# Supplementary material
Source: Royal Society of Chemistry journal article supplement (doi:10.1039/d6cc01681b)
Supplement: d6cc01681b1.pdf [file d6cc01681b1.pdf]

## *Supporting Information*

### **Nickel- and Copper-Cocatalyzed Atroposelective C–Si Cross-Coupling to Axially Chiral Heterobiaryl Silanes**

Lei Su, Shen Gao,\* and Jiawang Liu\*

Frontiers Science Center for Transformative Molecules, State Key Laboratory of Synergistic Chem-Bio Synthesis, Shanghai Key Laboratory for Molecular Engineering of Chiral Drugs, School of Chemistry and Chemical Engineering, Shanghai Jiao Tong University, Shanghai 200240, China.

E-mail: gaoshen2000@sjtu.edu.cn (S.G.), liujw2020@sjtu.edu.cn (J.L.)

#### **Table of Contents**

|                                                                                                         |    |
|---------------------------------------------------------------------------------------------------------|----|
| General Information.....                                                                                | 2  |
| 1. Syntheses of substrates .....                                                                        | 3  |
| 2. Nickel and Copper co-catalyzed atroposelective C–Si cross-coupling .....                             | 4  |
| 2.1 Optimization of reaction conditions.....                                                            | 4  |
| 2.2 General procedures for the Nickel and Copper co-catalyzed atroposelective C–Si cross-coupling ..... | 10 |
| 2.3 Characterization data of products. ....                                                             | 10 |
| 2.4 Inefficient heterobiaryl triflates. ....                                                            | 20 |
| 2.5 Crystal data of compounds 2r. ....                                                                  | 21 |
| References.....                                                                                         | 23 |
| NMR Spectra .....                                                                                       | 24 |
| HPLC Chromatograms.....                                                                                 | 48 |

## General Information

Unless otherwise noted, all reactions and manipulations were performed using standard Schlenk techniques or in a glovebox. All the chemicals were commercially purchased from Adamas-beta, Energy Chemical, Aladdin, Bide, Daicel Chiral Technologies (China) Co., and directly used without further purification. Anhydrous  $\text{CH}_2\text{Cl}_2$ , DCE, DME, DMF, THF, 1,4-Dioxane, and acetic ether were purchased from Adamas-beta.  $^1\text{H}$ ,  $^{13}\text{C}$ , and  $^{19}\text{F}$  NMR spectra were recorded on Bruker Avance 500 MHz spectrometer at STP unless otherwise indicated.  $^1\text{H}$  NMR and  $^{13}\text{C}$  NMR chemical shifts were reported in  $\delta$  units, parts per million (ppm) relative to the chemical shift of residual solvent. Reference peaks for chloroform in  $^1\text{H}$  NMR and  $^{13}\text{C}$  NMR spectra were set at 7.26 ppm and 77.16 ppm, respectively. Multiplicities are reported using the following abbreviations: s, singlet; d, doublet; t, triplet; q, quartet; m, multiplet; *br*, broad. High-resolution mass spectra (HRMS) were obtained using a Bruker APEXIII 7.0 and IonSpec 4.7 TESLA FTMS. Optical rotations were determined using a Perkin Elmer 341 MC polarimeter. HPLC analyses were performed on a Agilent 7890 liquid chromatograph.

# 1. Syntheses of substrates

## 1.1 Syntheses of Heterobiaryl triflates

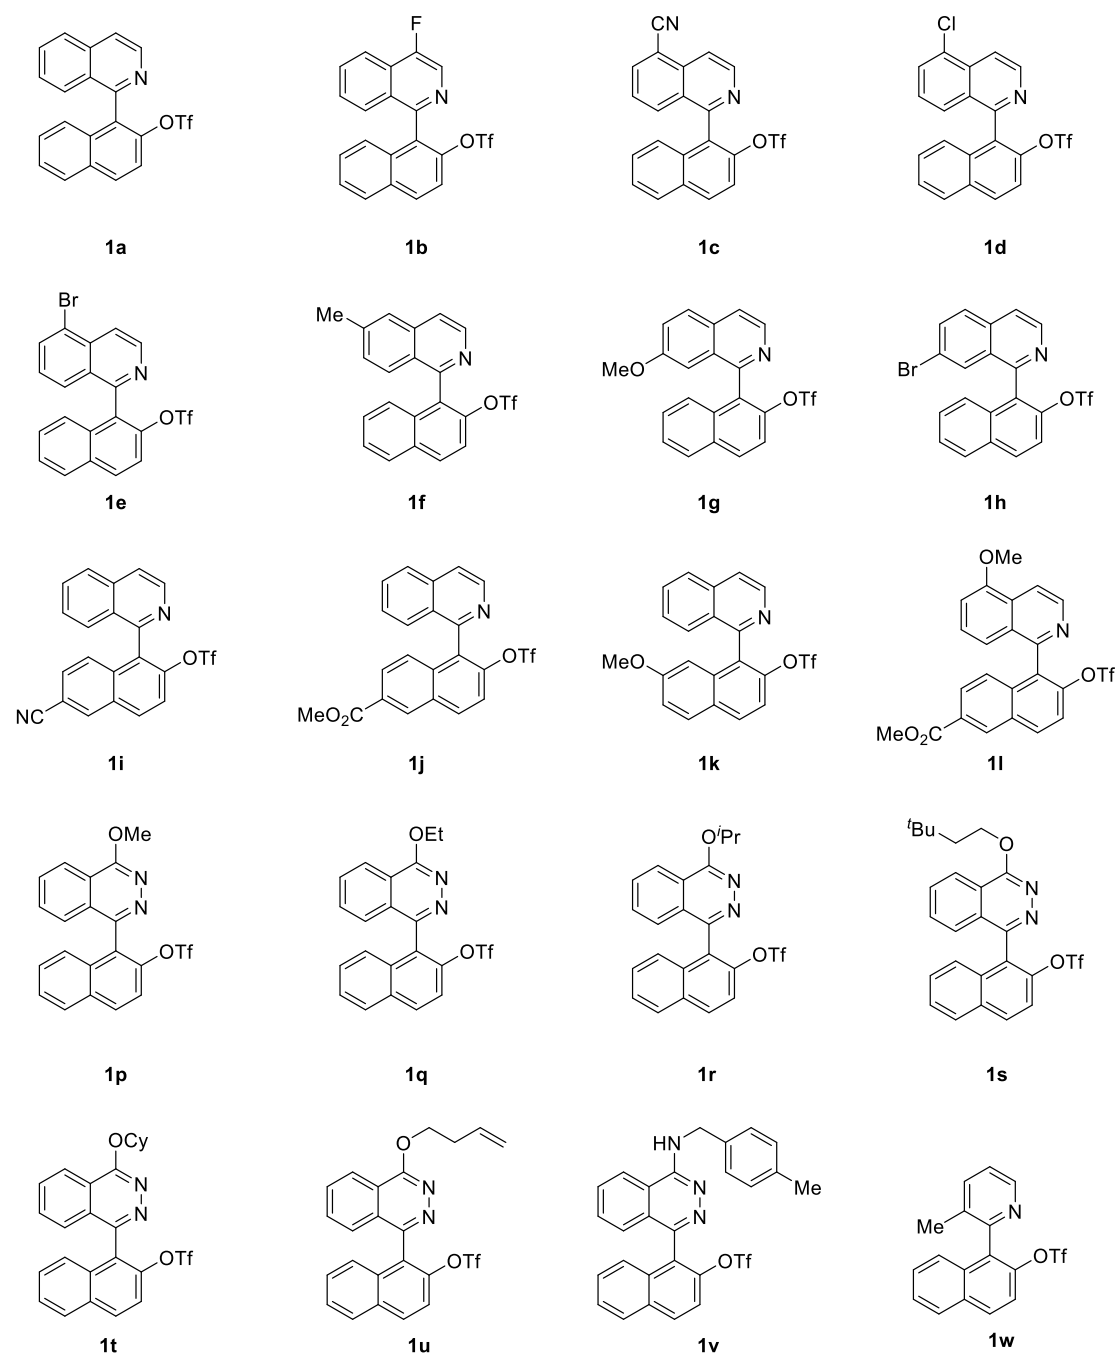

Compounds **1a-1l** and **1p-1w** are known compounds, and they were synthesized according to the literature procedure<sup>[1-2]</sup>.

## 2. Nickel and Copper co-catalyzed atroposelective C–Si cross-coupling

### 2.1 Optimization of reaction conditions

**Table S1.** Ligand screening on nickel catalyzed atroposelective silylation of heterobiaryls <sup>a</sup>

(*rac*)-**1a** (0.05 mmol) + PhMe<sub>2</sub>SiBpin (1.2 equiv) → (*R*)-**2a**

Conditions: 10 mol% Ni(COD)<sub>2</sub>, 20 mol% Ligand, CuF<sub>2</sub> (0.3 equiv), CsF (1.5 equiv), Toluene (0.05 M), 50 °C, 24 h

**L1**

**L2:** R = Ph  
**L3:** R = <sup>i</sup>Pr  
**L4:** R = <sup>t</sup>Bu

**L5:** R = <sup>i</sup>Bu  
**L6:** R = Me

**L7**

**L8**

**L9**

**L10**

**L11**

**L12**

| Entry | Ligand                 | Yield of <b>2a</b> (%) | <i>ee</i> of <b>2a</b> (%) |
|-------|------------------------|------------------------|----------------------------|
| 1     | <b>PCy<sub>3</sub></b> | 69                     | -                          |
| 2     | <b>L1</b>              | 69(70 <sup>b</sup> )   | 96                         |
| 3     | <b>L2</b>              | 20                     | 54                         |
| 4     | <b>L3</b>              | 72                     | 91                         |
| 5     | <b>L4</b>              | 26                     | 97                         |
| 6     | <b>L5</b>              | 40                     | -85                        |
| 7     | <b>L6</b>              | 24                     | -82                        |
| 8     | <b>L7</b>              | 30                     | -54                        |
| 9     | <b>L8</b>              | 28                     | 1                          |
| 10    | <b>L9</b>              | 17                     | 3                          |
| 11    | <b>L10</b>             | 24                     | -2                         |
| 12    | <b>L11</b>             | 16                     | 0                          |
| 13    | <b>L12</b>             | 50                     | -18                        |

<sup>a</sup> The yields were determined by GC analysis using dodecane as the internal standard. The *ee* value was determined by HPLC using a chiral column. <sup>b</sup> Isolated yield.

**Table S2.** Effect of catalyst loading and Ni/L ratio on nickel catalyzed atroposelective silylation of heterobiaryls <sup>a</sup>

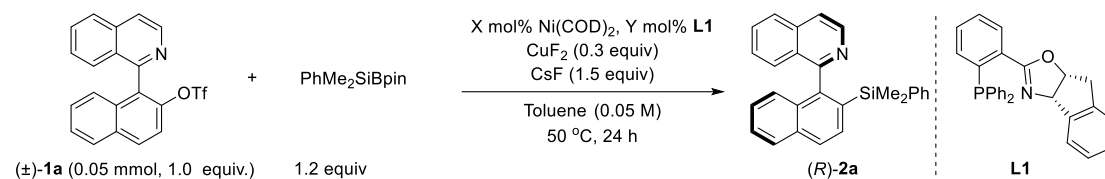

| Entry | X/Y   | Yield of <b>2a</b> (%) | <i>ee</i> of <b>2a</b> (%) |
|-------|-------|------------------------|----------------------------|
| 1     | 10/20 | 69(70 <sup>b</sup> )   | 96                         |
| 2     | 5/10  | 50                     | 86                         |
| 3     | 10/10 | 9                      | 75                         |
| 4     | 10/12 | 9                      | 27                         |
| 5     | 15/30 | 63                     | 93                         |

<sup>a</sup> The yields were determined by GC analysis using dodecane as the internal standard, The *ee* value was determined by HPLC using a chiral column. <sup>b</sup> Isolated yield.

**Table S3.** Effect of ratio of substrate on nickel catalyzed atroposelective silylation of heterobiaryls <sup>a</sup>

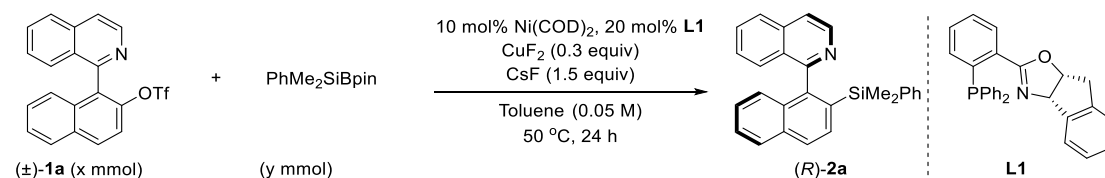

| Entry | X:Y          | Yield of <b>2a</b> (%) | <i>ee</i> of <b>2a</b> (%) |
|-------|--------------|------------------------|----------------------------|
| 1     | 0.05 : 0.06  | 69(70 <sup>b</sup> )   | 96                         |
| 2     | 0.05 : 0.10  | 43                     | 94                         |
| 3     | 0.05 : 0.075 | 59                     | 96                         |
| 4     | 0.05 : 0.05  | 48                     | 95                         |
| 5     | 0.10 : 0.05  | 55                     | 90                         |

<sup>a</sup> The yields were determined by GC analysis using dodecane as the internal standard. The *ee* value was determined by HPLC using a chiral column. <sup>b</sup> Isolated yield.

**Table S4.** Effect of nickel source on nickel catalyzed atroposelective silylation of heterobiaryls <sup>a</sup>

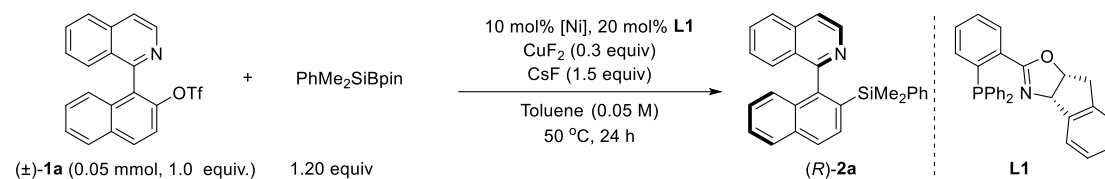

| Entry          | Nickel                 | Yield of 2a (%)      | ee of 2a (%) |
|----------------|------------------------|----------------------|--------------|
| 1              | Ni(COD) <sub>2</sub>   | 69(70 <sup>b</sup> ) | 96           |
| 2              | w/o Nickel             | trace                | -            |
| 3              | NiBr <sub>2</sub> ·dme | 20                   | 90           |
| 4 <sup>c</sup> | NiBr <sub>2</sub> ·dme | trace                | -            |

<sup>a</sup> The yields were determined by GC analysis using dodecane as the internal standard. The *ee* value was determined by HPLC using a chiral column. <sup>b</sup> Isolated yield. <sup>c</sup> with extra 0.3 equiv Mn powder.

**Table S5.** Effect of concentration on nickel catalyzed atroposelective silylation of heterobiaryls <sup>a</sup>

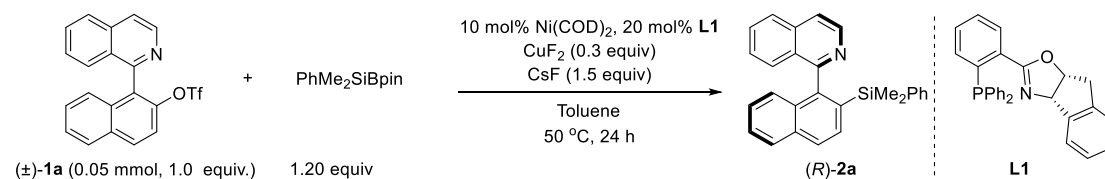

| Entry | Concentration (M) | Yield of 2a (%)      | ee of 2a (%) |
|-------|-------------------|----------------------|--------------|
| 1     | 0.05              | 69(70 <sup>b</sup> ) | 96           |
| 2     | 0.2               | 48                   | 92           |
| 3     | 0.1               | 51                   | 95           |
| 4     | 0.067             | 57                   | 94           |
| 5     | 0.033             | 36                   | 94           |
| 6     | 0.025             | 25                   | 90           |

<sup>a</sup> The yields were determined by GC analysis using dodecane as the internal standard. The *ee* value was determined by HPLC using a chiral column. <sup>b</sup> Isolated yield.

**Table S6.** Effect of copper salt on nickel catalyzed atroposelective silylation of heterobiaryls <sup>a</sup>

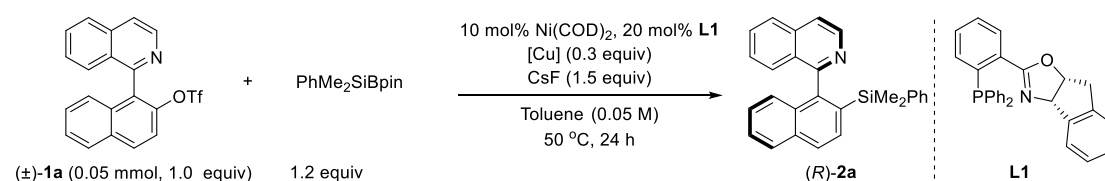

| Entry           | Copper Salt                                         | Yield of <b>2a</b> (%) | <i>ee</i> of <b>2a</b> (%) |
|-----------------|-----------------------------------------------------|------------------------|----------------------------|
| 1               | CuCl                                                | 70(70 <sup>b</sup> )   | 99                         |
| 2               | none                                                | 20                     | 90                         |
| 3               | CuBr                                                | 70                     | 99                         |
| 4               | CuI                                                 | 35                     | 80                         |
| 5               | CuF <sub>2</sub>                                    | 69                     | 96                         |
| 6               | TcCu                                                | 60                     | 97                         |
| 7               | Cu(CH <sub>3</sub> CN) <sub>4</sub> BF <sub>4</sub> | 17                     | 95                         |
| 8               | CuCl <sub>2</sub>                                   | 35                     | 98                         |
| 9               | Cu(OTf) <sub>2</sub>                                | trace                  | -                          |
| 10              | Cu(acac) <sub>2</sub>                               | 28                     | 60                         |
| 11              | CuC <sub>2</sub> O <sub>4</sub>                     | 49                     | 94                         |
| 12 <sup>c</sup> | CuCl                                                | 26                     | 99                         |
| 13 <sup>d</sup> | CuCl                                                | 60                     | 99                         |

<sup>a</sup> The yields were determined by GC analysis using dodecane as the internal standard. The *ee* value was determined by HPLC using a chiral column. <sup>b</sup> Isolated yield. <sup>c</sup> 0.1 equiv CuCl. <sup>d</sup> 0.5 equiv CuCl.

**Table S7.** Effect of reaction temperature on nickel catalyzed atroposelective silylation of heterobiaryls <sup>a</sup>

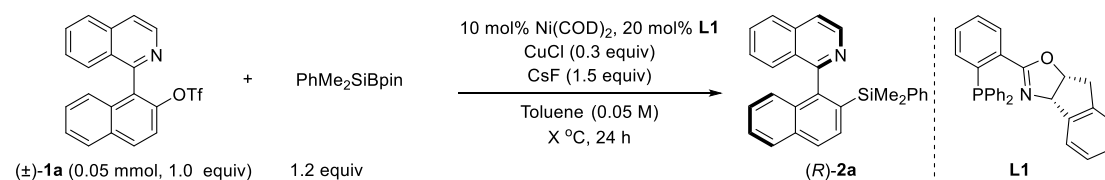

| Entry | Temperature (°C) | Yield of <b>2a</b> (%) | <i>ee</i> of <b>2a</b> (%) |
|-------|------------------|------------------------|----------------------------|
| 1     | 60               | 75(72 <sup>b</sup> )   | 98                         |
| 2     | 25               | trace                  | -                          |
| 3     | 50               | 70                     | 99                         |
| 4     | 70               | 75                     | 97                         |

<sup>a</sup> The yields were determined by GC analysis using dodecane as the internal standard. The *ee* value was determined by HPLC using a chiral column. <sup>b</sup> Isolated yield.

**Table S8.** Effect of the additive on nickel catalyzed atroposelective silylation of heterobiaryls <sup>a</sup>

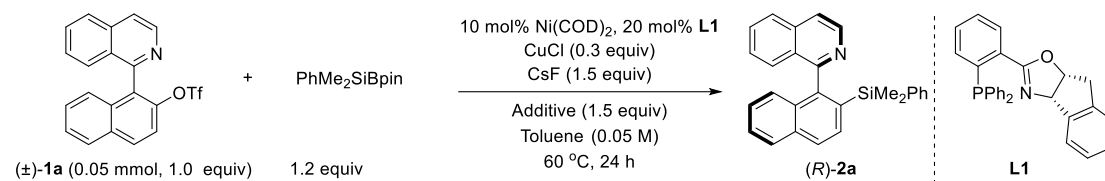

| Entry          | Additive                       | Yield of <b>2a</b> (%) | <i>ee</i> of <b>2a</b> (%) |
|----------------|--------------------------------|------------------------|----------------------------|
| 1              | CsF                            | 75(72 <sup>b</sup> )   | 98                         |
| 2              | none                           | N.R.                   | -                          |
| 3              | LiOMe                          | 80                     | 94                         |
| 4              | K <sub>3</sub> PO <sub>4</sub> | 66                     | 98                         |
| 5              | LiF                            | trace                  | -                          |
| 6              | KF                             | 8                      | -                          |
| 7              | LiO <sup>t</sup> Bu            | 81                     | 96                         |
| 8 <sup>c</sup> | CsF                            | 20                     | 98                         |
| 9 <sup>d</sup> | CsF                            | 70                     | 98                         |

<sup>a</sup> The yields were determined by GC analysis using dodecane as the internal standard. The *ee* value was determined by HPLC using a chiral column. <sup>b</sup> Isolated yield. <sup>c</sup> 0.5 equiv CsF. <sup>d</sup> 1.0 equiv CsF. <sup>f</sup>

**Table S9.** Effect of solvent on nickel catalyzed atroposelective silylation of heterobiaryls <sup>a</sup>

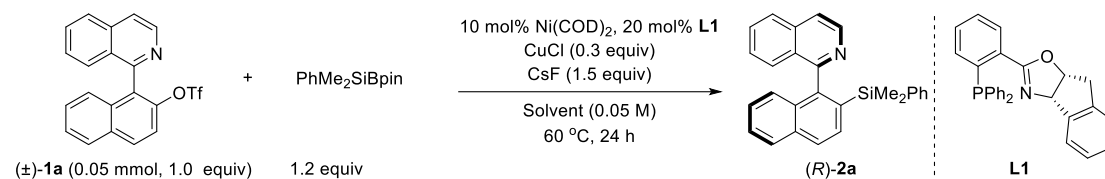

| Entry | Solvent     | Yield of <b>2a</b> (%) | <i>ee</i> of <b>2a</b> (%) |
|-------|-------------|------------------------|----------------------------|
| 1     | toluene     | 75(72 <sup>c</sup> )   | 98                         |
| 2     | xylene      | 64                     | 97                         |
| 3     | PhCl        | 61                     | 98                         |
| 4     | DMF         | 75                     | 89                         |
| 5     | DMAc        | 75                     | 94                         |
| 6     | THF         | 58                     | 92                         |
| 7     | 1,4-dioxane | 81                     | 96                         |
| 8     | cyclohexane | 35                     | 85                         |
| 9     | CPME        | 67                     | 97                         |
| 10    | DME         | 75                     | 84                         |
| 11    | EtOAc       | 61                     | 90                         |
| 12    | MeCN        | 58                     | 89                         |
| 13    | MeOH        | 17                     | 77                         |

<sup>a</sup> The yields were determined by GC analysis using dodecane as the internal standard. The *ee* value was determined by HPLC using a chiral column. <sup>b</sup> Isolated yield.

**Table S10.** Effect of the reaction time on nickel catalyzed atroposelective silylation of heterobiaryls <sup>[a]</sup>

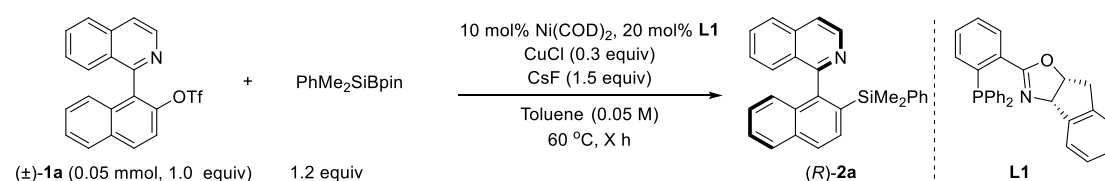

| Entry | Time | Yield of <b>2a</b> (%) | <i>ee</i> of <b>2a</b> (%) |
|-------|------|------------------------|----------------------------|
| 1     | 24 h | 75(72 <sup>b</sup> )   | 98                         |
| 2     | 3 h  | 20                     | 98                         |
| 3     | 6 h  | 41                     | 98                         |
| 4     | 12 h | 67                     | 98                         |

<sup>a</sup> The yields were determined by GC analysis using dodecane as the internal standard. The *ee* value was determined by HPLC using a chiral column. <sup>b</sup> Isolated yield.

## 2.2 General procedures for the Nickel and Copper co-catalyzed atroposelective C–Si cross-coupling

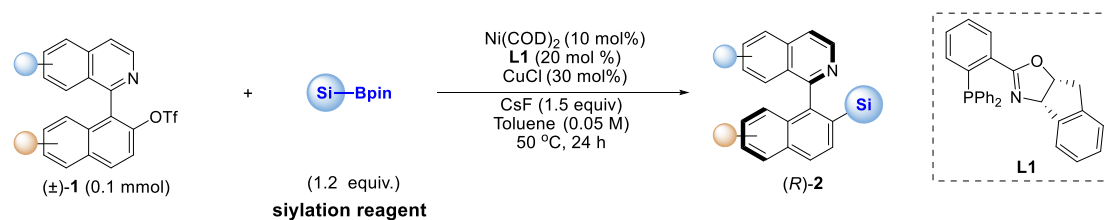

**General procedure :** In a glovebox, to a 4 mL screw-cap vial equipped with an oven-dried stirring bar were added the  $\text{Ni}(\text{COD})_2$  (2.75 mg, 0.01 mmol, 10 mol%), CuCl (3.0 mg, 0.03 mmol, 30 mol%), L1 (8.4 mg, 0.02 mmol, 20 mol%), CsF (22.8 mg, 0.15 mmol, 150 mol%), heterobiaryl triflates **1** (0.1 mmol, 1.0 equiv.), and Toluene (2.0 mL), and silylation reagent (0.12 mmol, 1.2 equiv.). After sealed with a teflon-lined screw cap, the vial was removed from the glove box and stirred at 60 °C for 24 h (the mixture was stirred at 500 rpm). After the reaction was complete, the reaction mixture was quenched by the addition of water (1 ml), the organic phase was separated and filtered through a short pad of silica gel (EtOAc) to give the crude product. Dodecane (10  $\mu\text{L}$ ) was added as an internal standard for GC analysis. The product was purified by chromatography on silica gel for each substrate.

Racemic silylation product was synthesized according to the general procedure using  $\text{PCy}_3$  as ligand in 0.025 mmol scale and was purified by PTLC for HPLC analysis.

## 2.3 Characterization data of products.

### (R)-1-(2-(Dimethyl(phenyl)silyl)naphthalen-1-yl)isoquinoline (2a).

White solid, 72% (28.0 mg) isolated yield (eluent: PE:EA=10:1),  $[\alpha]_{\text{D}}^{20} = -61.02$  ( $c = 1.0$  in  $\text{CHCl}_3$ ); 98% *ee*, determined by HPLC analysis (Chiralpak IC-3 column, *n*-hexane/*i*-PrOH = 96:4 (v/v), flow rate 1.0 mL/min,  $\lambda = 254$  nm, 25 °C),  $t_{\text{R}}$  (major) = 7.85 min,  $t_{\text{R}}$  (minor) = 20.76 min.;  **$^1\text{H}$  NMR (500 MHz, Chloroform-*d*)**  $\delta$  8.61 (d,  $J = 5.8$  Hz, 1H), 7.92 (d,  $J = 8.3$  Hz, 1H), 7.87 (d,  $J = 8.2$  Hz, 1H), 7.79 (d,  $J = 8.2$  Hz, 1H), 7.73 (d,  $J = 8.4$  Hz, 1H), 7.66 (d,  $J = 5.7$  Hz, 1H), 7.59-7.52 (m, 1H), 7.45-7.38 (m, 1H), 7.25-7.15 (m, 5H), 7.17-7.09 (m, 1H), 7.10-7.03 (m, 2H), 6.97 (d,  $J = 8.5$  Hz, 1H), 0.16 (s, 3H), -0.03 (s, 3H) ppm.  **$^{13}\text{C}$  NMR (126 MHz,  $\text{CDCl}_3$ )**  $\delta$  161.44, 144.03, 142.15, 138.27, 135.91,

135.72, 133.83, 133.76, 132.58, 131.53, 130.11, 129.31, 128.57, 127.98, 127.94, 127.51, 127.40, 127.08, 126.72, 126.43, 126.40, 126.24, 120.72, -1.09, -1.77 ppm. **HRMS** (ESI) calcd. for  $C_{27}H_{24}NSi^+$   $[M+H]^+$   $m/z$  390.1673, found 390.1673.

**(R)-1-(2-(Dimethyl(phenyl)silyl)naphthalen-1-yl)-4-fluoroisoquinoline (2b).**

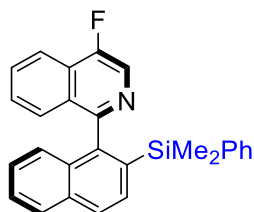

White solid, 67% (27.3 mg) isolated yield (eluent: PE:EA=20:1),  $[\alpha]_D^{20} = -68.61$  ( $c = 1.0$  in  $CHCl_3$ ); 95% *ee*, determined by HPLC analysis (Chiralpak IC-3 column, *n*-hexane/*i*-PrOH = 90:10 (v/v), flow rate 1.0 mL/min,  $\lambda = 254$  nm, 25 °C),  $t_R$  (major) = 4.60 min;  $t_R$  (minor) = 5.08 min;

**$^1H$  NMR (500 MHz, Chloroform-*d*)**  $\delta$  8.41 (d,  $J = 2.0$  Hz, 1H), 8.02 (d,  $J = 8.4$  Hz, 1H), 7.96 (d,  $J = 8.3$  Hz, 1H), 7.89 (d,  $J = 8.2$  Hz, 1H), 7.79 (d,  $J = 8.3$  Hz, 1H), 7.66-7.59 (m, 1H), 7.47-7.40 (m, 1H), 7.30-7.23 (m, 1H), 7.24-7.17 (m, 2H), 7.11-7.04 (m, 3H), 7.02-6.95 (m, 2H), 6.93 (d,  $J = 8.5$  Hz, 1H), 0.25 (s, 3H), 0.13 (s, 3H) ppm.  **$^{13}C$  NMR (125 MHz, Chloroform-*d*)**  $\delta$  157.53 (d,  $J = 5.2$  Hz), 156.03, 153.96, 143.35, 137.49, 136.42, 133.81, 133.57, 132.66, 131.41, 130.44 (d,  $J = 2.9$  Hz), 130.23 (d,  $J = 1.2$  Hz), 128.51, 128.06, 127.84, 127.77, 127.76, 127.23, 127.06, 126.51, 126.36, 126.42 (d,  $J = 15.2$  Hz), 126.23, 119.65 (d,  $J = 4.1$  Hz), -1.01, -1.54 ppm.  **$^{19}F$  NMR (470 MHz,  $CDCl_3$ )**  $\delta$  -140.4 ppm. **HRMS** (ESI) calcd. for  $C_{27}H_{23}FNSi^+$   $[M+H]^+$   $m/z$  408.1578, found 408.1578.

**(R)-1-(2-(Dimethyl(phenyl)silyl)naphthalen-1-yl)isoquinoline-5-carbonitrile (2c).**

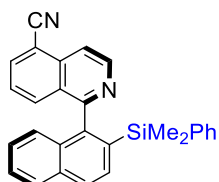

White solid, 42% (17.5 mg) isolated yield (eluent: PE:EA=20:1),  $[\alpha]_D^{20} = -58.69$  ( $c = 1.0$  in  $CHCl_3$ ); 96% *ee*, determined by HPLC analysis (Chiralpak OD-3 column, *n*-hexane/*i*-PrOH = 70:30 (v/v), flow rate 0.7 mL/min,  $\lambda = 254$  nm, 25 °C),  $t_R$  (major) = 7.04 min;  $t_R$  (minor) = 17.74 min;  **$^1H$  NMR (500**

**MHz, Chloroform-*d*)**  $\delta$  8.78 (d,  $J = 5.8$  Hz, 1H), 8.00 (d,  $J = 8.3$  Hz, 1H), 7.97-7.94 (m, 1H), 7.94-7.89 (m, 2H), 7.85 (d,  $J = 8.4$  Hz, 1H), 7.48-7.43 (m, 1H), 7.40-7.37 (m, 1H), 7.22-7.16 (m, 2H), 7.05-6.99 (m, 1H), 6.98-6.93 (m, 2H), 6.90 (t,  $J = 7.4$  Hz, 2H), 6.82 (d,  $J = 8.4$  Hz, 1H), 0.33 (s, 3H), 0.18 (s, 3H) ppm.  **$^{13}C$  NMR (125 MHz, Chloroform-*d*)**  $\delta$  162.44, 144.49, 142.69, 137.13, 136.35, 136.16, 135.22, 133.79, 133.40, 133.21, 132.43, 131.29, 128.51, 128.47, 128.19, 128.12, 127.22, 126.68, 126.62, 126.11, 125.95, 117.89, 116.90, 109.58, -0.92, -1.61 ppm. **HRMS** (ESI) calcd. for  $C_{28}H_{23}N_2Si^+$   $[M+H]^+$   $m/z$  415.1625, found 415.1625.

**(R)-5-Chloro-1-(2-(dimethyl(phenyl)silyl)naphthalen-1-yl)isoquinoline (2d).**

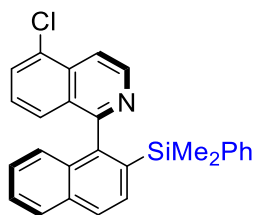

Colorless oil, 37% (15.6 mg) isolated yield (eluent: PE:EA=20:1),  $[\alpha]_D^{20}$  = -65.41 ( $c = 1.0$  in  $\text{CHCl}_3$ ); 98% *ee*, determined by HPLC analysis (Chiralpak IC-3 column, *n*-hexane/*i*-PrOH = 90:10 (v/v), flow rate 1.0 mL/min,  $\lambda = 254$  nm, 25 °C),  $t_R$  (major) = 4.99 min;  $t_R$  (minor) = 9.08 min;

**$^1\text{H}$  NMR (500 MHz, Chloroform-*d*)**  $\delta$  8.70 (d,  $J = 6.0$  Hz, 1H), 8.01 (d,  $J = 6.0$  Hz, 1H), 7.96 (d,  $J = 8.4$  Hz, 1H), 7.89 (d,  $J = 8.2$  Hz, 1H), 7.78 (d,  $J = 8.3$  Hz, 1H), 7.64-7.59 (m, 1H), 7.47-7.40 (m, 1H), 7.23-7.16 (m, 1H), 7.16-7.04 (m, 5H), 7.02-6.96 (m, 2H), 6.89 (d,  $J = 8.5$  Hz, 1H), 0.25 (s, 3H), 0.10 (s, 3H) ppm.  **$^{13}\text{C}$  NMR (125 MHz, Chloroform-*d*)**  $\delta$  161.70, 143.58, 143.18, 137.57, 136.00, 133.77, 133.73, 133.58, 132.51, 131.39, 131.16, 130.15, 129.95, 128.55, 128.06, 127.77, 127.23, 127.07, 126.79, 126.54, 126.40, 126.25, 117.16, -1.02, -1.63 ppm. **HRMS** (ESI) calcd. for  $\text{C}_{27}\text{H}_{23}\text{ClNSi}^+$   $[\text{M}+\text{H}]^+$   $m/z$  424.1283, found 424.1285.

**(R)-5-Bromo-1-(2-(dimethyl(phenyl)silyl)naphthalen-1-yl)isoquinoline (2e).**

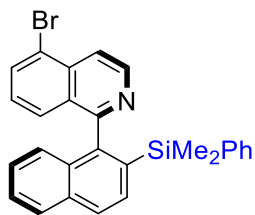

Colorless oil, 54% (25.1 mg) isolated yield (eluent: PE:EA=20:1),  $[\alpha]_D^{25}$  = -48.57 ( $c = 1.0$  in  $\text{CHCl}_3$ ); 95% *ee*, determined by HPLC analysis (Chiralpak IC-3 column, *n*-hexane/*i*-PrOH = 90:10 (v/v), flow rate 1.0 mL/min,  $\lambda = 254$  nm, 25 °C),  $t_R$  (major) = 5.21 min;  $t_R$  (minor) = 9.49 min;

**$^1\text{H}$  NMR (500 MHz, Chloroform-*d*)**  $\delta$  8.69 (d,  $J = 6.0$  Hz, 1H), 7.96 (t,  $J = 6.5$  Hz, 2H), 7.89 (d,  $J = 8.2$  Hz, 1H), 7.83-7.75 (m, 2H), 7.44 (t,  $J = 7.5$  Hz, 1H), 7.22-7.15 (m, 2H), 7.09-6.95 (m, 6H), 6.88 (d,  $J = 8.6$  Hz, 1H), 0.26 (s, 3H), 0.11 (s, 3H) ppm.  **$^{13}\text{C}$  NMR (125 MHz, Chloroform-*d*)**  $\delta$  161.81, 143.50, 143.42, 137.49, 136.06, 134.96, 133.77, 133.70, 133.55, 132.52, 131.38, 130.30, 128.57, 128.06, 127.80, 127.78, 127.31, 127.21, 126.54, 126.41, 126.26, 121.78, 119.74, -1.01, -1.61 ppm. **HRMS** (ESI) calcd. for  $\text{C}_{27}\text{H}_{23}\text{BrNSi}^+$   $[\text{M}+\text{H}]^+$   $m/z$  468.0778, found 468.0772.

**(R)-1-(2-(Dimethyl(phenyl)silyl)naphthalen-1-yl)-6-methylisoquinoline (2f).**

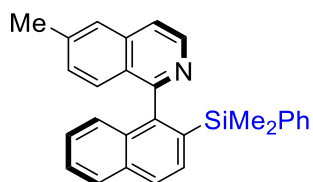

Colorless oil, 68% (27.3 mg) isolated yield (eluent: PE:EA=20:1),  $[\alpha]_D^{20} = -65.26$  ( $c = 1.0$  in  $\text{CHCl}_3$ ); 98% *ee*, determined by HPLC analysis (Chiralpak IA-3 column, *n*-hexane/*i*-PrOH = 90:10 (v/v), flow rate 1.0 mL/min,  $\lambda = 254$  nm, 25 °C),  $t_R$  (major) = 6.11 min;  $t_R$

(minor) = 14.52 min;  **$^1\text{H}$  NMR (500 MHz, Chloroform-*d*)**  $\delta$  8.58 (d,  $J = 5.7$  Hz, 1H), 7.93-7.85

(m, 2H), 7.71 (d,  $J = 8.4$  Hz, 1H), 7.62-7.55 (m, 2H), 7.45-7.40 (m, 1H), 7.24-7.09 (m, 7H), 7.05-6.98 (m, 2H), 2.49 (s, 3H), 0.17 (s, 3H), -0.06 (s, 3H) ppm.  $^{13}\text{C}$  NMR (125 MHz, Chloroform-*d*)  $\delta$  161.03, 144.25, 142.31, 140.46, 138.56, 136.28, 135.59, 133.93, 133.77, 132.60, 131.56, 129.35, 128.52, 127.95, 127.78, 127.76, 127.45, 127.40, 126.44, 126.41, 126.20, 125.64, 120.22, 22.05, -1.09, -1.84 ppm. HRMS (ESI) calcd. for  $\text{C}_{28}\text{H}_{26}\text{NSi}^+$   $[\text{M}+\text{H}]^+$   $m/z$  404.1829, found 404.1837.

**(R)-1-(2-(dimethyl(phenyl)silyl)naphthalen-1-yl)-7-methoxyisoquinoline (2g).**

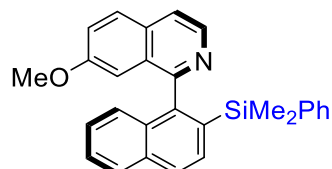

Colorless oil, 70% (29.6 mg) isolated yield (eluent: PE:EA=20:1),  $[\alpha]_{\text{D}}^{20} = -53.45$  ( $c = 1.0$  in  $\text{CHCl}_3$ ); 98% *ee*, determined by HPLC analysis (Chiralpak IC-3 column, *n*-hexane/*i*-PrOH = 90:10 (v/v), flow rate 0.7 mL/min,  $\lambda = 254$  nm, 25 °C),  $t_{\text{R}}$  (major) = 6.64 min;  $t_{\text{R}}$  (minor) = 12.77 min;  $^1\text{H}$  NMR (500 MHz, Chloroform-*d*)  $\delta$  8.54 (d,  $J = 5.6$  Hz, 1H), 7.95-7.90 (m, 1H), 7.90-7.85 (m, 1H), 7.80-7.70 (m, 2H), 7.65-7.60 (m, 1H), 7.47-7.40 (m, 1H), 7.27-7.18 (m, 3H), 7.20-7.12 (m, 4H), 7.12 - 7.05 (m, 2H), 7.04-6.98 (m, 1H), 6.40 (d,  $J = 2.6$  Hz, 1H), 3.36 (s, 3H), 0.24 (s, 3H), -0.05 (s, 3H) ppm.  $^{13}\text{C}$  NMR (126 MHz,  $\text{CDCl}_3$ )  $\delta$  159.78, 158.11, 144.20, 140.44, 138.49, 135.55, 133.89, 133.78, 132.43, 131.68, 131.50, 130.42, 128.64, 128.34, 127.96, 127.50, 127.40, 126.45, 126.37, 126.23, 123.20, 120.41, 105.44, 55.18, -0.94, -1.98 ppm. HRMS (ESI) calcd. for  $\text{C}_{28}\text{H}_{26}\text{NOSi}^+$   $[\text{M}+\text{H}]^+$   $m/z$  420.1778, found 420.1783.

**(R)-7-Bromo-1-(2-(dimethyl(phenyl)silyl)naphthalen-1-yl)isoquinoline (2h).**

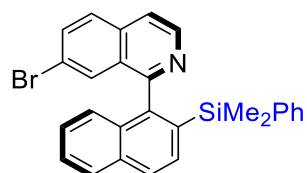

White solid, 52% (24.3 mg) isolated yield (eluent: PE:EA=20:1),  $[\alpha]_{\text{D}}^{20} = -37.51$  ( $c = 1.0$  in  $\text{CHCl}_3$ ); 96% *ee*, determined by HPLC analysis (Chiralpak IC-3 column, *n*-hexane/*i*-PrOH = 90:10 (v/v), flow rate 1.0 mL/min,  $\lambda = 254$  nm, 25 °C),  $t_{\text{R}}$  (major) = 5.20 min;  $t_{\text{R}}$  (major) = 8.82 min;  $^1\text{H}$  NMR (500 MHz, Chloroform-*d*)  $\delta$  8.63 (d,  $J = 5.7$  Hz, 1H), 7.97 (d,  $J = 8.4$  Hz, 1H), 7.90 (d,  $J = 8.2$  Hz, 1H), 7.80 (d,  $J = 8.4$  Hz, 1H), 7.64-7.58 (m, 3H), 7.47-7.43 (m, 1H), 7.32-7.31 (m, 1H), 7.26-7.18 (m, 1H), 7.09-7.05 (m, 3H), 7.04-7.00 (m, 2H), 6.89 (d,  $J = 8.4$  Hz, 1H), 0.27 (s, 3H), 0.09 (s, 3H) ppm.  $^{13}\text{C}$  NMR (125 MHz, Chloroform-*d*)  $\delta$  160.60, 143.18, 142.53, 137.65, 135.96, 134.33, 133.88, 133.67, 133.55, 132.49, 131.37, 130.20, 129.98, 128.67, 128.46, 128.12, 127.89, 127.36, 126.59, 126.49, 126.09, 121.04, 120.45, -1.01, -1.71 ppm. HRMS (ESI) calcd. for  $\text{C}_{27}\text{H}_{23}\text{BrNSi}^+$   $[\text{M}+\text{H}]^+$   $m/z$  468.0778, found 468.0781.

**(R)-6-(Dimethyl(phenyl)silyl)-5-(isoquinolin-1-yl)-2-naphthonitrile (2i).**

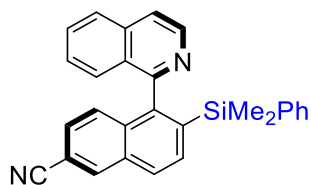

White solid, 78% (32.5 mg) isolated yield (eluent: PE:EA=20:1),  $[\alpha]_D^{20} = -91.92$  ( $c = 1.0$  in  $\text{CHCl}_3$ ); 91% *ee*, determined by HPLC analysis (Chiralpak IC-3 column, *n*-hexane/*i*-PrOH = 80:20 (v/v), flow rate 1.0 mL/min,  $\lambda = 254$  nm, 25 °C),  $t_R$  (major) = 14.41 min;  $t_R$  (minor) = 22.64 min;  $^1\text{H NMR}$  (500 MHz, Chloroform-*d*)  $\delta$  8.62 (d,  $J = 5.7$  Hz, 1H), 8.28 (d,  $J = 1.7$  Hz, 1H), 7.97 (d,  $J = 8.4$  Hz, 1H), 7.89-7.81 (m, 2H), 7.71 (d,  $J = 5.7$  Hz, 1H), 7.64-7.57 (m, 1H), 7.35-7.29 (m, 1H), 7.29-7.22 (m, 1H), 7.18-7.11 (m, 4H), 7.10-7.03 (m, 3H), 0.20 (s, 3H), -0.00 (s, 3H) ppm.  $^{13}\text{C NMR}$  (125 MHz, Chloroform-*d*)  $\delta$  160.04, 144.27, 142.22, 140.52, 137.30, 135.99, 134.22, 133.75, 133.59, 133.43, 132.56, 130.40, 129.09, 128.86, 127.74, 127.70, 127.54, 127.46, 127.36, 126.98, 126.72, 121.21, 119.22, 109.90, -1.27, -1.97 ppm. HRMS (ESI) calcd. for  $\text{C}_{28}\text{H}_{23}\text{N}_2\text{Si}^+$   $[\text{M}+\text{H}]^+$   $m/z$  415.1625, found 415.1628.

**(R)-Methyl 6-(dimethyl(phenyl)silyl)-5-(isoquinolin-1-yl)-2-naphthoate (2j).**

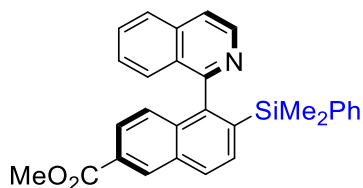

Yellow oil, 84% (37.5 mg) isolated yield (eluent: PE:EA=1:1),  $[\alpha]_D^{25} = -107.18$  ( $c = 1.0$  in  $\text{CHCl}_3$ ); 97% *ee*, determined by HPLC analysis (Chiralpak IC-3 column, *n*-hexane/*i*-PrOH = 90:10 (v/v), flow rate 1.0 mL/min,  $\lambda = 254$  nm, 25 °C),  $t_R$  (major) = 14.59 min;  $t_R$  (minor) = 26.34 min;  $^1\text{H NMR}$  (500 MHz, Chloroform-*d*)  $\delta$  8.67-8.60 (m, 2H), 8.03 (d,  $J = 8.4$  Hz, 1H), 7.85-7.74 (m, 3H), 7.69 (d,  $J = 5.7$  Hz, 1H), 7.62-7.55 (m, 1H), 7.26-7.11 (m, 5H), 7.10-7.04 (m, 2H), 7.02 (d,  $J = 8.9$  Hz, 1H), 3.94 (s, 3H), 0.20 (s, 3H), -0.01 (s, 3H) ppm.  $^{13}\text{C NMR}$  (125 MHz, Chloroform-*d*)  $\delta$  167.21, 160.76, 144.00, 142.17, 139.14, 137.73, 135.97, 134.45, 133.79, 132.86, 132.44, 131.10, 130.25, 129.19, 128.78, 128.72, 127.79, 127.66, 127.47, 127.27, 126.86, 126.70, 125.56, 121.00, 52.34, -1.19, -1.89 ppm. HRMS (ESI)  $m/z$  calculated for  $\text{C}_{29}\text{H}_{25}\text{NO}_2\text{Si}^+$   $[\text{M}+\text{H}]^+$ : 448.1727, found 448.1773.

**(R)-1-(2-(Dimethyl(phenyl)silyl)-7-methoxynaphthalen-1-yl)isoquinoline (2k).**

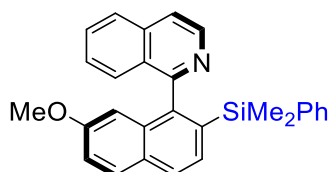

Colorless oil, 79% (32.2 mg) isolated yield (eluent: PE:EA=20:1),  $[\alpha]_D^{20} = -128.64$  ( $c = 1.0$  in  $\text{CHCl}_3$ ); 98% *ee*, determined by HPLC analysis (Chiralpak IC-3 column, *n*-hexane/*i*-PrOH = 90:10 (v/v), flow rate 1.0 mL/min,  $\lambda = 254$  nm, 25 °C),  $t_R$  (major) = 5.85 min;  $t_R$  (minor) = 12.23 min;  $^1\text{H NMR}$

(400 MHz, CDCl<sub>3</sub>) δ 8.62 (d, *J* = 5.7 Hz, 1H), 7.85 (d, *J* = 8.3 Hz, 1H), 7.83-7.76 (m, 2H), 7.66 (d, *J* = 5.7 Hz, 1H), 7.64-7.54 (m, 2H), 7.32-7.25 (m, 1H), 7.25-7.02 (m, 7H), 6.24 (d, *J* = 2.5 Hz, 1H), 3.40 (s, 3H), 0.14 (s, 3H), -0.02 (s, 3H) ppm. <sup>13</sup>C NMR (101 MHz, CDCl<sub>3</sub>) δ 161.58, 157.70, 142.66, 142.22, 138.38, 136.25, 135.95, 133.82, 133.58, 130.13, 129.52, 129.51, 129.47, 129.12, 128.52, 127.97, 127.38, 127.21, 127.09, 126.72, 120.72, 118.86, 105.11, 55.04, -1.08, -1.73 ppm. HRMS (ESI) calcd. for C<sub>28</sub>H<sub>26</sub>NOSi<sup>+</sup> [M+H]<sup>+</sup> *m/z* 420.1778, found 420.1779.

**(*R*)-Methyl 6-(dimethyl(phenyl)silyl)-5-(5-methoxyisoquinolin-1-yl)-2-naphthoate (21).**

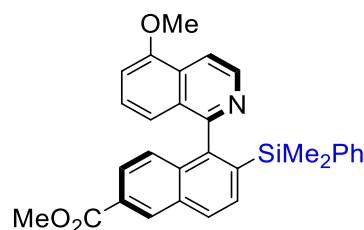

White solid, 52% (24.7 mg) isolated yield (eluent: PE:EA=20:1), [α]<sub>D</sub><sup>20</sup> = -91.26 (*c* = 1.0 in CHCl<sub>3</sub>); 95% *ee*, determined by HPLC analysis (Chiralpak IC-3 column, *n*-hexane/*i*-PrOH = 85:15 (v/v), flow rate 1.0 mL/min, λ = 254 nm, 25 °C), *t<sub>R</sub>* (major) = 14.30 min; *t<sub>R</sub>* (major) = 18.92 min; <sup>1</sup>H NMR (400 MHz, CDCl<sub>3</sub>) δ 8.62 (d, *J* = 5.8 Hz, 2H), 8.09-8.06 (m, 1H), 8.02-7.98 (m, 1H), 7.78-7.74 (m, 2H), 7.23-7.19 (m, 2H), 7.17-7.08 (m, 4H), 7.02 (d, *J* = 8.8 Hz, 1H), 6.92-6.89 (m, 1H), 6.79-6.75 (m, 1H), 4.04 (s, 3H), 3.94 (s, 3H), 0.17 (s, 3H), -0.02 (s, 3H) ppm. <sup>13</sup>C NMR (126 MHz, CDCl<sub>3</sub>) δ 167.26, 160.02, 154.66, 144.36, 141.85, 139.04, 137.88, 134.44, 133.86, 132.84, 132.46, 131.08, 129.95, 128.72, 128.68, 128.67, 127.74, 127.46, 127.24, 126.77, 125.50, 119.50, 115.42, 107.44, 55.86, 52.34, -1.25, -1.85 ppm. HRMS (ESI) calcd. for C<sub>30</sub>H<sub>27</sub>NO<sub>3</sub>Si<sup>+</sup> [M+H]<sup>+</sup> *m/z* 478.1833, found 478.1836.

**(*R*)-1-(2-(Triethylsilyl)naphthalen-1-yl)isoquinoline (2m).**

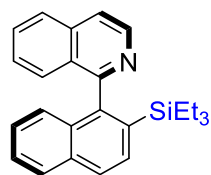

White solid, 86% (31.7 mg) isolated yield (eluent: PE:EA=10:1), [α]<sub>D</sub><sup>20</sup> = -42.88 (*c* = 1.0 in CHCl<sub>3</sub>); 99% *ee*, determined by HPLC analysis (Chiralpak IC-3 column, *n*-hexane/*i*-PrOH = 96:4 (v/v), flow rate 1.0 mL/min, λ = 254 nm, 25 °C), *t<sub>R</sub>* (major) = 5.30 min; *t<sub>R</sub>* (minor) = 6.01 min; <sup>1</sup>H NMR (500 MHz, Chloroform-*d*) δ 8.69 (d, *J* = 5.7 Hz, 1H), 7.99-7.87 (m, 3H), 7.82-7.76 (m, 2H), 7.69-7.62 (m, 1H), 7.46-7.39 (m, 1H), 7.42-7.36 (m, 1H), 7.37-7.30 (m, 1H), 7.23-7.16 (m, 1H), 6.97 (d, *J* = 8.6 Hz, 1H), 0.72 (t, *J* = 7.9 Hz, 9H), 0.39-0.11 (m, 6H) ppm. <sup>13</sup>C NMR (101 MHz, CDCl<sub>3</sub>) δ 161.91, 144.10, 142.28, 135.97, 135.05, 133.59, 132.73, 131.52, 130.32, 129.49, 128.15, 127.90, 127.20, 127.10, 126.88, 126.39,

126.24, 126.11, 120.59, 7.51, 3.51 ppm. **HRMS** (ESI) calcd. for  $C_{25}H_{28}NSi^+$   $[M+H]^+$   $m/z$  370.1986, found 370.1992.

**(R)-1-(2-(Tributylsilyl)naphthalen-1-yl)isoquinoline (2n).**

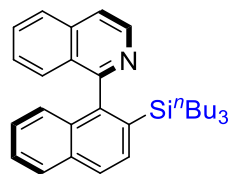

Colorless oil, 66% (29.9 mg) isolated yield (eluent: PE:EA=20:1),  $[\alpha]_D^{20} = -45.69$  ( $c = 1.0$  in  $CHCl_3$ ); 99% *ee*, determined by HPLC analysis (Chiralpak IC-3 column, *n*-hexane/*i*-PrOH = 99:1 (v/v), flow rate 0.2 mL/min,  $\lambda = 254$  nm, 25 °C),  $t_R$  (major) = 20.50 min;  $t_R$  (major) = 21.59 min;  **$^1H$  NMR (500 MHz,  $CDCl_3$ )** 8.69 (d,  $J = 5.7$  Hz, 1H), 7.97-7.87 (m, 3H), 7.81-7.75 (m, 2H), 7.69-7.62 (m, 1H), 7.45-7.37 (m, 2H), 7.36-7.31 (m, 1H), 7.23-7.16 (m, 1H), 6.99 (d,  $J = 8.5$  Hz, 1H), 1.13-0.96 (m, 12H), 0.73 (t,  $J = 6.9$  Hz, 9H), 0.36-0.11 (m, 6H) ppm.  **$^{13}C$  NMR (126 MHz,  $CDCl_3$ )**  $\delta$  161.96, 143.95, 142.39, 136.09, 135.77, 133.55, 132.70, 131.55, 130.26, 129.50, 128.21, 127.90, 127.17, 127.09, 126.84, 126.45, 126.20, 126.09, 120.52, 26.73, 26.03, 13.74, 12.47 ppm. **HRMS** (ESI) calcd. for  $C_{31}H_{40}NSi^+$   $[M+H]^+$   $m/z$  454.2925, found 454.2927.

**(R)-1-(2-(methylphenylsilyl)naphthalen-1-yl)isoquinoline (2o).**

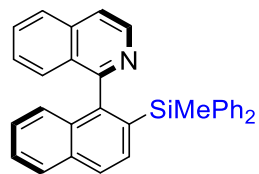

Colorless oil, 82% (36.9 mg) isolated yield (eluent: PE:EA=20:1),  $[\alpha]_D^{20} = -26.76$  ( $c = 1.0$  in  $CHCl_3$ ); 98% *ee*, determined by HPLC analysis (Chiralpak IC-3 column, *n*-hexane/*i*-PrOH = 96:4 (v/v), flow rate 1.0 mL/min,  $\lambda = 254$  nm, 25 °C),  $t_R$  (major) = 7.07 min;  $t_R$  (major) = 14.01 min;  **$^1H$  NMR (500 MHz,  $CDCl_3$ )**  $\delta$  8.48 (d,  $J = 5.7$  Hz, 1H), 7.90 (t,  $J = 8.2$  Hz, 2H), 7.70 (dd,  $J = 8.4, 4.6$  Hz, 2H), 7.53-7.49 (m, 2H), 7.47-7.44 (m, 1H), 7.33-7.31 (m, 2H), 7.26-7.05 (m, 11H), 7.00-6.99 (m, 1H), 0.17 (s, 3H) ppm.  **$^{13}C$  NMR (126 MHz,  $CDCl_3$ )**  $\delta$  161.08, 144.95, 142.00, 136.76, 135.96, 135.79, 135.09, 134.93, 133.94, 133.84, 132.72, 132.62, 129.92, 129.12, 128.89, 128.80, 128.02, 127.90, 127.55, 127.38, 126.87, 126.66, 126.62, 126.54, 126.31, 120.77, -2.58 ppm. **HRMS** (ESI) calcd. for  $C_{32}H_{26}NSi^+$   $[M+H]^+$   $m/z$  452.1829, found 454.2927.

**(R)-1-(2-(Dimethyl(phenyl)silyl)naphthalen-1-yl)-4-methoxyphthalazine (2p).**

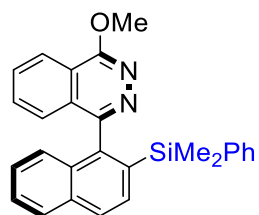

White solid, 73% (30.9 mg) isolated yield (eluent: PE:EA=10:1),  $[\alpha]_D^{20} = -83.39$  ( $c = 1.0$  in  $CHCl_3$ ); 97% *ee*, determined by HPLC analysis (Chiralpak IA-3 column, *n*-hexane/*i*-PrOH = 90:10 (v/v), flow rate 1.0 mL/min,  $\lambda = 254$  nm, 25 °C),  $t_R$  (major) = 12.59 min;  $t_R$  (major) = 23.51

min; **<sup>1</sup>H NMR (400 MHz, CDCl<sub>3</sub>)** δ 8.04 (d, *J* = 8.2 Hz, 1H), 7.98 (d, *J* = 8.4 Hz, 1H), 7.90 (d, *J* = 8.4 Hz, 1H), 7.82 (d, *J* = 8.4 Hz, 1H), 7.64 (t, *J* = 7.8 Hz, 1H), 7.43 (dt, *J* = 15.3, 7.6 Hz, 2H), 7.20 (t, *J* = 7.8 Hz, 1H), 7.03 (d, *J* = 8.0 Hz, 3H), 7.00-6.95 (m, 2H), 6.86 (t, *J* = 7.4 Hz, 2H), 4.36 (s, 3H), 0.41 (s, 3H), 0.31 (s, 3H) ppm. **<sup>13</sup>C NMR (101 MHz, CDCl<sub>3</sub>)** δ 160.41, 157.75, 140.88, 137.43, 137.02, 133.73, 133.59, 132.86, 131.54, 131.36, 131.20, 129.98, 128.34, 128.06, 128.03, 126.97, 126.49, 126.39, 126.38, 126.30, 122.85, 119.29, 55.01, -0.76, -1.23 ppm. **HRMS (ESI)** calcd. for C<sub>27</sub>H<sub>24</sub>N<sub>2</sub>NaOSi<sup>+</sup> [M+Na]<sup>+</sup> *m/z* 443.1550, found 443.1549.

**(R)-1-(2-(Dimethyl(phenyl)silyl)naphthalen-1-yl)-4-ethoxyphthalazine (2q).**

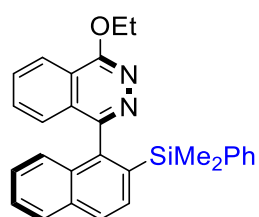

White solid, 56% (24.4 mg) isolated yield (eluent: PE:EA=10:1), [α]<sub>D</sub><sup>20</sup> = -67.83 (*c* = 1.0 in CHCl<sub>3</sub>); 96% *ee*, determined by HPLC analysis (Chiralpak IC-3 column, *n*-hexane/*i*-PrOH = 90:10 (v/v), flow rate 1.0 mL/min, λ = 254 nm, 25 °C), *t<sub>R</sub>* (major) = 9.97 min; *t<sub>R</sub>* (minor) = 18.25 min; **<sup>1</sup>H NMR (500 MHz, Chloroform-*d*)** δ 8.08 (d, *J* = 8.3, 1.0 Hz, 1H), 7.98 (d, *J* = 8.3, 0.9 Hz, 1H), 7.93-7.87 (m, 1H), 7.81 (d, *J* = 8.4 Hz, 1H), 7.67-7.61 (m, 1H), 7.46-7.38 (m, 2H), 7.23-7.18 (m, 1H), 7.09-6.93 (m, 5H), 6.87 (t, *J* = 7.5 Hz, 2H), 4.82 (qd, *J* = 7.0, 1.8 Hz, 2H), 1.63 (t, *J* = 7.1 Hz, 3H), 0.40 (s, 3H), 0.30 (s, 3H) ppm. **<sup>13</sup>C NMR (126 MHz, CDCl<sub>3</sub>)** δ 160.18, 157.45, 140.99, 137.42, 137.14, 133.73, 133.60, 132.87, 131.47, 131.39, 131.10, 129.98, 128.34, 128.05, 127.99, 127.02, 126.48, 126.41, 126.35, 126.28, 122.93, 119.36, 63.41, 14.86, -0.75, -1.25 ppm. **HRMS (ESI)** calcd. for C<sub>28</sub>H<sub>27</sub>N<sub>2</sub>OSi<sup>+</sup> [M+H]<sup>+</sup> *m/z* 435.1887, found 435.1888.

**(R)-1-(2-(Dimethyl(phenyl)silyl)naphthalen-1-yl)-4-isopropoxyphthalazine (2r).**

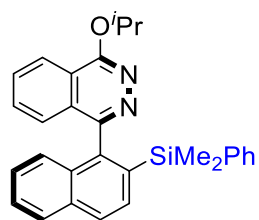

White solid, 90% (41.7 mg) isolated yield (eluent: PE:EA=20:1), [α]<sub>D</sub><sup>20</sup> = -81.86 (*c* = 1.0 in CHCl<sub>3</sub>); 96% *ee*, determined by HPLC analysis (Chiralpak IC-3 column, *n*-hexane/*i*-PrOH = 90:10 (v/v), flow rate 1.0 mL/min, λ = 254 nm, 25 °C), *t<sub>R</sub>* (minor) = 36.14 min; *t<sub>R</sub>* (major) = 38.43 min; **<sup>1</sup>H NMR (500 MHz, Chloroform-*d*)** δ 8.06 (d, *J* = 8.2 Hz, 1H), 7.98 (d, *J* = 8.3 Hz, 1H), 7.90 (d, *J* = 8.2 Hz, 1H), 7.82 (d, *J* = 8.3 Hz, 1H), 7.62 (t, *J* = 7.6 Hz, 1H), 7.48-7.41 (m, 1H), 7.42-7.35 (m, 1H), 7.24-7.17 (m, 1H), 7.10-7.02 (m, 3H), 7.00-6.92 (m, 2H), 6.86 (t, *J* = 7.4 Hz, 2H), 5.87 (hept, *J* = 6.0 Hz, 1H), 1.64 (d, *J* = 6.1 Hz, 3H), 1.57 (d, *J* = 6.1 Hz, 3H), 0.41 (s, 3H), 0.33 (s, 3H) ppm. **<sup>13</sup>C NMR (126 MHz, CDCl<sub>3</sub>)** δ 159.70, 157.01, 141.16, 137.43, 137.14, 133.72, 133.54,

132.88, 131.39, 131.32, 130.94, 129.99, 128.30, 128.03, 127.93, 127.03, 126.47, 126.44, 126.33, 126.22, 122.99, 119.65, 69.89, 22.32, -0.72, -1.26 ppm. **HRMS** (ESI) calcd. for C<sub>29</sub>H<sub>29</sub>N<sub>2</sub>OSi<sup>+</sup> [M+H]<sup>+</sup> m/z 449.2044, found 449.2046.

**(R)-1-(2-(dimethyl(phenyl)silyl)naphthalen-1-yl)-4-(3,3-dimethylbutoxy)phthalazine (2s).**

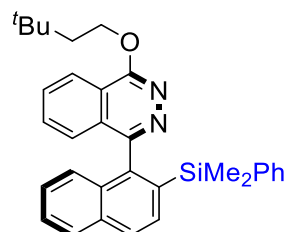

White solid, 80% (39.2 mg) isolated yield (eluent: PE:EA=20:1),  $[\alpha]_{\text{D}}^{20} = -54.38$  ( $c = 1.0$  in CHCl<sub>3</sub>); 97% *ee*, determined by HPLC analysis (Chiralpak IC-3 column, *n*-hexane/*i*-PrOH = 90:10 (v/v), flow rate 1.0 mL/min,  $\lambda = 254$  nm, 25 °C),  $t_{\text{R}}$  (major) = 6.93 min;  $t_{\text{R}}$  (minor) = 17.84 min; **<sup>1</sup>H NMR (500 MHz, Chloroform-*d*)**  $\delta$  8.05 (d,  $J = 8.2$  Hz, 1H), 7.98 (d,  $J = 8.3$  Hz, 1H), 7.90 (d,  $J = 8.2$  Hz, 1H), 7.81 (d,  $J = 8.4$  Hz, 1H), 7.67-7.60 (m, 1H), 7.48-7.37 (m, 2H), 7.24-7.17 (m, 1H), 7.08-7.01 (m, 3H), 7.02-6.94 (m, 2H), 6.88 (t,  $J = 7.4$  Hz, 2H), 4.86-4.75 (m, 2H), 1.96 (t,  $J = 7.1$  Hz, 2H), 1.13 (s, 9H), 0.40 (s, 3H), 0.30 (s, 3H) ppm. **<sup>13</sup>C NMR (126 MHz, CDCl<sub>3</sub>)**  $\delta$  161.50, 158.64, 142.22, 138.60, 138.40, 134.95, 134.86, 134.11, 132.69, 132.61, 132.37, 131.22, 129.57, 129.28, 129.21, 128.25, 127.71, 127.66, 127.59, 127.50, 124.16, 120.62, 66.54, 43.80, 31.40, 31.30, 0.49, 0.00 ppm. **HRMS** (ESI) calcd. for C<sub>32</sub>H<sub>35</sub>N<sub>2</sub>OSi<sup>+</sup> [M+H]<sup>+</sup> m/z 491.2513, found 491.2517.

**(R)-1-(Cyclohexyloxy)-4-(2-(dimethyl(phenyl)silyl)naphthalen-1-yl)phthalazine (2t).**

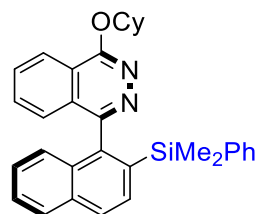

White solid, 86% (42.2 mg) isolated yield (eluent: PE:EA=20:1),  $[\alpha]_{\text{D}}^{20} = -60.74$  ( $c = 1.0$  in CHCl<sub>3</sub>); 96% *ee*, determined by HPLC analysis (Chiralpak IC-3 column, *n*-hexane/*i*-PrOH = 90:10 (v/v), flow rate 1.0 mL/min,  $\lambda = 254$  nm, 25 °C),  $t_{\text{R}}$  (major) = 6.41 min;  $t_{\text{R}}$  (major) = 13.42 min; **<sup>1</sup>H NMR (400 MHz, CDCl<sub>3</sub>)**  $\delta$  8.11-8.04 (m, 1H), 8.01-7.94 (m, 1H), 7.93-7.86 (m, 1H), 7.82 (d,  $J = 8.3$  Hz, 1H), 7.66-7.57 (m, 1H), 7.48-7.40 (m, 1H), 7.42-7.34 (m, 1H), 7.25-7.16 (m, 1H), 7.09-7.00 (m, 3H), 7.01-6.90 (m, 2H), 6.89-6.81 (m, 2H), 5.65 (tt,  $J = 8.5, 3.8$  Hz, 1H), 2.35-2.16 (m, 2H), 1.97-1.74 (m, 5H), 1.68-1.48 (m, 3H), 0.41 (s, 3H), 0.33 (s, 3H) ppm. **<sup>13</sup>C NMR (126 MHz, CDCl<sub>3</sub>)**  $\delta$  159.65, 156.98, 141.15, 137.40, 137.12, 133.71, 133.55, 132.89, 131.37, 131.32, 130.94, 130.05, 128.29, 128.03, 127.92, 127.04, 126.48, 126.44, 126.33, 126.22, 123.02, 119.73, 74.46, 31.92, 31.88, 25.95, 24.03, 23.97, -0.72, -1.23 ppm. **HRMS** (ESI) calcd. for C<sub>32</sub>H<sub>33</sub>N<sub>2</sub>OSi<sup>+</sup> [M+H]<sup>+</sup> m/z 489.2357, found 489.2357.

**(R)-1-(But-3-en-1-yloxy)-4-(2-(dimethyl(phenyl)silyl)naphthalen-1-yl)phthalazine (2u).**

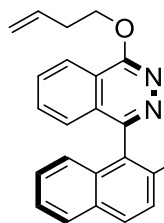

Colorless oil, 78% (35.8 mg) isolated yield (eluent: PE:EA=20:1),  $[\alpha]_{\text{D}}^{20} = -67.47$  ( $c = 1.0$  in  $\text{CHCl}_3$ ); 97% *ee*, determined by HPLC analysis (Chiralpak IC-3 column, *n*-hexane/*i*-PrOH = 90:10 (v/v), flow rate 1.0 mL/min,  $\lambda = 254$  nm, 25 °C),  $t_{\text{R}}$  (major) = 9.64 min;  $t_{\text{R}}$  (minor) = 19.31

min;  $^1\text{H NMR}$  (500 MHz, Chloroform-*d*)  $\delta$  8.09-8.04 (m, 1H), 8.00-7.96 (m, 1H), 7.92-7.88 (m, 1H), 7.82 (d,  $J = 8.3$  Hz, 1H), 7.66-7.62 (m, 1H), 7.47-7.39 (m, 2H), 7.23-7.19 (m, 1H), 7.07-7.02 (m, 3H), 7.00-6.95 (m, 2H), 6.87 (t,  $J = 7.5$  Hz, 2H), 6.08 (ddt,  $J = 17.0, 10.2, 6.7$  Hz, 1H), 5.32 (dq,  $J = 17.2, 1.7$  Hz, 1H), 5.21 (dq,  $J = 10.2, 1.3$  Hz, 1H), 4.82 (t,  $J = 6.6$  Hz, 2H), 2.81-2.76 (m, 2H), 0.41 (s, 3H), 0.31 (s, 3H) ppm.  $^{13}\text{C NMR}$  (126 MHz,  $\text{CDCl}_3$ )  $\delta$  160.13, 157.58, 140.89, 137.41, 137.06, 134.86, 133.72, 133.57, 132.84, 131.53, 131.36, 131.17, 130.00, 128.34, 128.05, 128.01, 127.01, 126.48, 126.37, 126.29, 122.87, 119.31, 117.22, 66.58, 33.64, -0.76, -1.24 ppm. HRMS (ESI) calcd. for  $\text{C}_{30}\text{H}_{29}\text{N}_2\text{OSi}^+$   $[\text{M}+\text{H}]^+$   $m/z$  461.2044, found 461.2045.

**(R)-1-(2-(Dimethyl(phenyl)silyl)naphthalen-1-yl)-4-((4-methylbenzyl)oxy)phthalazine (2v).**

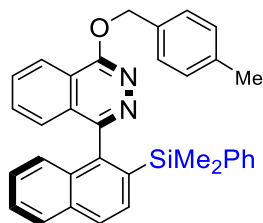

White solid, 78% (38.8 mg) isolated yield (eluent: PE:EA=12:1),  $[\alpha]_{\text{D}}^{20} = -67.84$  ( $c = 1.0$  in  $\text{CHCl}_3$ ); 97% *ee*, determined by HPLC analysis (Chiralpak IC-3 column, *n*-hexane/*i*-PrOH = 90:10 (v/v), flow rate 1.0 mL/min,  $\lambda = 254$  nm, 25 °C),  $t_{\text{R}}$  (major) = 11.28 min;  $t_{\text{R}}$  (major) = 19.31

min;  $^1\text{H NMR}$  (500 MHz, Chloroform-*d*)  $\delta$  8.08 (d,  $J = 8.2$  Hz, 1H), 7.99 (d,  $J = 8.2$  Hz, 1H), 7.91 (d,  $J = 8.2$  Hz, 1H), 7.84 (d,  $J = 8.3$  Hz, 1H), 7.64-7.57 (m, 3H), 7.47-7.43 (m, 1H), 7.42-7.38 (m, 1H), 7.30 (d,  $J = 7.6$  Hz, 2H), 7.23-7.19 (m, 1H), 7.06 (d,  $J = 8.6$  Hz, 1H), 7.02-6.93 (m, 4H), 6.81 (t,  $J = 7.4$  Hz, 2H), 5.77 (q,  $J = 12.1$  Hz, 2H), 2.43 (s, 3H), 0.42 (s, 3H), 0.34 (s, 3H) ppm.  $^{13}\text{C NMR}$  (126 MHz,  $\text{CDCl}_3$ )  $\delta$  160.07, 157.82, 140.89, 138.13, 137.53, 136.97, 134.07, 133.74, 133.57, 132.85, 131.57, 131.37, 131.17, 130.04, 129.38, 128.82, 128.33, 128.07, 128.06, 126.99, 126.51, 126.40, 126.32, 122.99, 119.34, 69.14, 21.44, -0.73, -1.20 ppm. HRMS (ESI) calcd. for  $\text{C}_{34}\text{H}_{31}\text{N}_2\text{OSi}^+$   $[\text{M}+\text{H}]^+$   $m/z$  511.2200, found 511.2200.

## 2.4 Inefficient heterobiaryl triflates or silylation reagent.

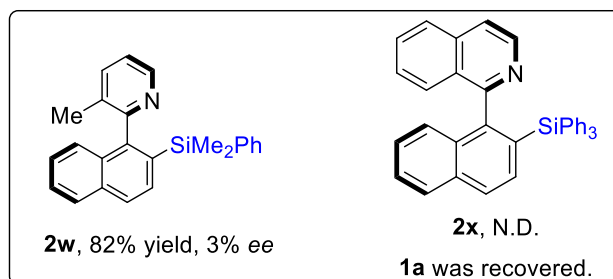

### (*R*)-2-(2-(Dimethyl(phenyl)silyl)naphthalen-1-yl)-3-methylpyridine (**2w**).

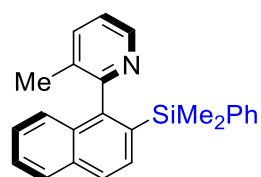

Colorless oil, 82% (28.9 mg) isolated yield (eluent: PE:EA=10:1),  $[\alpha]_{\text{D}}^{20} = -11.13$  ( $c = 1.0$  in  $\text{CHCl}_3$ ); 3% *ee*, determined by HPLC analysis (Chiralpak IC-3 column, *n*-hexane/*i*-PrOH = 90:10 (v/v), flow rate 1.0 mL/min,  $\lambda = 254$  nm, 25 °C),  $t_{\text{R}}$  (major) = 5.19 min;  $t_{\text{R}}$  (major) = 8.58 min;  **$^1\text{H NMR}$  (400 MHz, Chloroform-*d*)**  $\delta$  8.56 (d,  $J = 4.9$  Hz, 1H), 7.88-7.81 (m, 2H), 7.69 (d,  $J = 8.3$  Hz, 1H), 7.62-7.37 (m, 3H), 7.38-7.31 (m, 3H), 7.35-7.25 (m, 4H), 7.27-7.20 (m, 3H), 7.09 (d,  $J = 8.5$  Hz, 1H), 1.74 (s, 3H), 0.36 (s, 3H), 0.17 (s, 3H) ppm.  **$^{13}\text{C NMR}$  (101 MHz,  $\text{CDCl}_3$ )**  $\delta$  159.20, 146.71, 145.38, 138.87, 137.36, 134.06, 133.92, 133.71, 133.16, 131.64, 131.52, 128.81, 128.17, 127.63, 127.09, 126.42, 126.35, 125.47, 123.04, 19.01, -0.99, -1.80 ppm. **HRMS** (ESI) calcd. for  $\text{C}_{24}\text{H}_{24}\text{NSi}^+$   $[\text{M}+\text{H}]^+$   $m/z$  354.1673, found 354.1674.

## 2.5 Crystal data of compounds **2r**.

The crystals suitable for single-crystal structure analysis was obtained via evaporation method of compounds **2r** DCM/*n*-Hexane. The absolute configuration of the **2r** was determined to be *R* configuration via X-ray crystal structure analysis (CCDC number: 2492180).

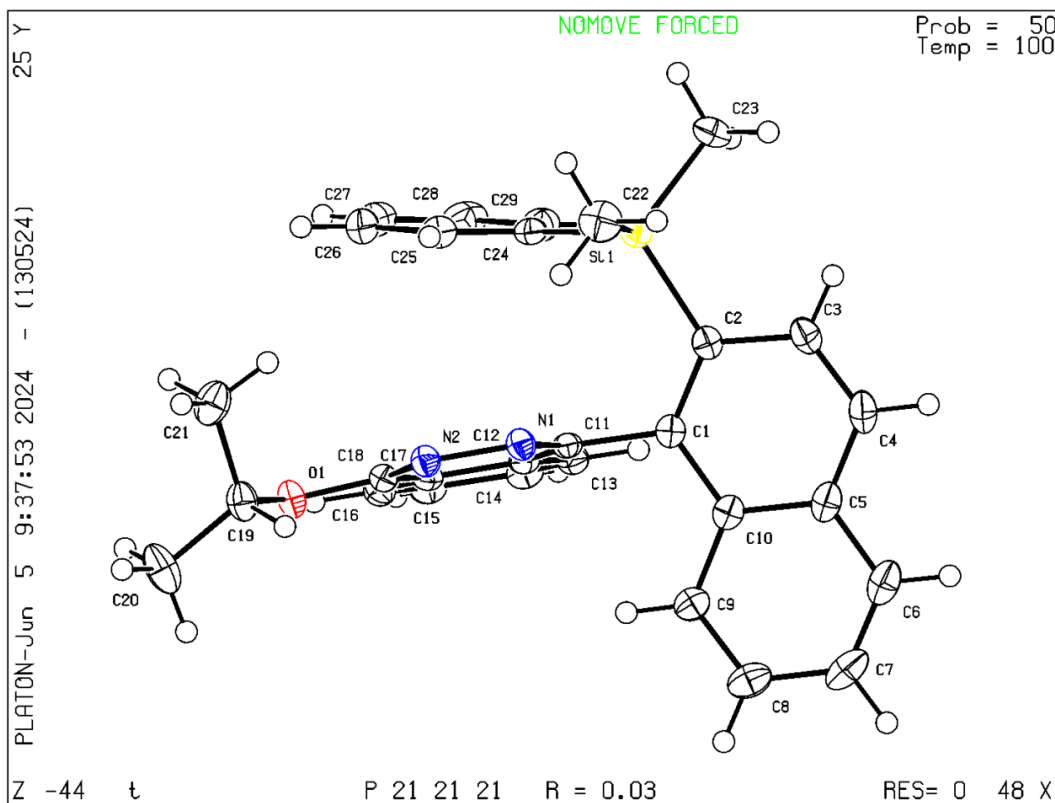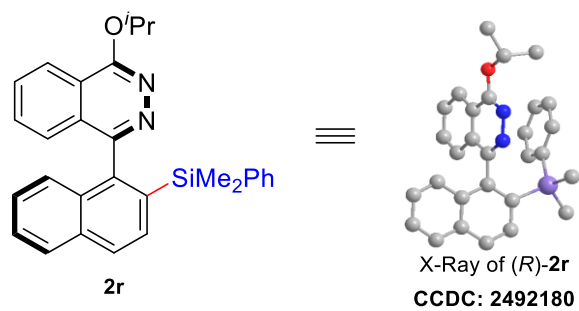

**Figure S1.** X-ray crystal structure of (*R*)-**2r**

**Table S11. Crystal data and structure refinement for 2r**

|                                   |                                                                |          |
|-----------------------------------|----------------------------------------------------------------|----------|
| Identification code               | <b>2r</b>                                                      |          |
| Empirical formula                 | C <sub>29</sub> H <sub>28</sub> N <sub>2</sub> O <sub>Si</sub> |          |
| Formula weight                    | 448.62                                                         |          |
| Temperature                       | 100(2) K                                                       |          |
| Wavelength                        | 1.54184 Å                                                      |          |
| Crystal system                    | Orthorhombic                                                   |          |
| Space group                       | P2 <sub>1</sub> 2 <sub>1</sub> 2 <sub>1</sub>                  |          |
| Unit cell dimensions              | a = 11.12920(10) Å                                             | α = 90°. |
|                                   | b = 12.8003(2) Å                                               | β = 90°. |
|                                   | c = 16.8233(2) Å                                               | γ = 90°. |
| Volume                            | 2396.60(5) Å <sup>3</sup>                                      |          |
| Z                                 | 4                                                              |          |
| Density (calculated)              | 1.243 Mg/m <sup>3</sup>                                        |          |
| Absorption coefficient            | 1.042 mm <sup>-1</sup>                                         |          |
| F(000)                            | 952                                                            |          |
| Crystal size                      | 0.180 x 0.160 x 0.140 mm <sup>3</sup>                          |          |
| Theta range for data collection   | 4.340 to 76.348°.                                              |          |
| Index ranges                      | -8<=h<=13, -16<=k<=16, -21<=l<=20                              |          |
| Reflections collected             | 29026                                                          |          |
| Independent reflections           | 4951 [R(int) = 0.0269]                                         |          |
| Completeness to theta = 67.684°   | 99.7 %                                                         |          |
| Absorption correction             | Semi-empirical from equivalents                                |          |
| Max. and min. transmission        | 1.00000 and 0.83897                                            |          |
| Refinement method                 | Full-matrix least-squares on F <sup>2</sup>                    |          |
| Data / restraints / parameters    | 4951 / 0 / 303                                                 |          |
| Goodness-of-fit on F <sup>2</sup> | 1.036                                                          |          |
| Final R indices [I>2σ(I)]         | R1 = 0.0273, wR2 = 0.0687                                      |          |
| R indices (all data)              | R1 = 0.0294, wR2 = 0.0696                                      |          |
| Absolute structure parameter      | -0.003(7)                                                      |          |
| Extinction coefficient            | 0.00080(18)                                                    |          |
| Largest diff. peak and hole       | 0.168 and -0.203 e.Å <sup>-3</sup>                             |          |

## References

- [1] Jiang, X.; Xiong, W.; Deng, S.; Lu, F.-D.; Jia, Y.; Yang, Q.; Xue, L.-Y.; Qi, X.; Tunge, J. A.; Lu, L.-Q.; Xiao, W.-J. Construction of axial chirality *via* asymmetric radical trapping by cobalt under visible light. *Nat. Catal.* **2022**, *5*, 788.
- [2] (a) Su, L.; Gao, S.; Liu, J. Enantioconvergent synthesis of axially chiral amides enabled by Pd-catalyzed dynamic kinetic asymmetric aminocarbonylation *Nat. Commun.* **2024**, *15*, 7248. (b) Gao, S.; Su, L.; Liu, J. Diastereo- and Enantioselective Pd-Catalyzed C–P Coupling for Axially and P-Chiral Phosphine Oxides *via* Simultaneous Dynamic Kinetic Asymmetric Transformation and Kinetic Resolution *J. Am. Chem. Soc.* **2025**, *147*, 23946.

# NMR Spectra

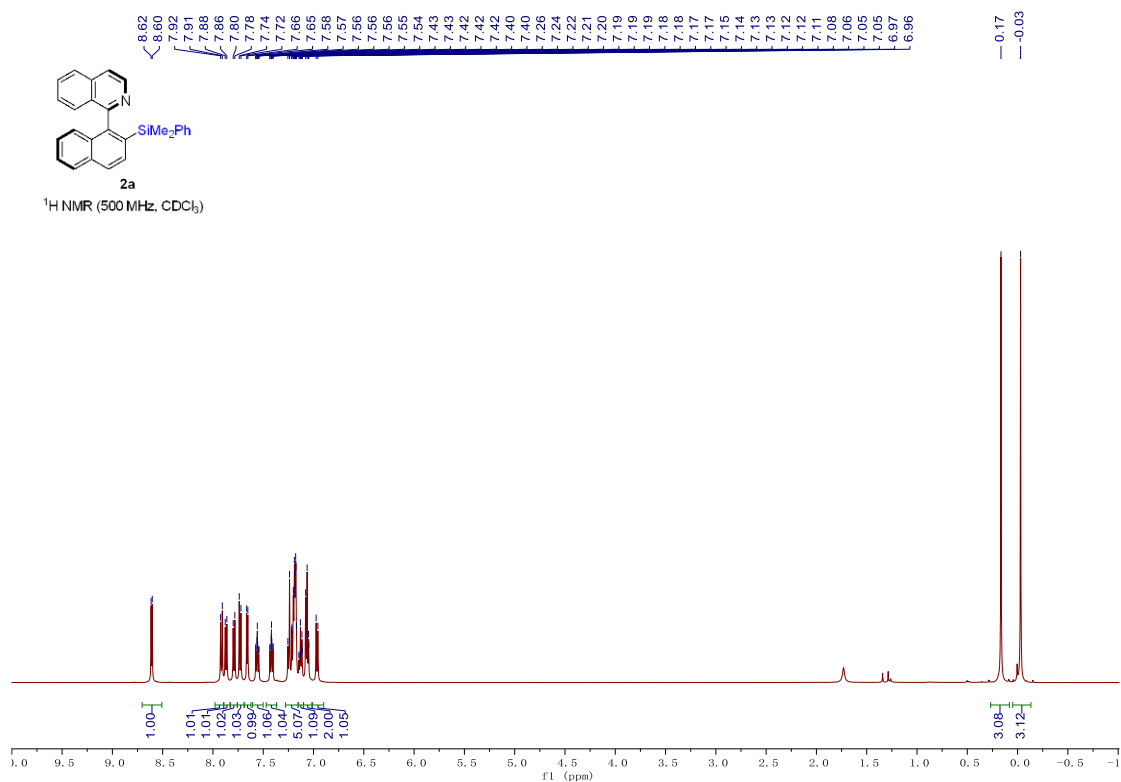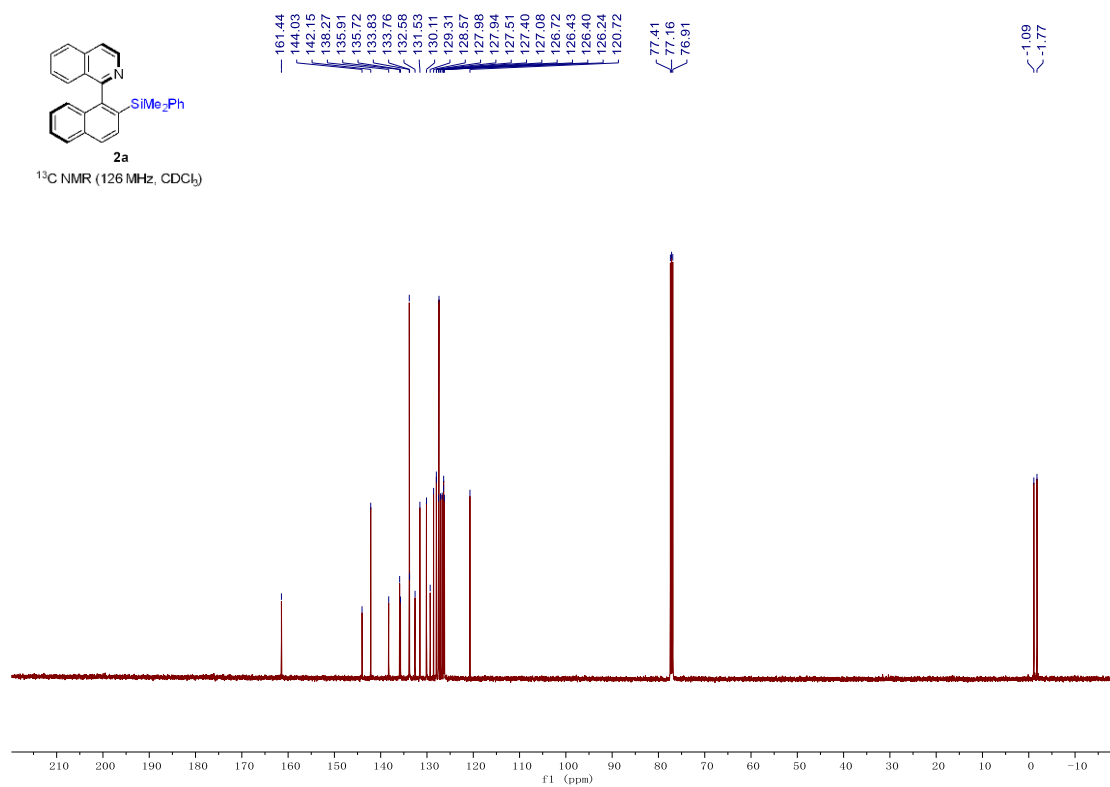

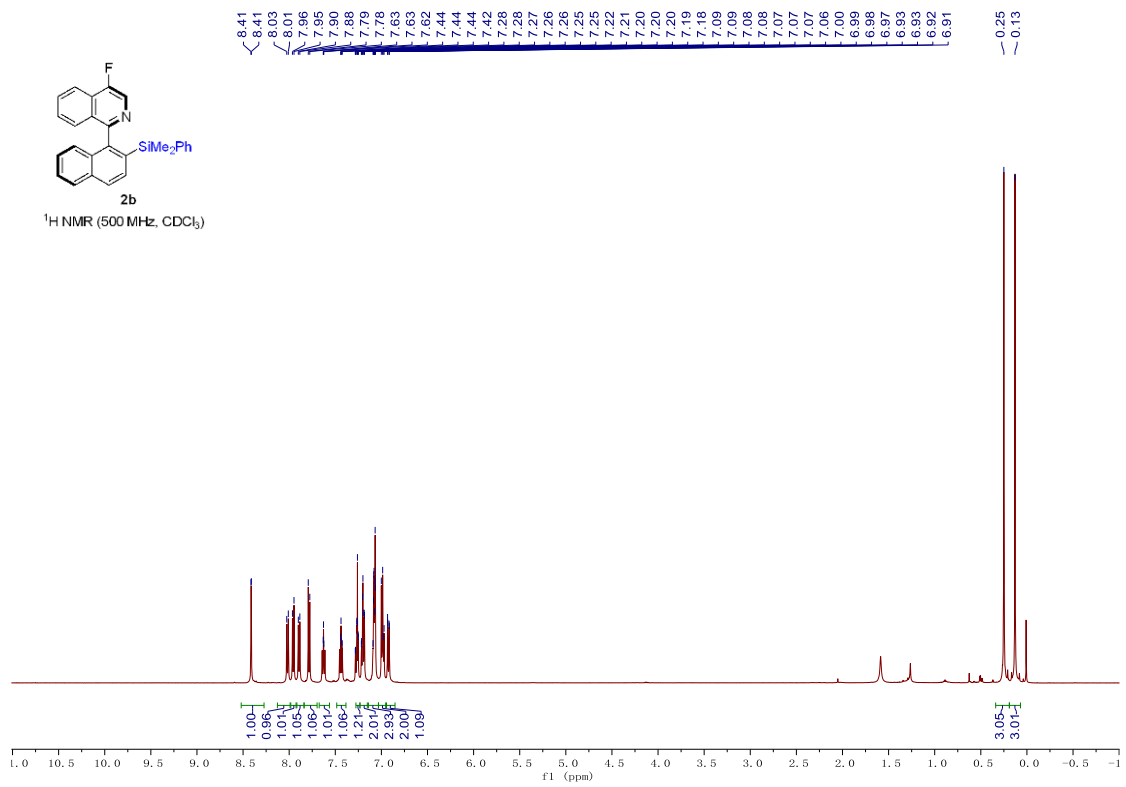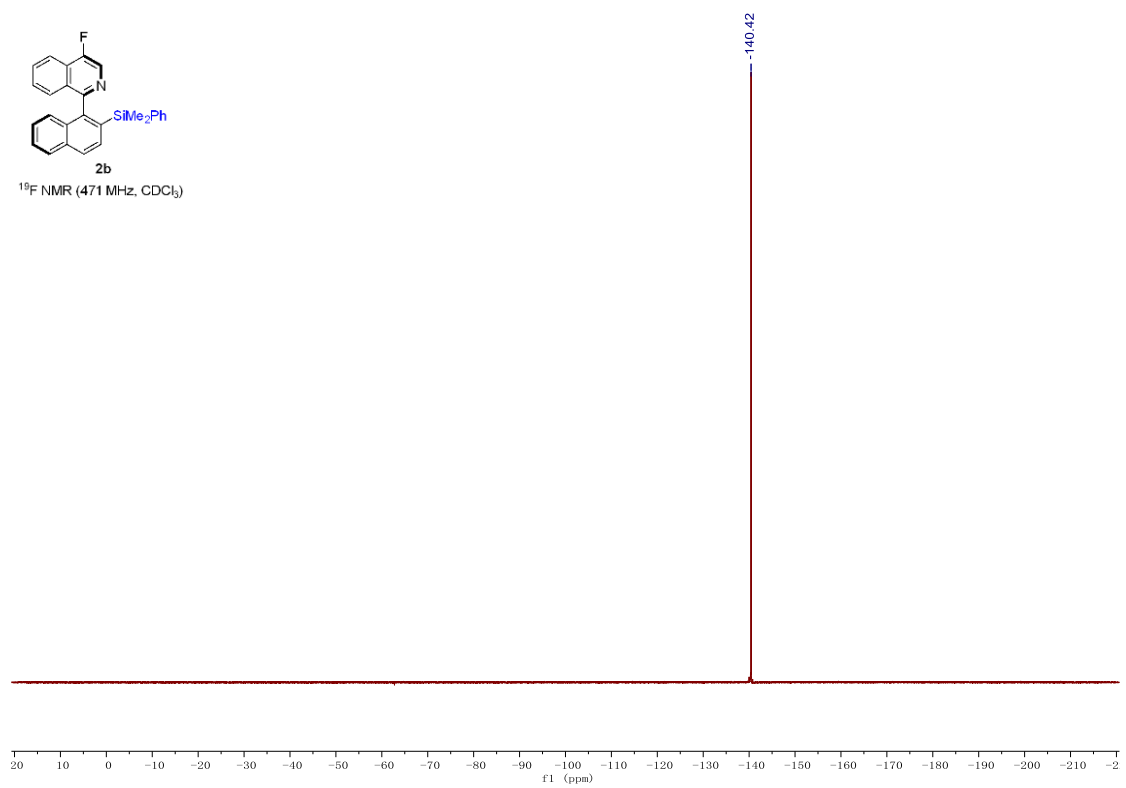

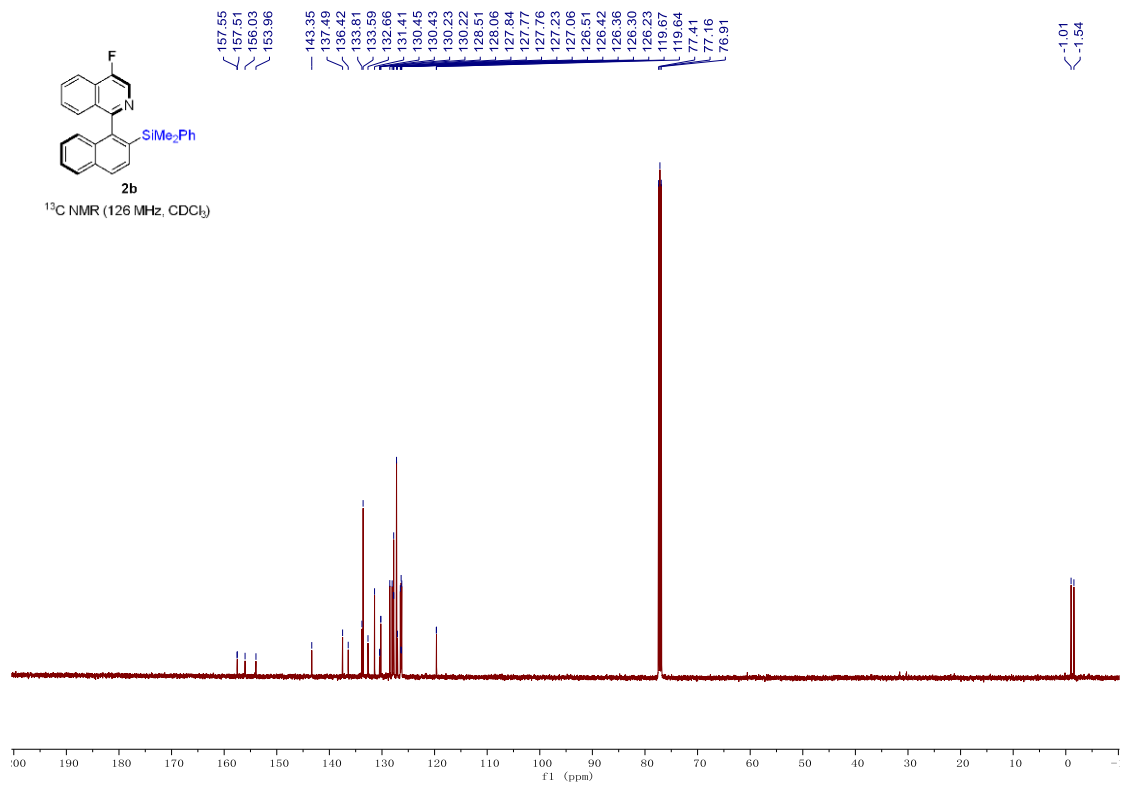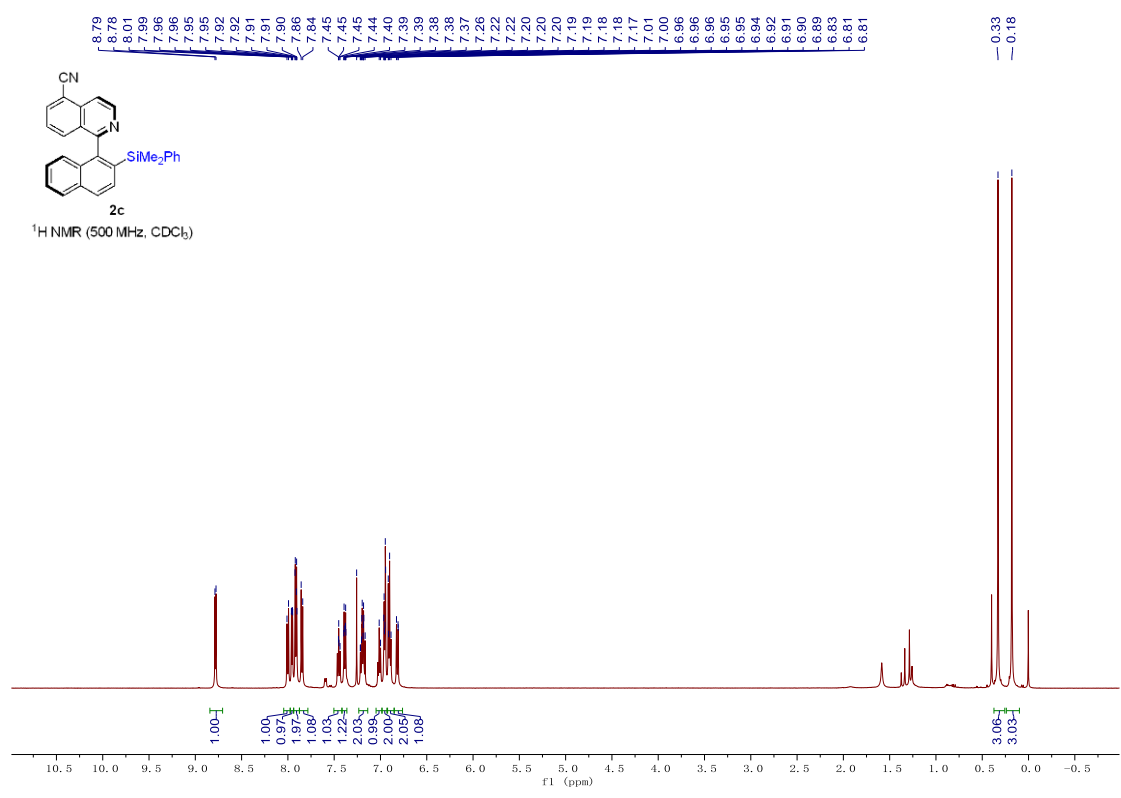

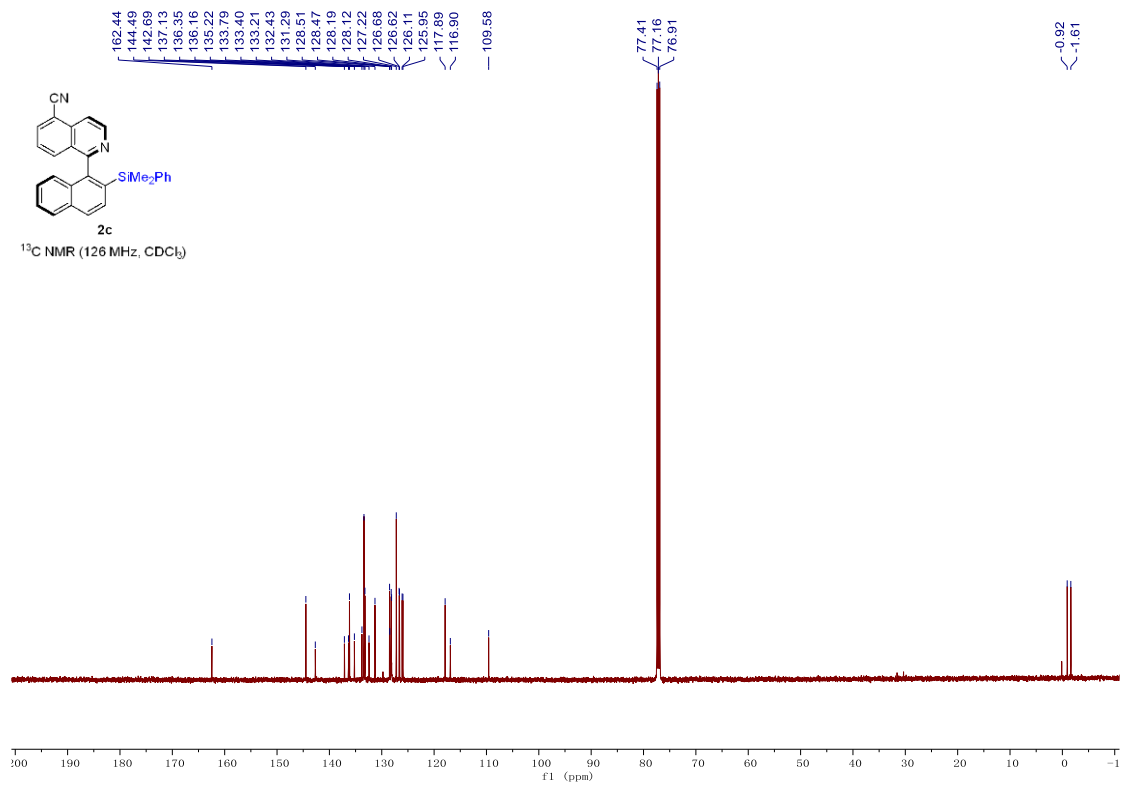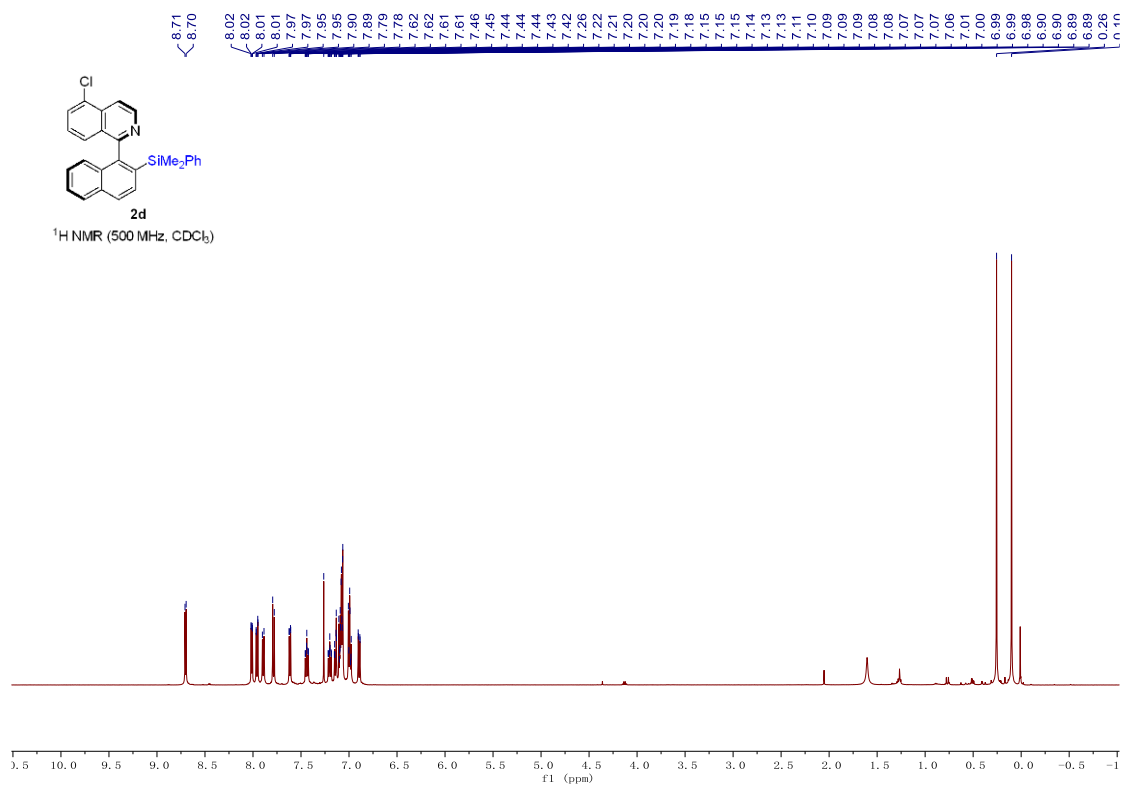

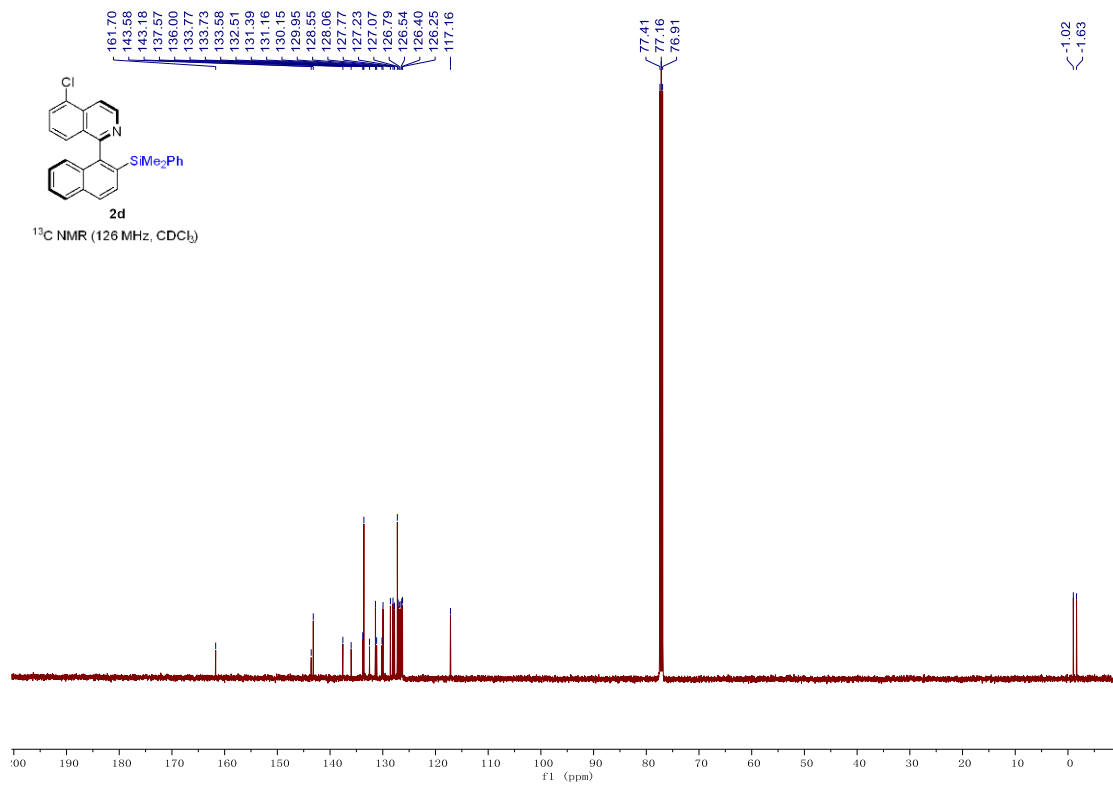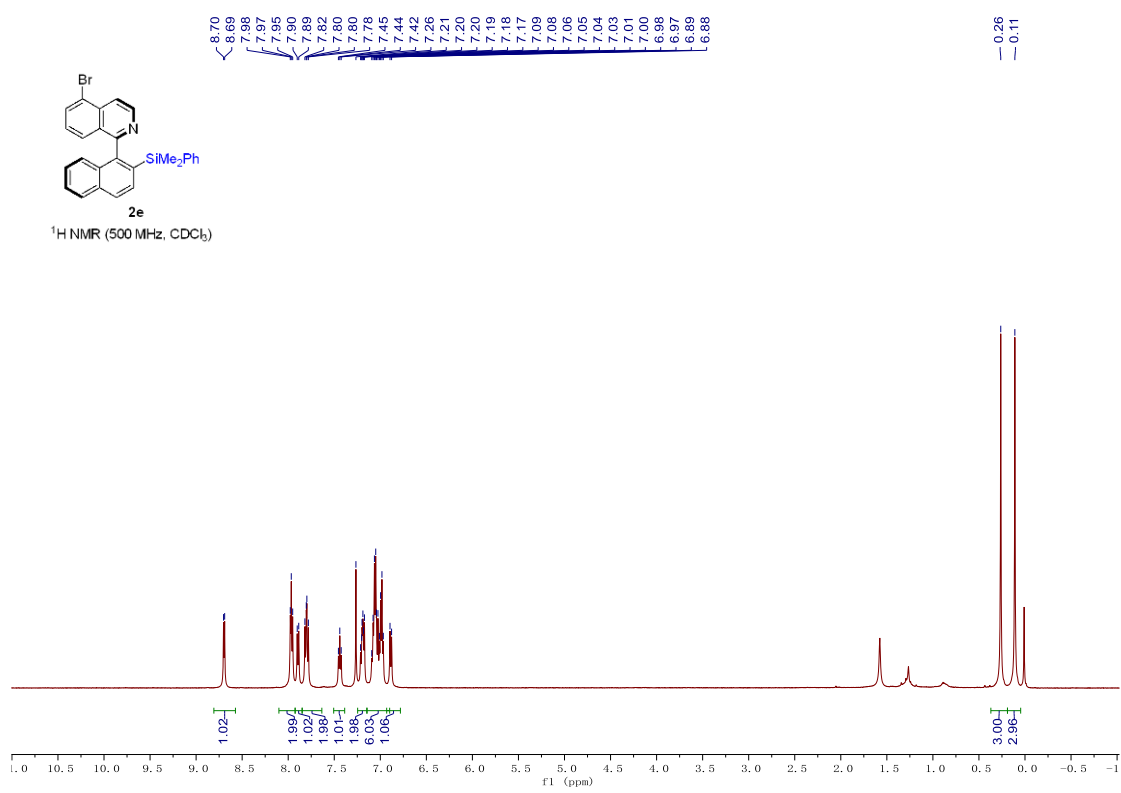

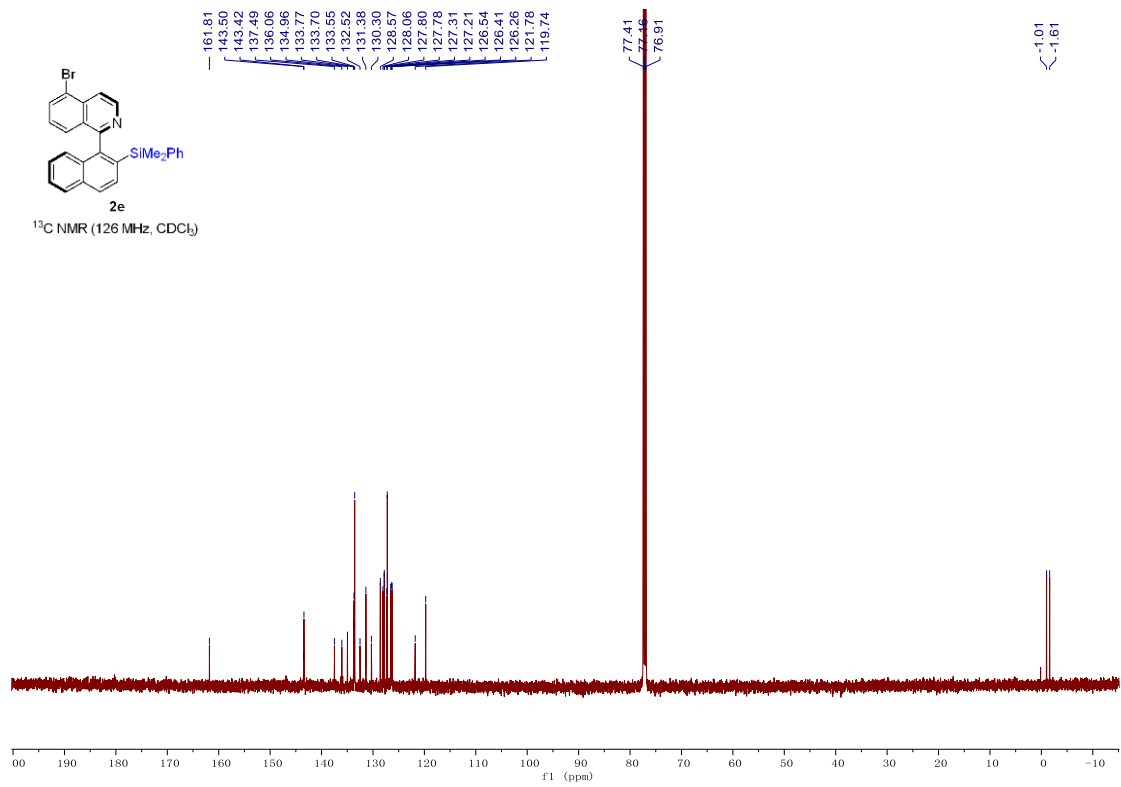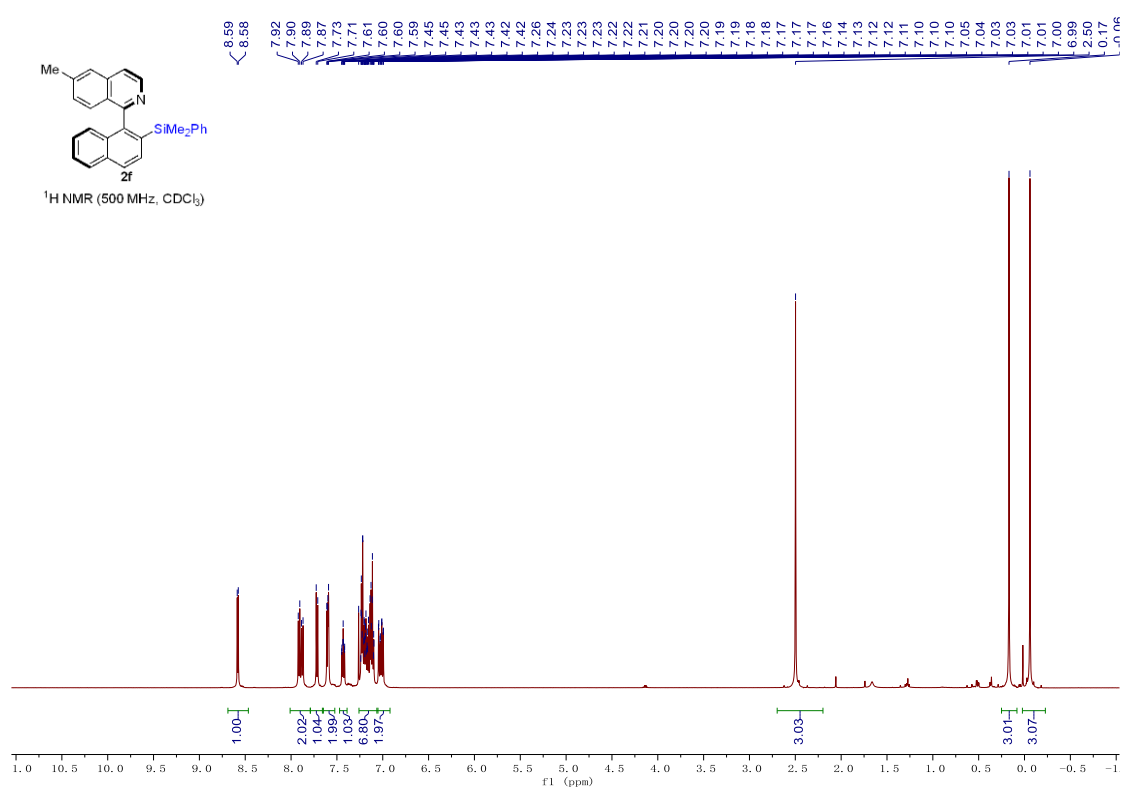

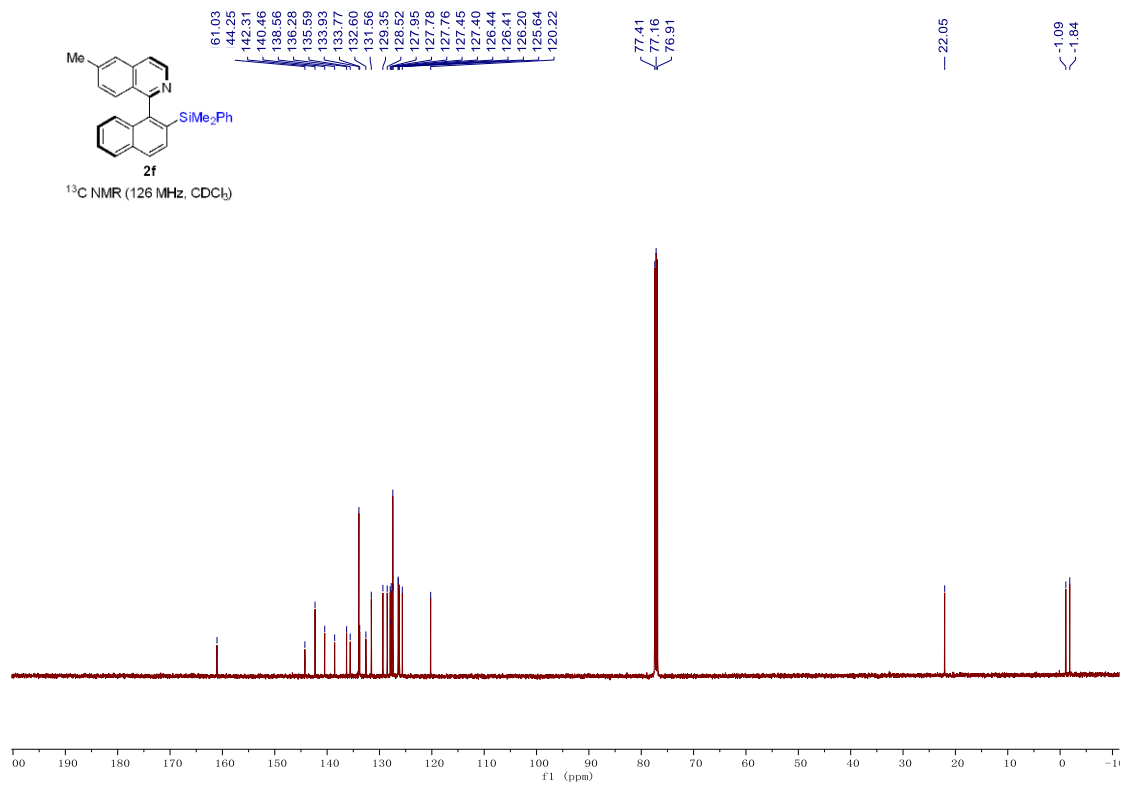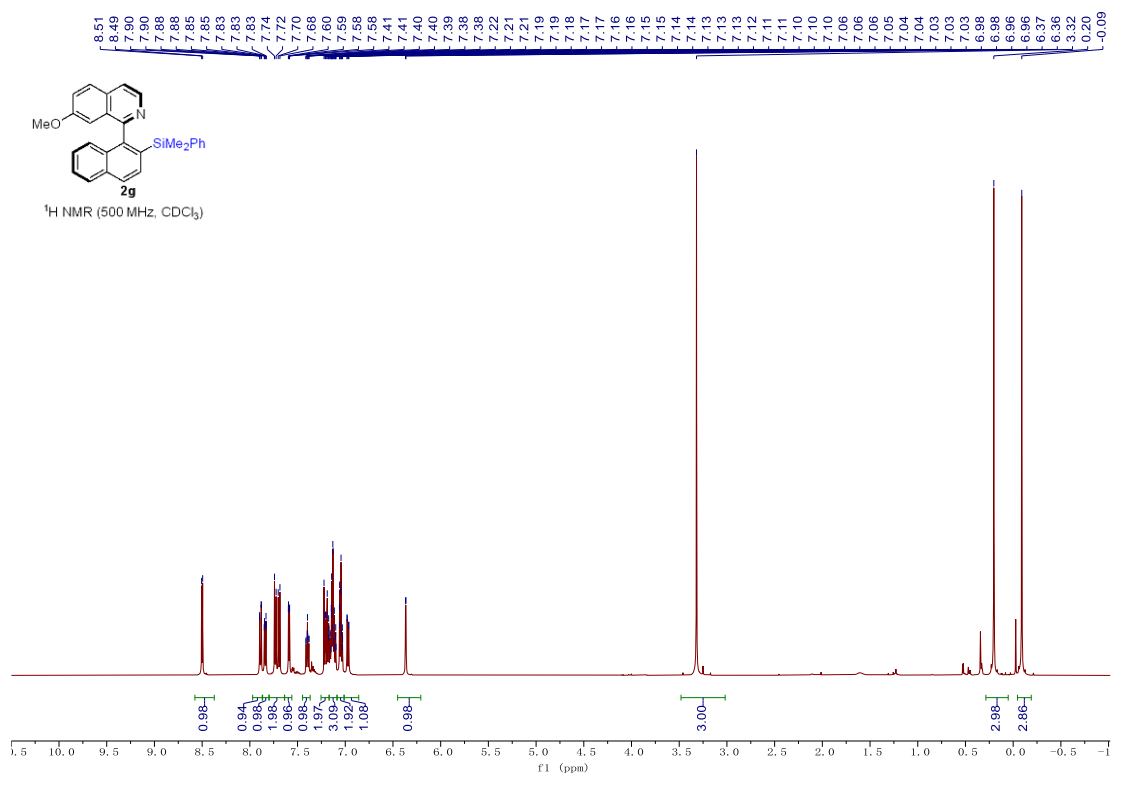

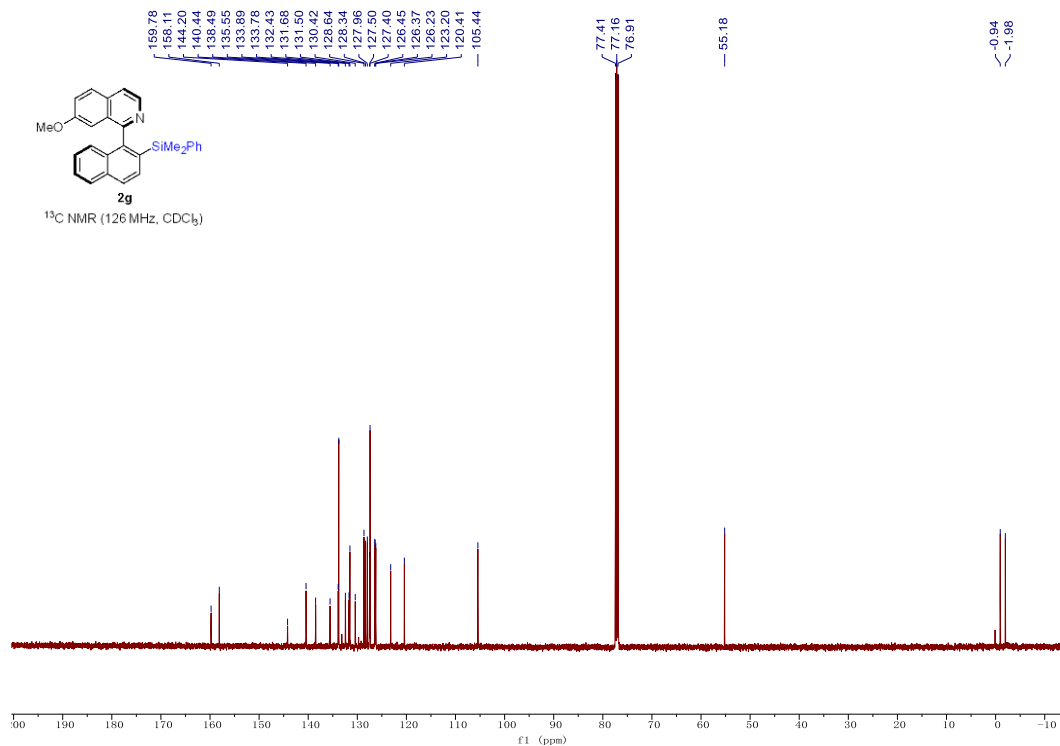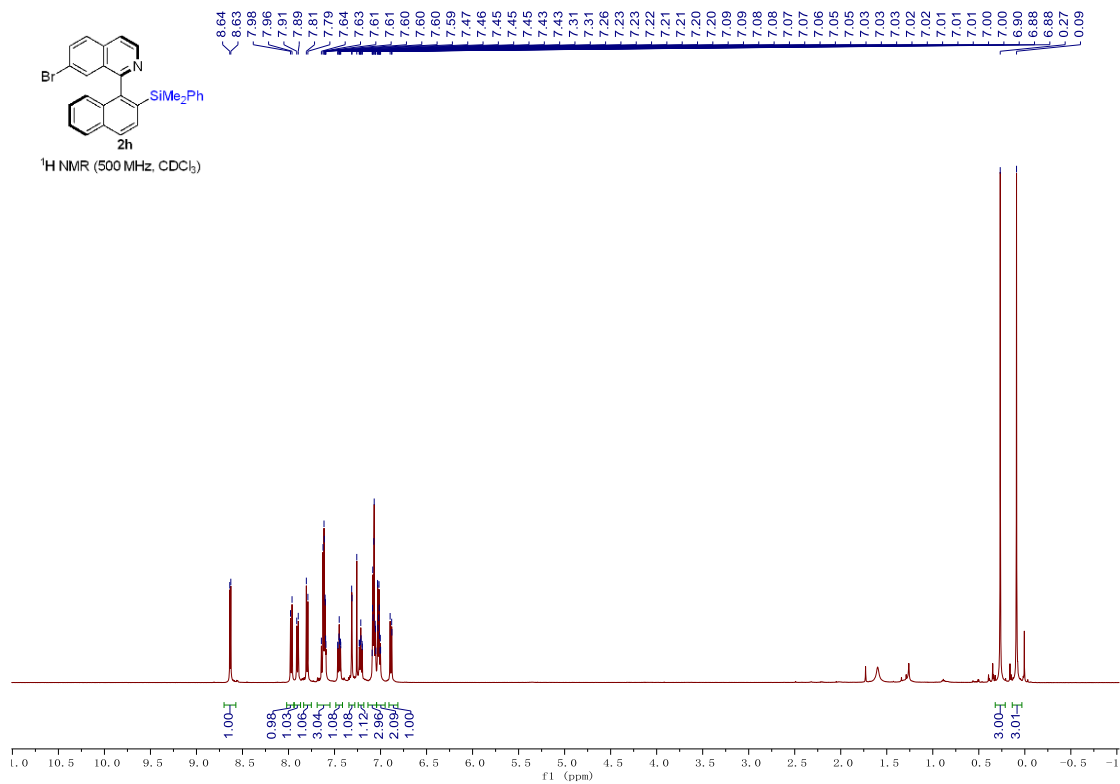

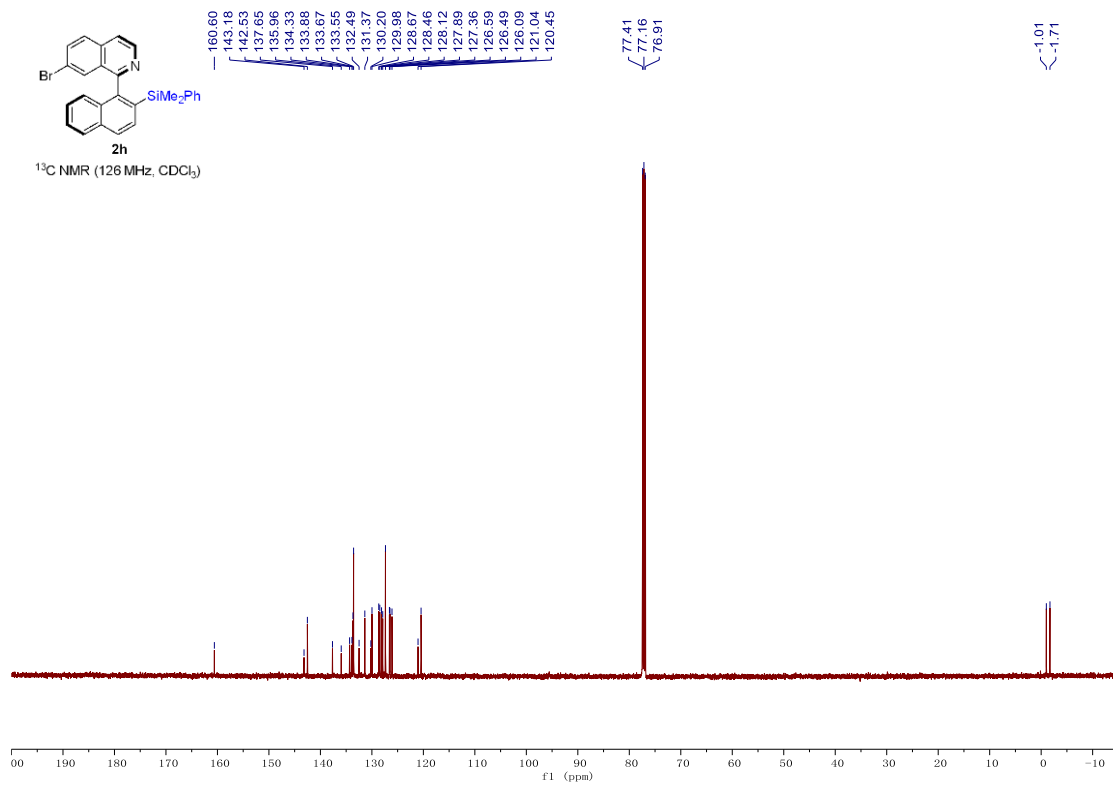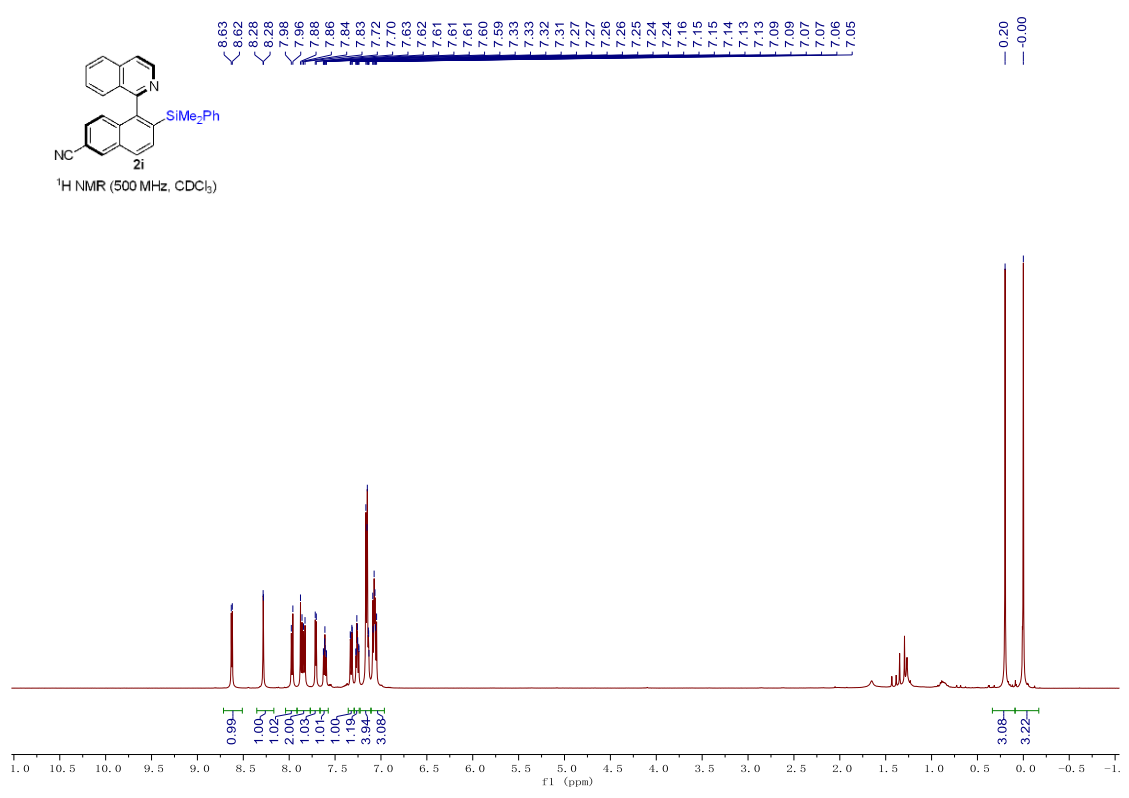

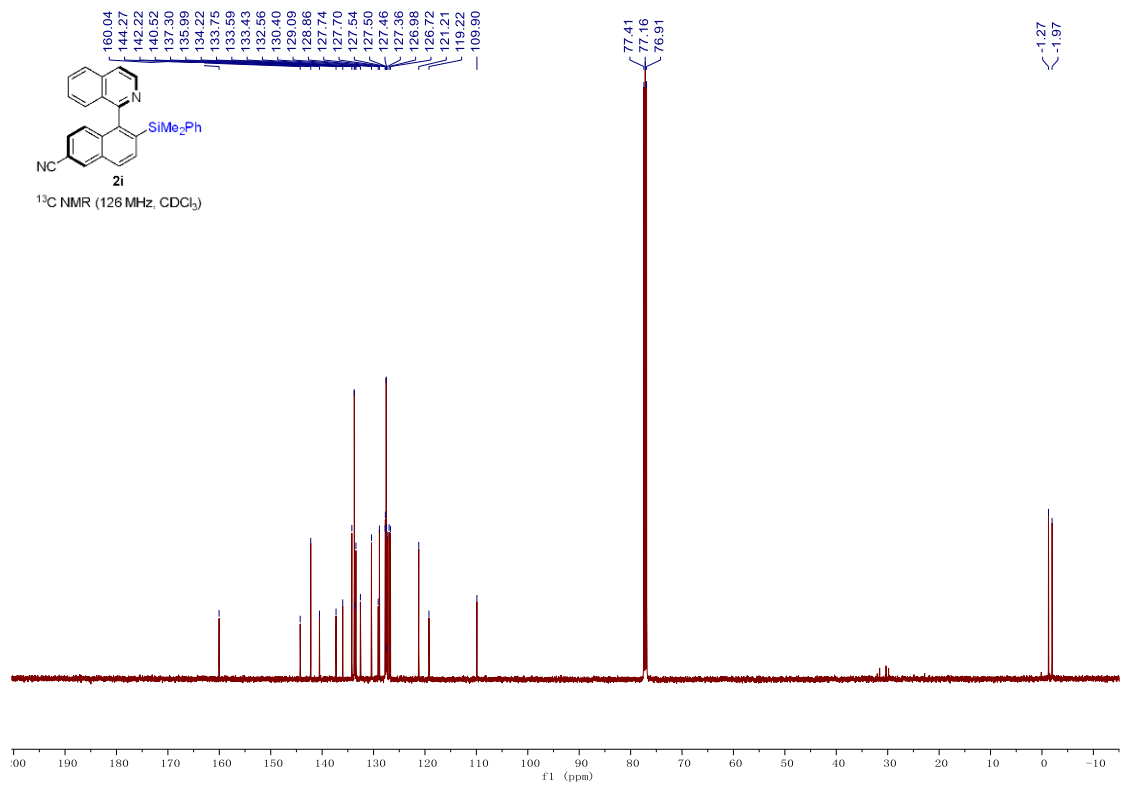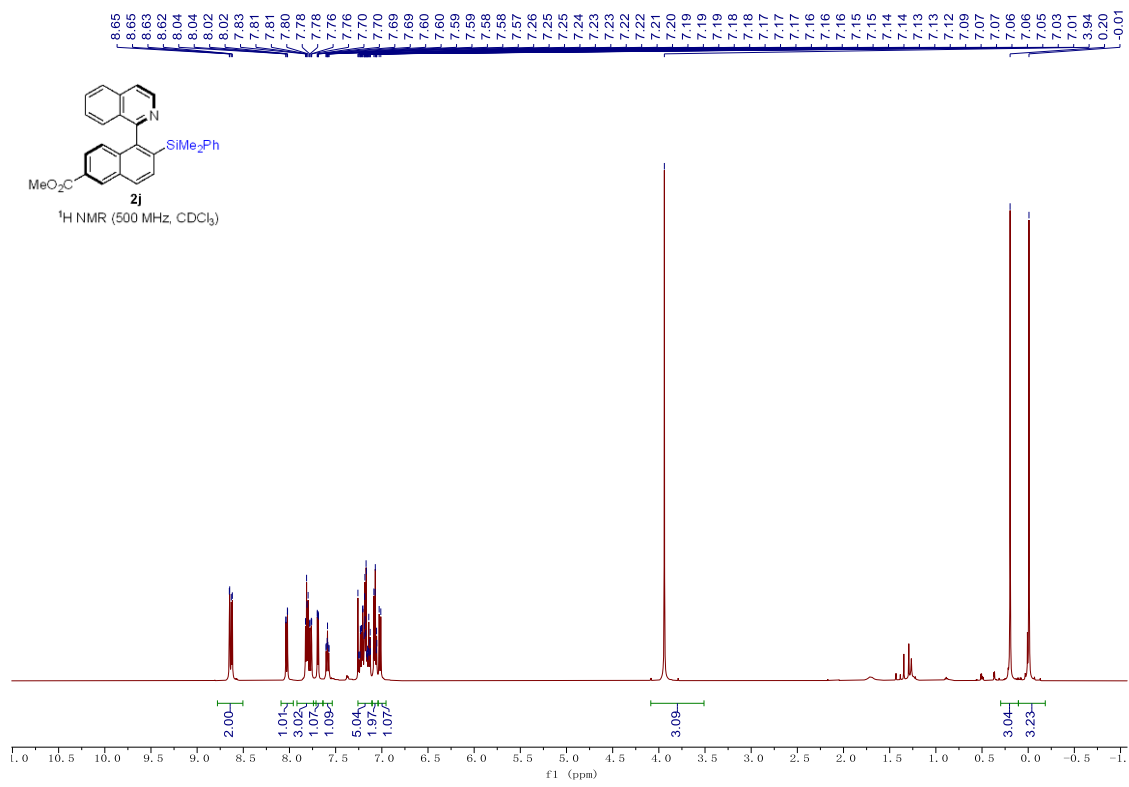

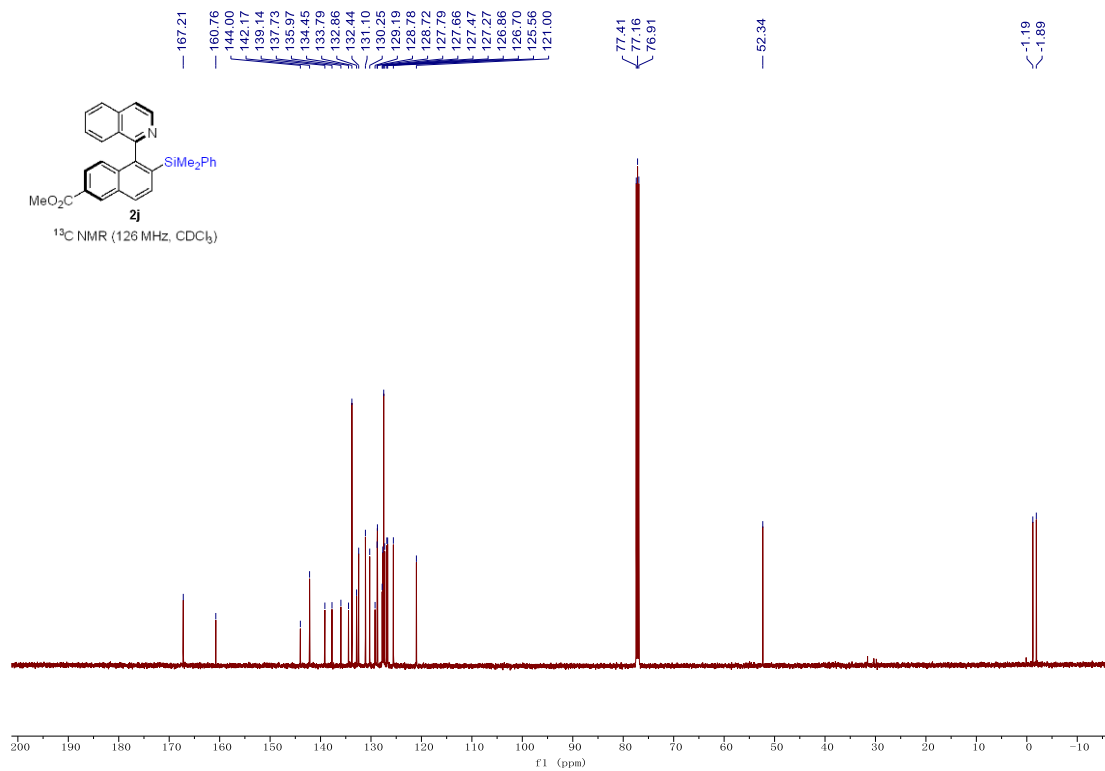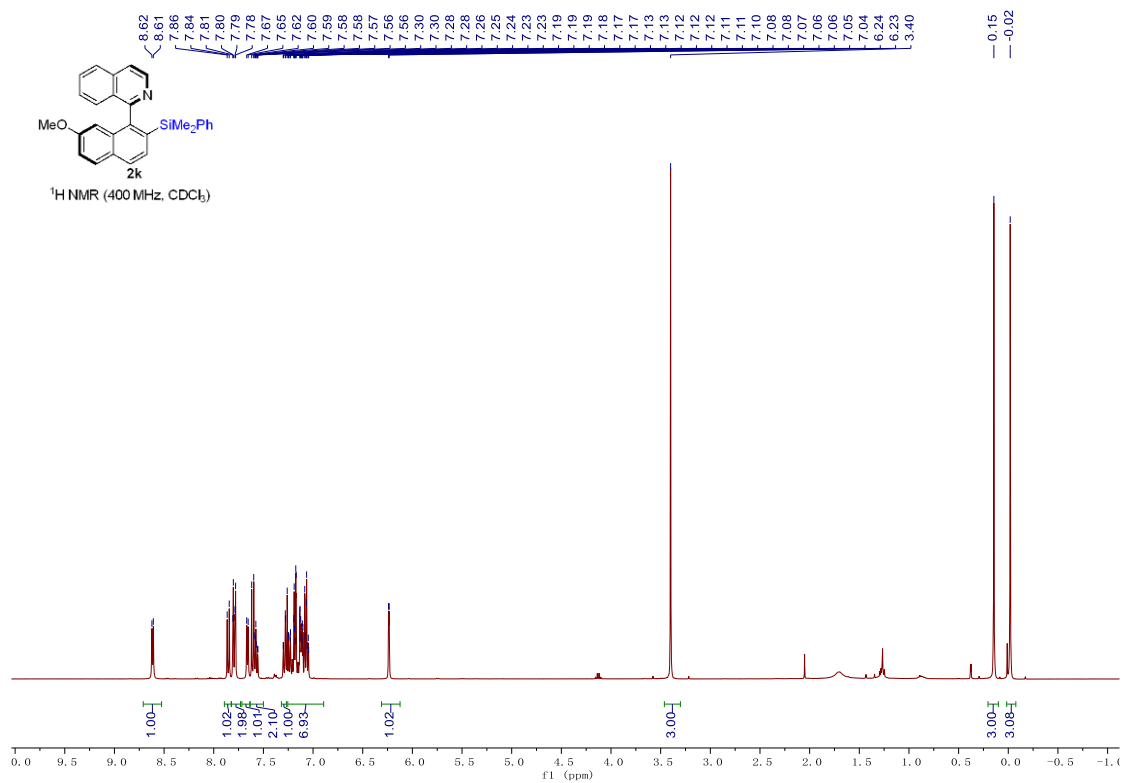

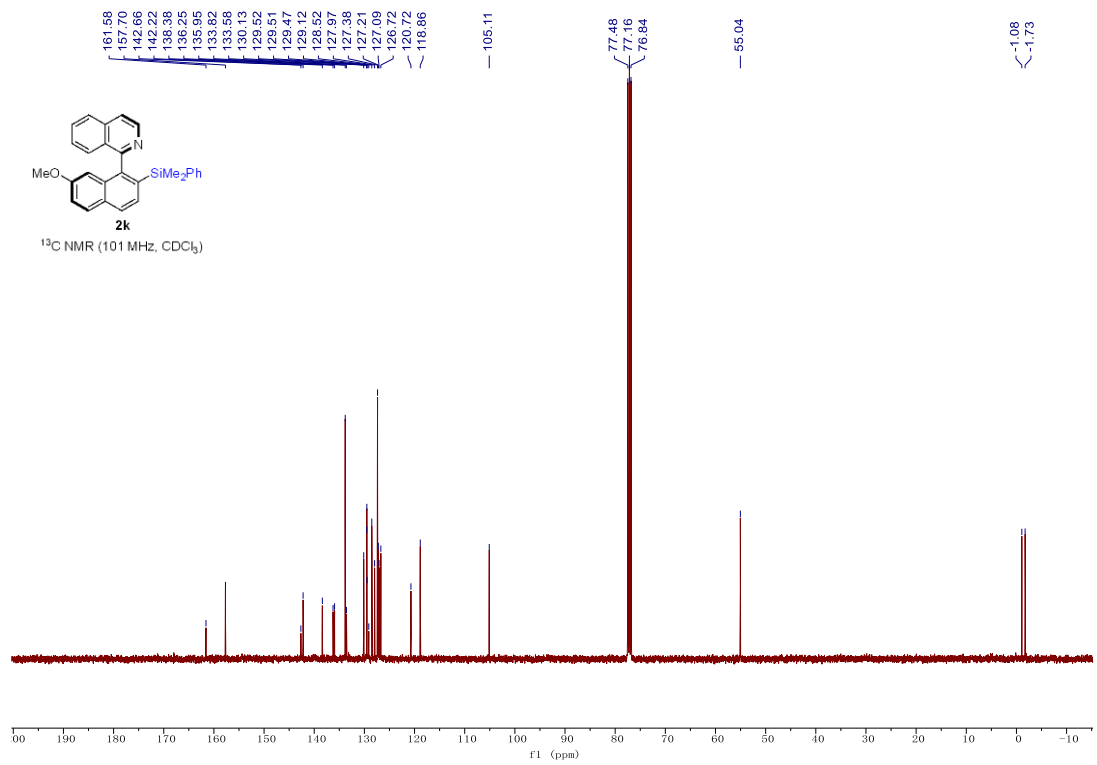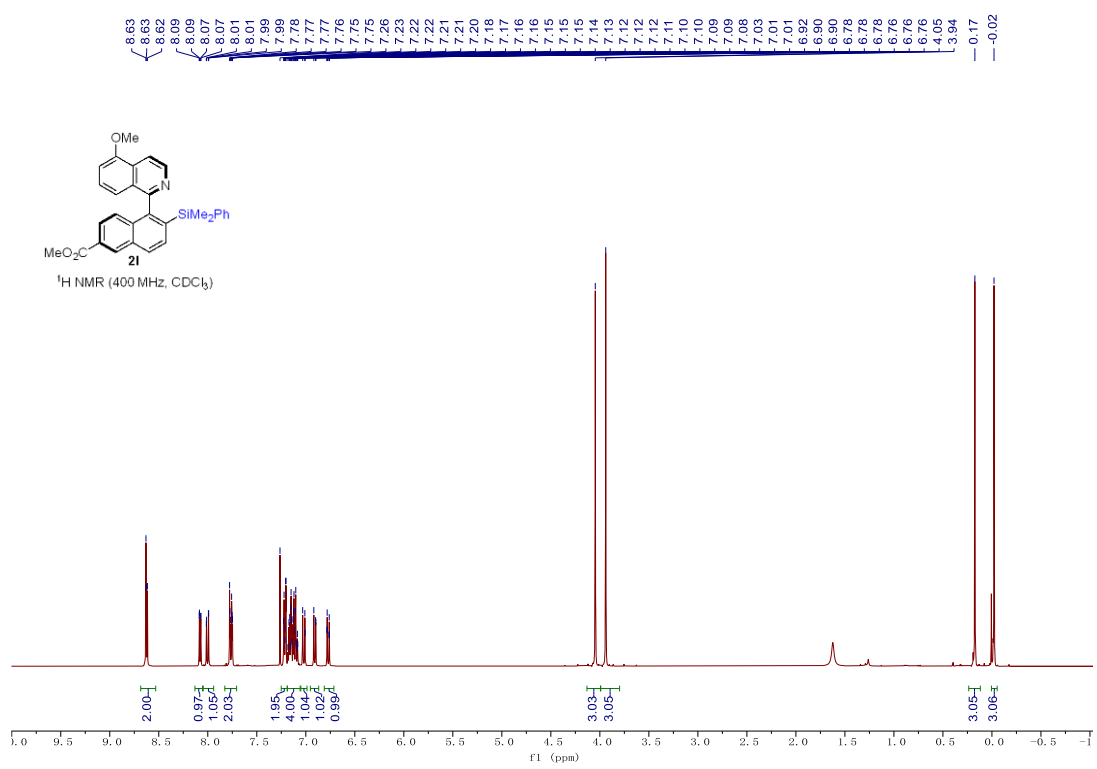

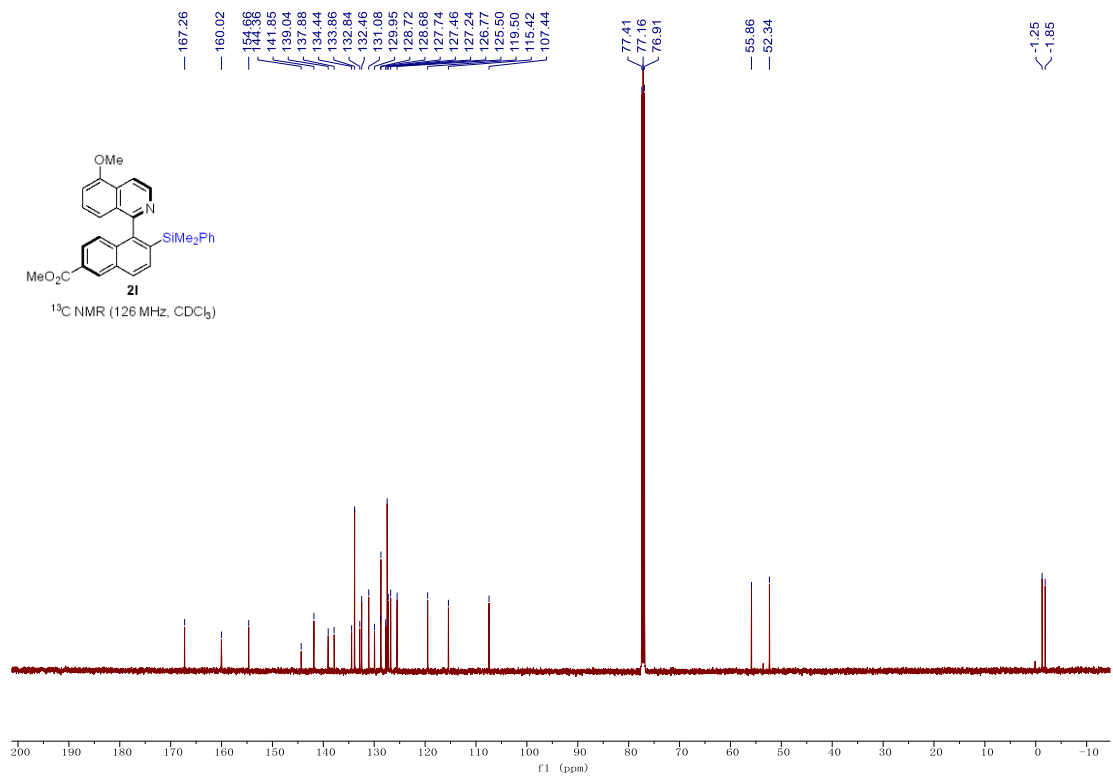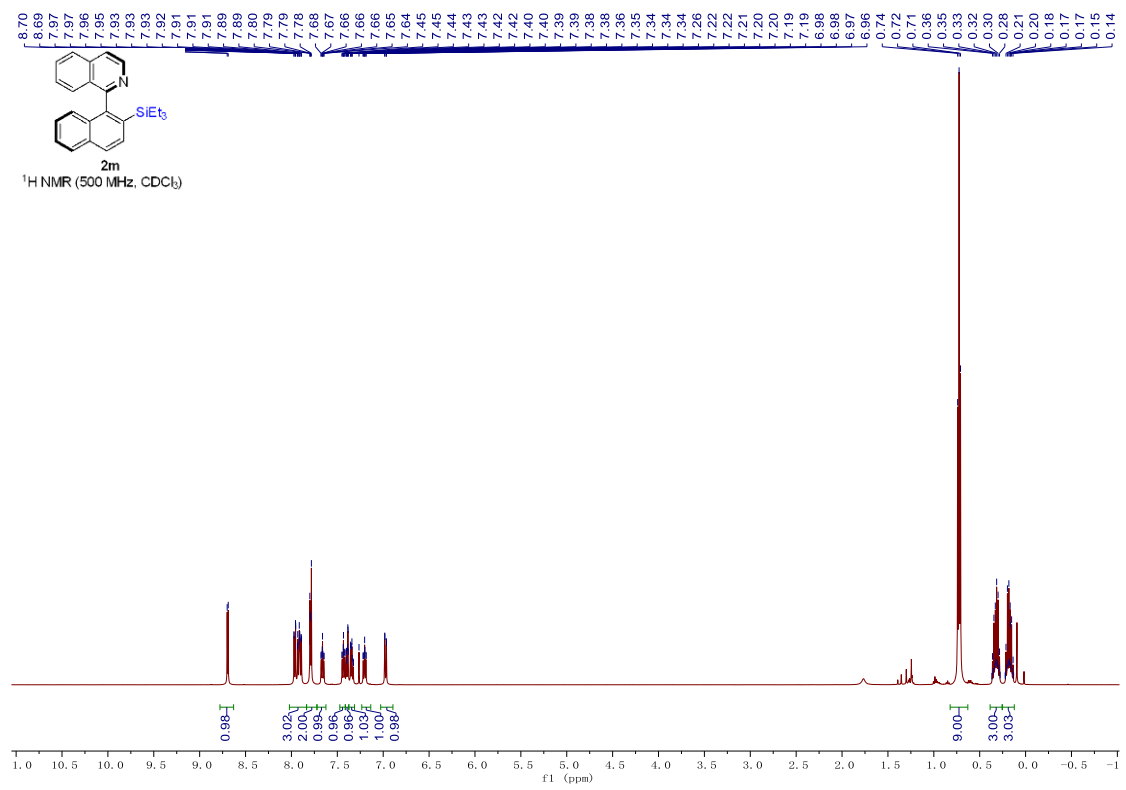

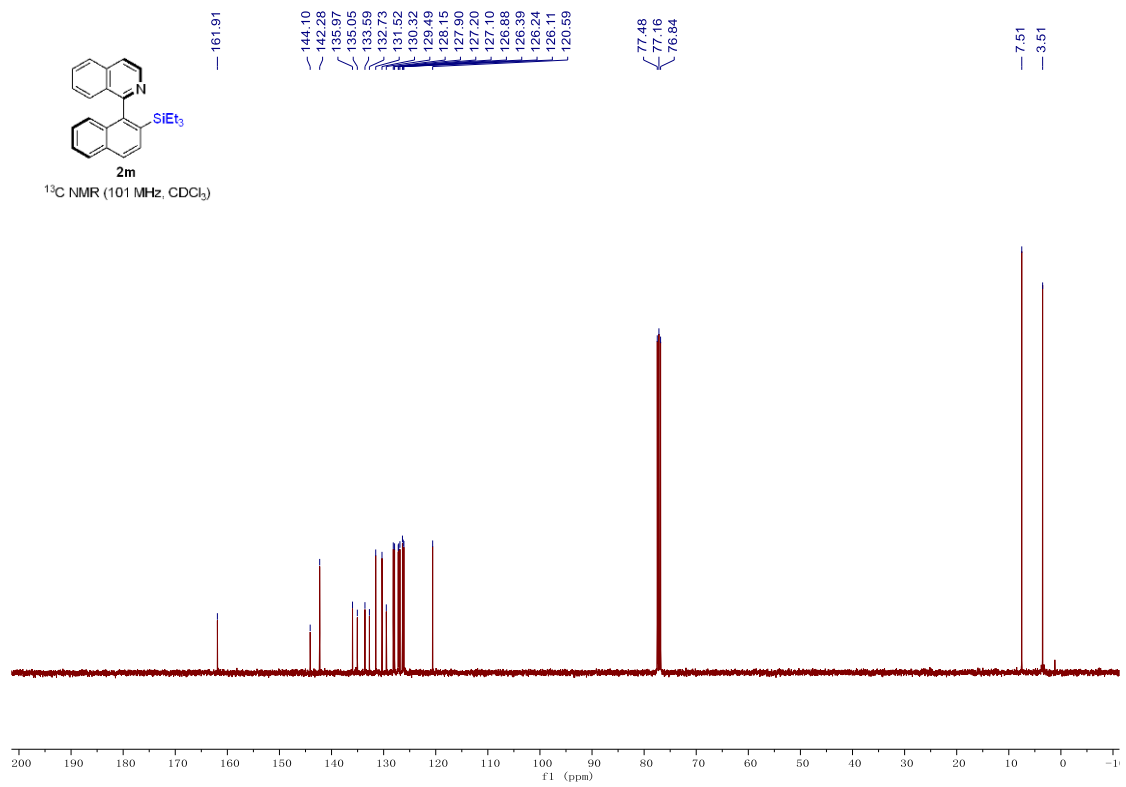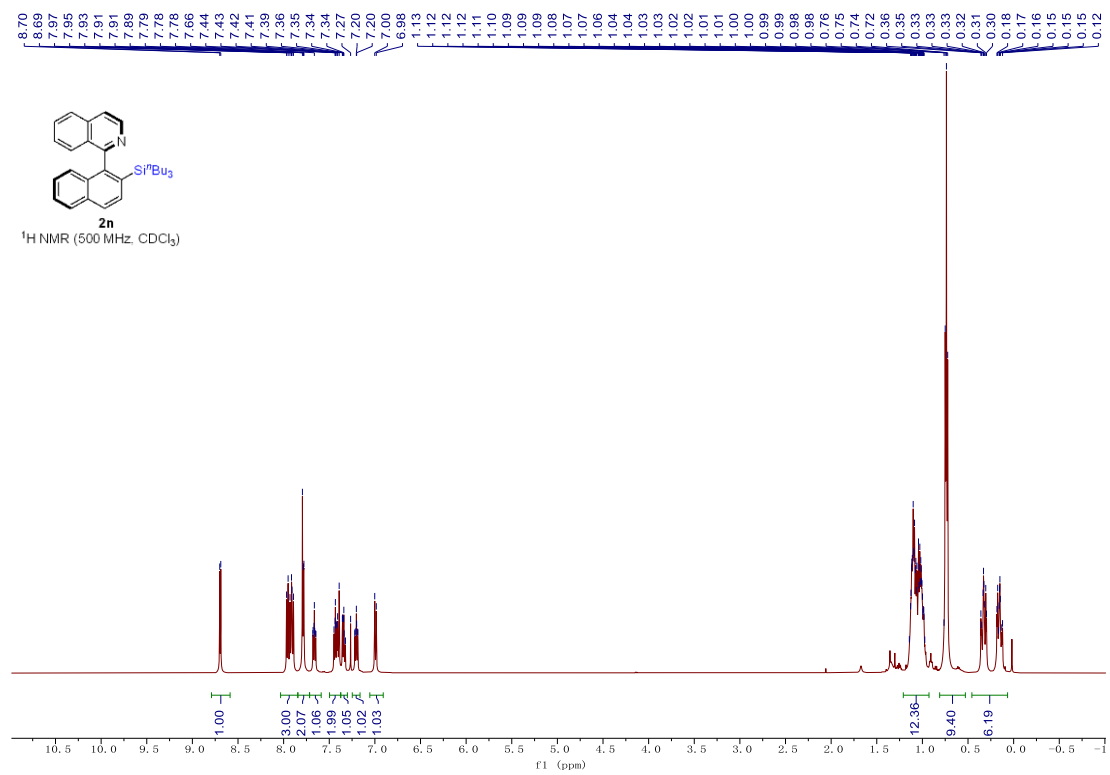

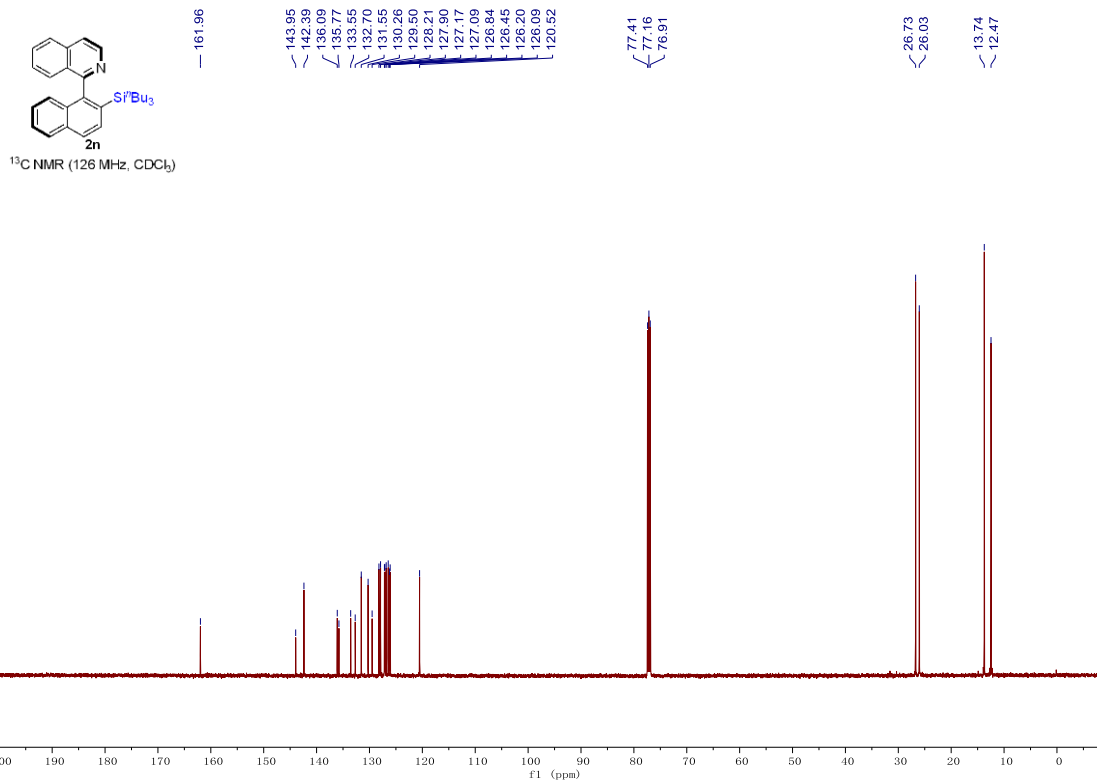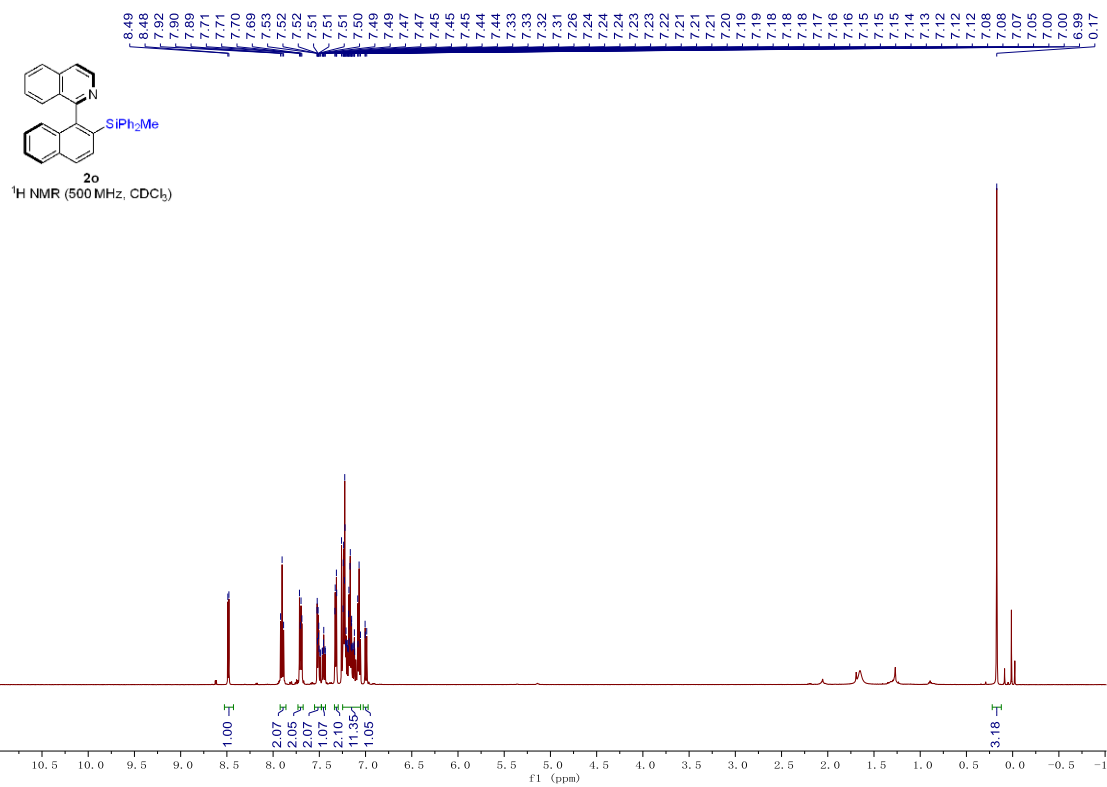

SL-14-60-SiPh2MeBpin-HC. 11. F1d

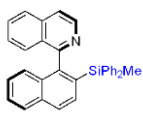

<sup>13</sup>C NMR (126 MHz, CDCl<sub>3</sub>)

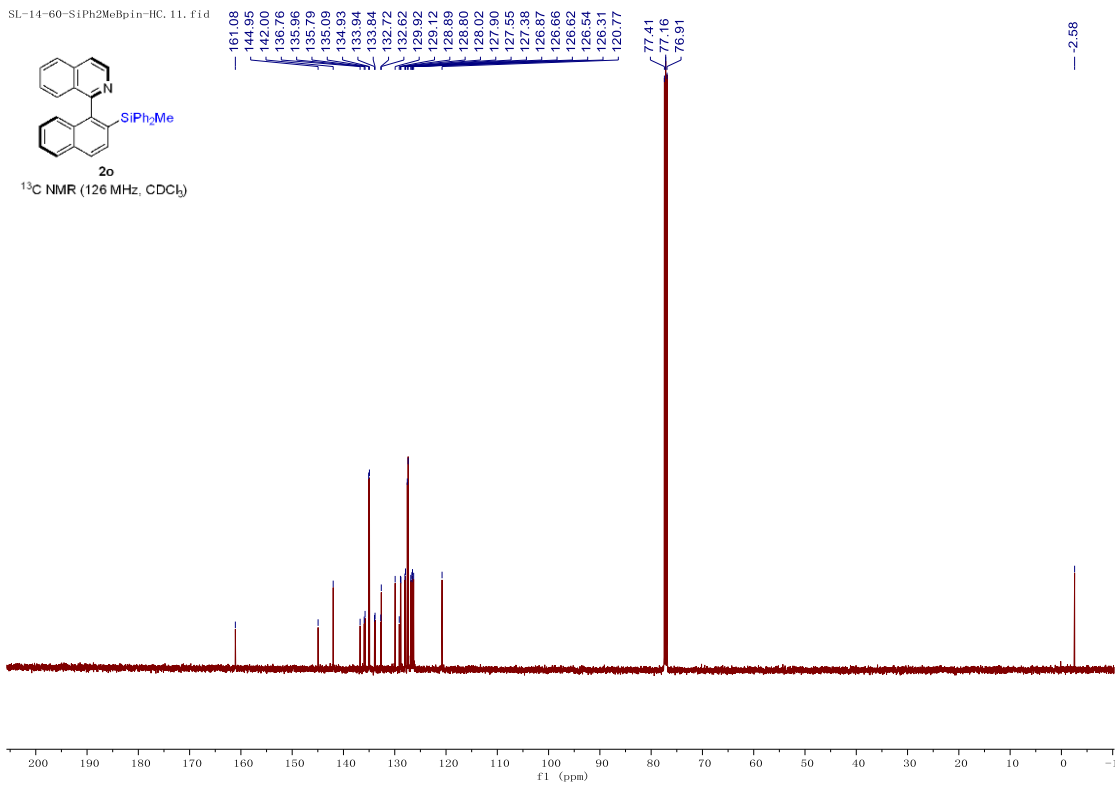

8.06  
8.04  
8.00  
7.98  
7.91  
7.89  
7.83  
7.81  
7.67  
7.65  
7.63  
7.47  
7.43  
7.41  
7.39  
7.26  
7.23  
7.21  
7.19  
7.05  
7.03  
7.00  
6.98  
6.96  
6.88  
6.86  
6.84

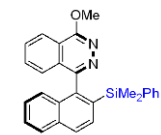

<sup>1</sup>H NMR (400 MHz, CDCl<sub>3</sub>)

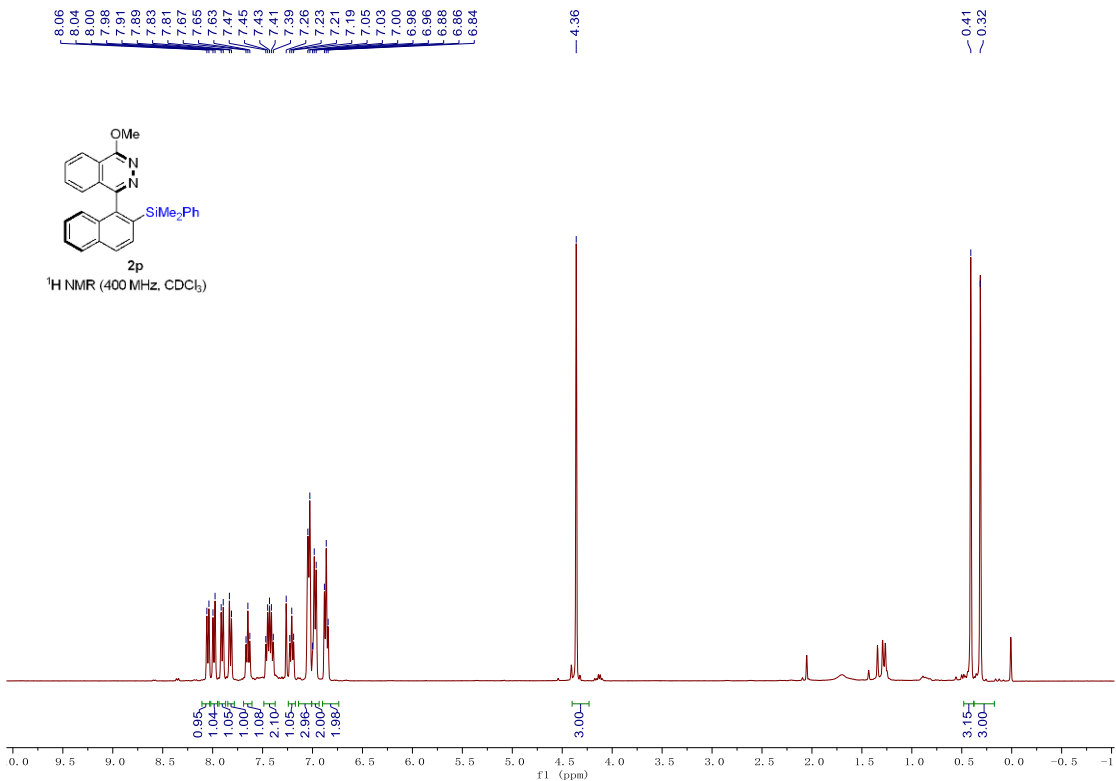

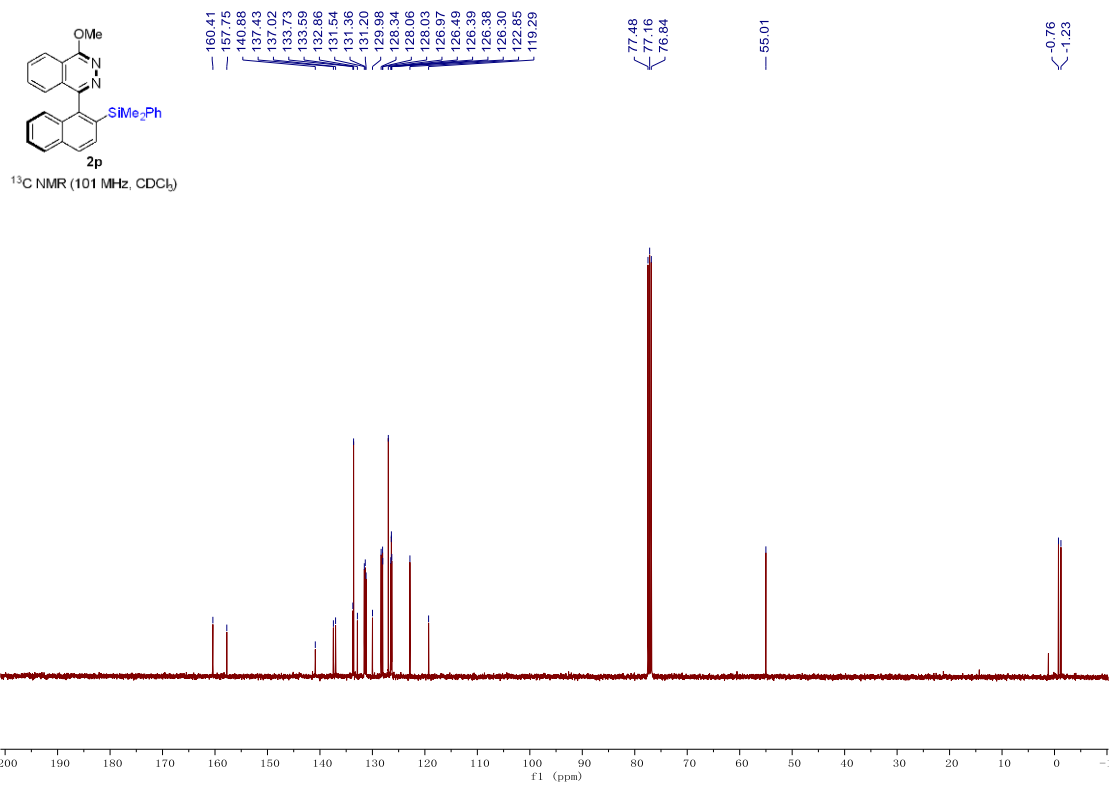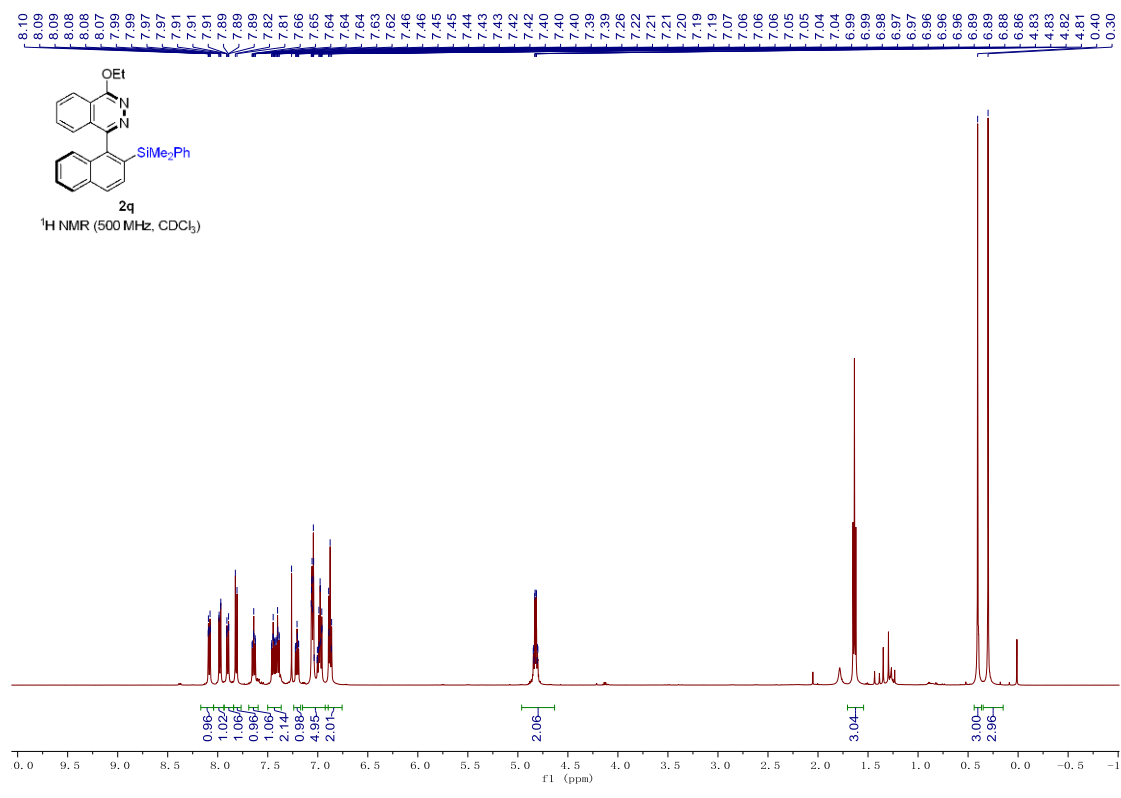

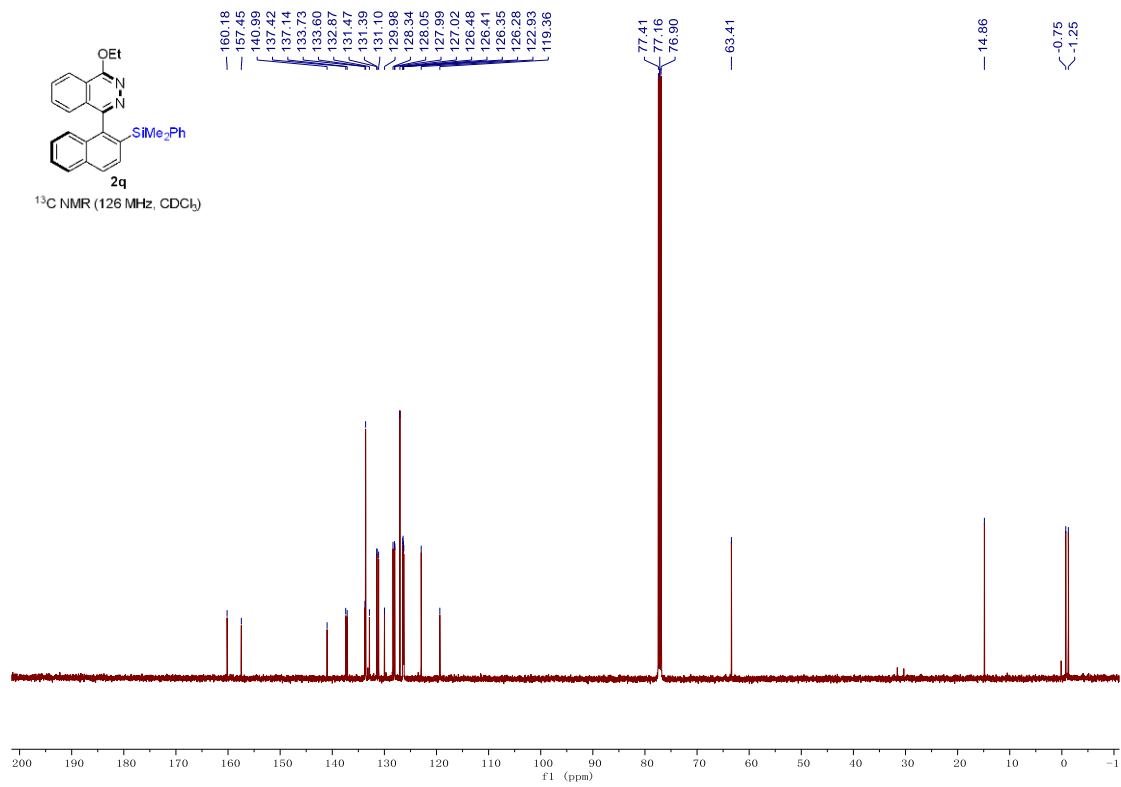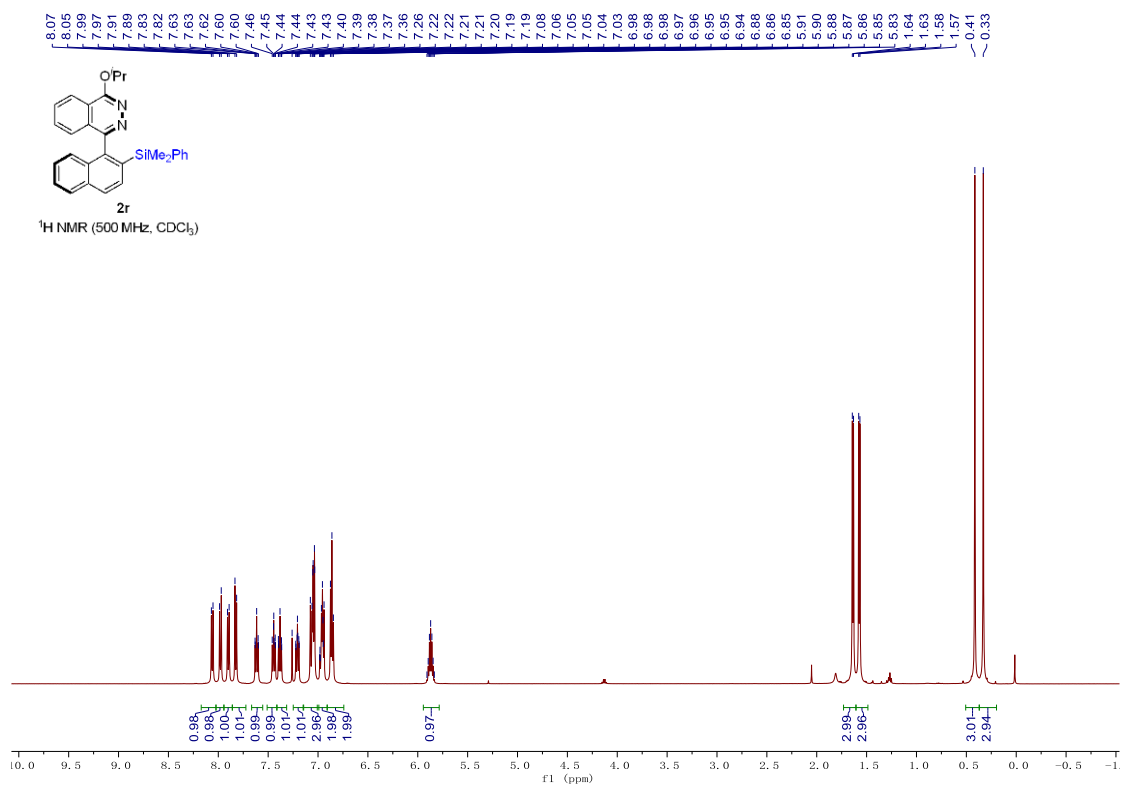

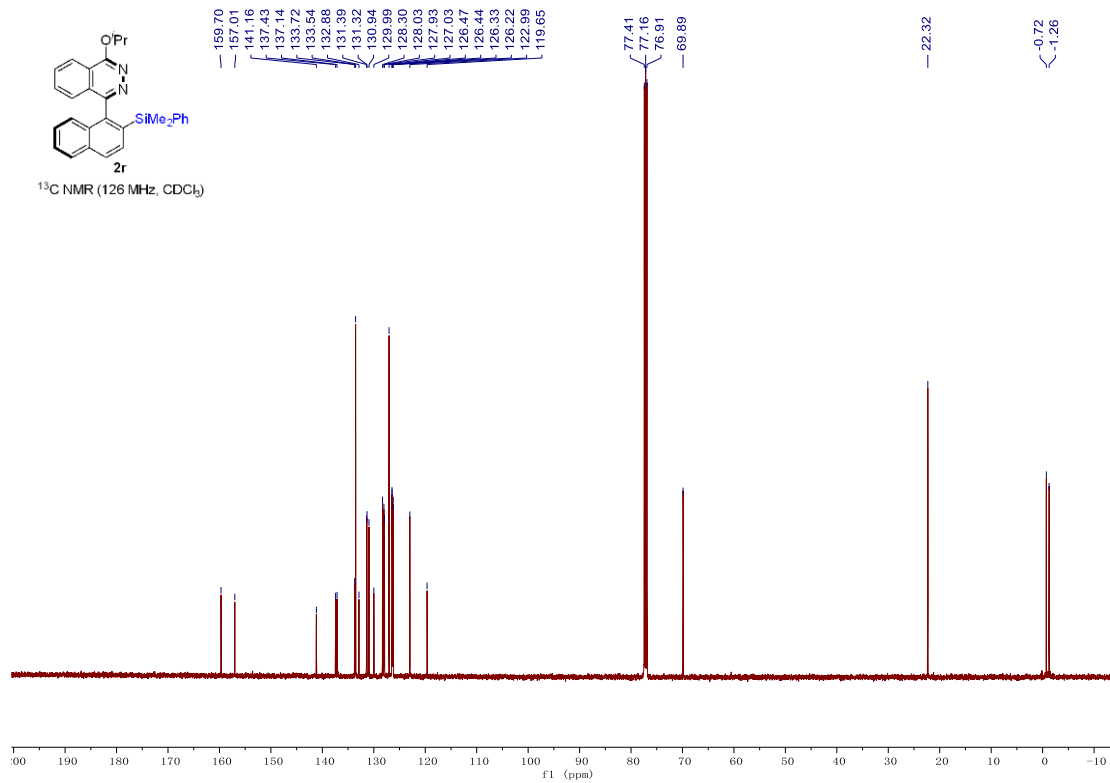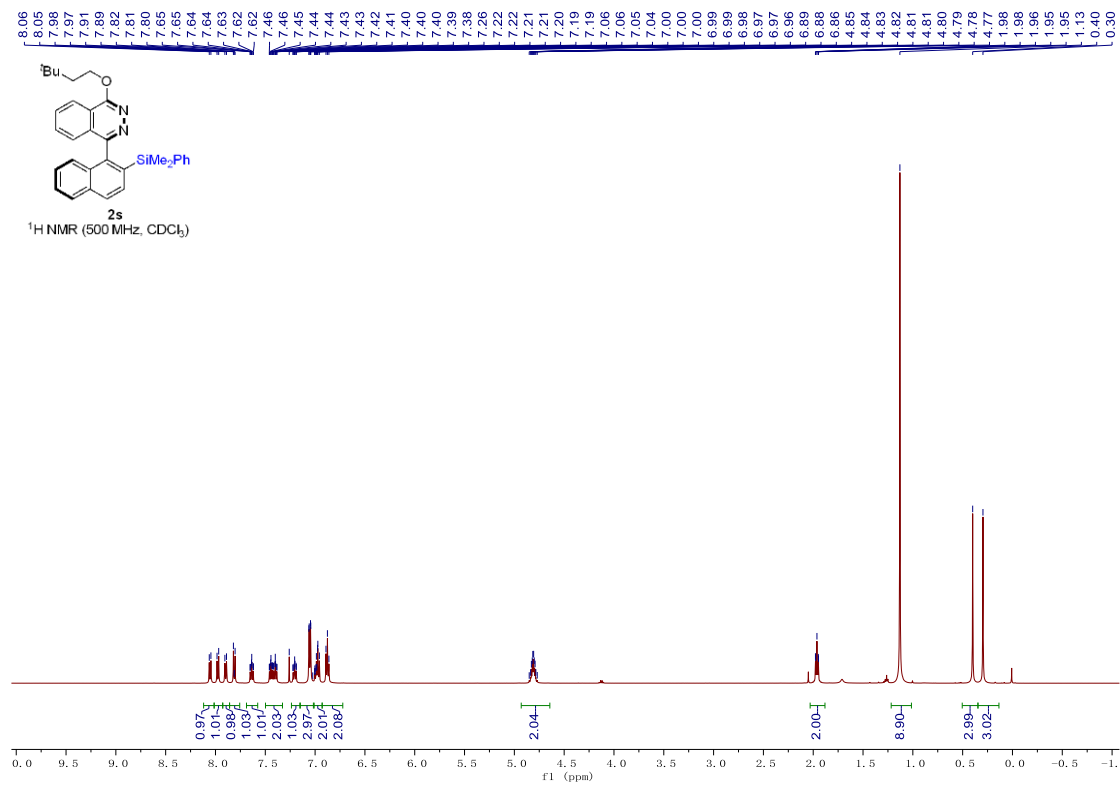

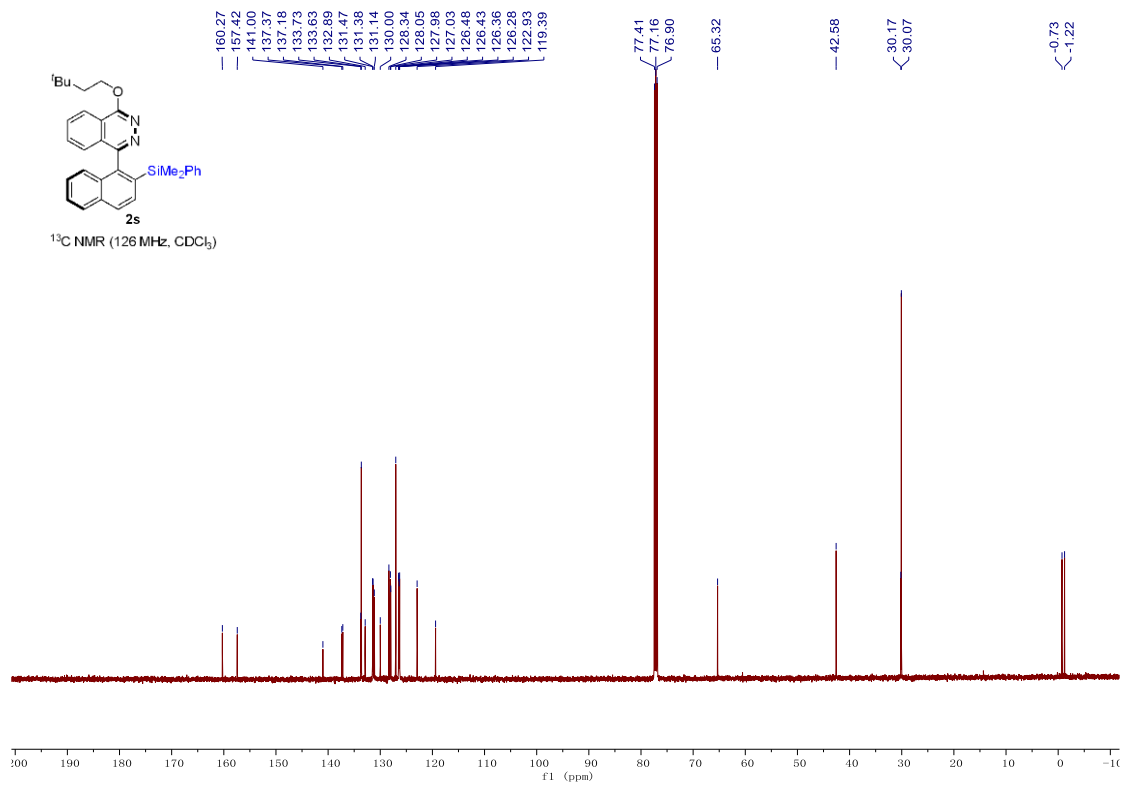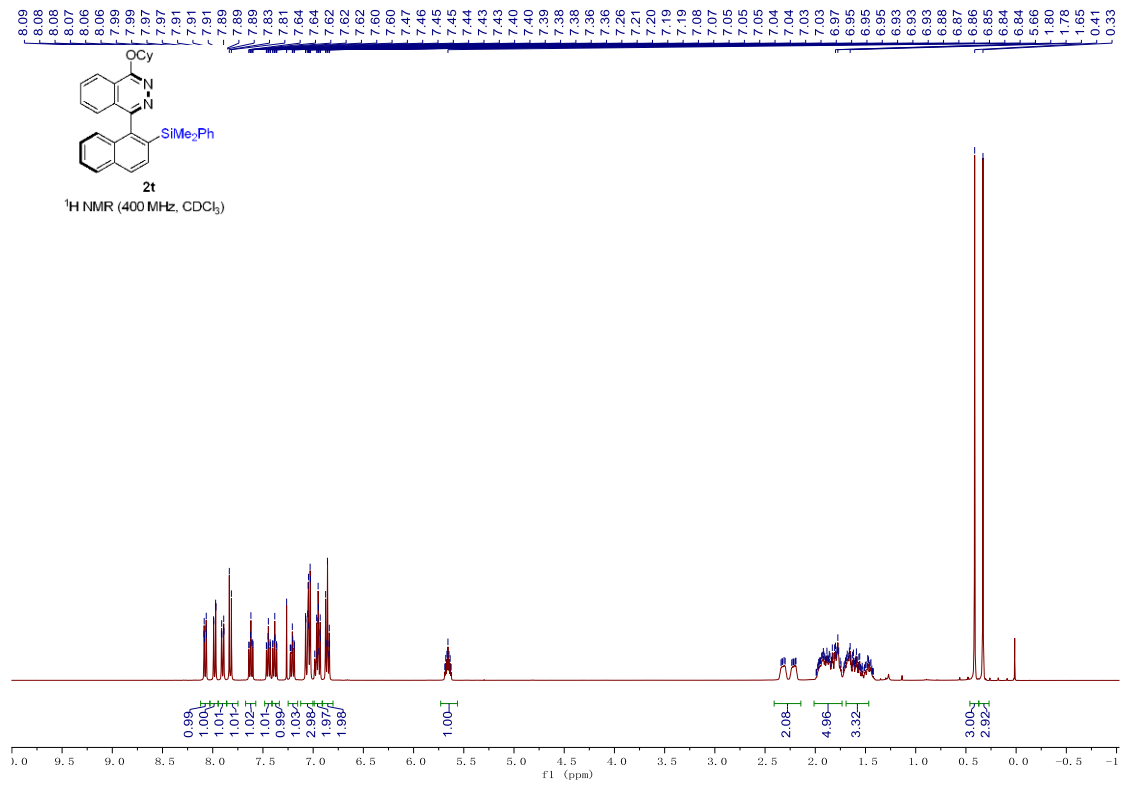

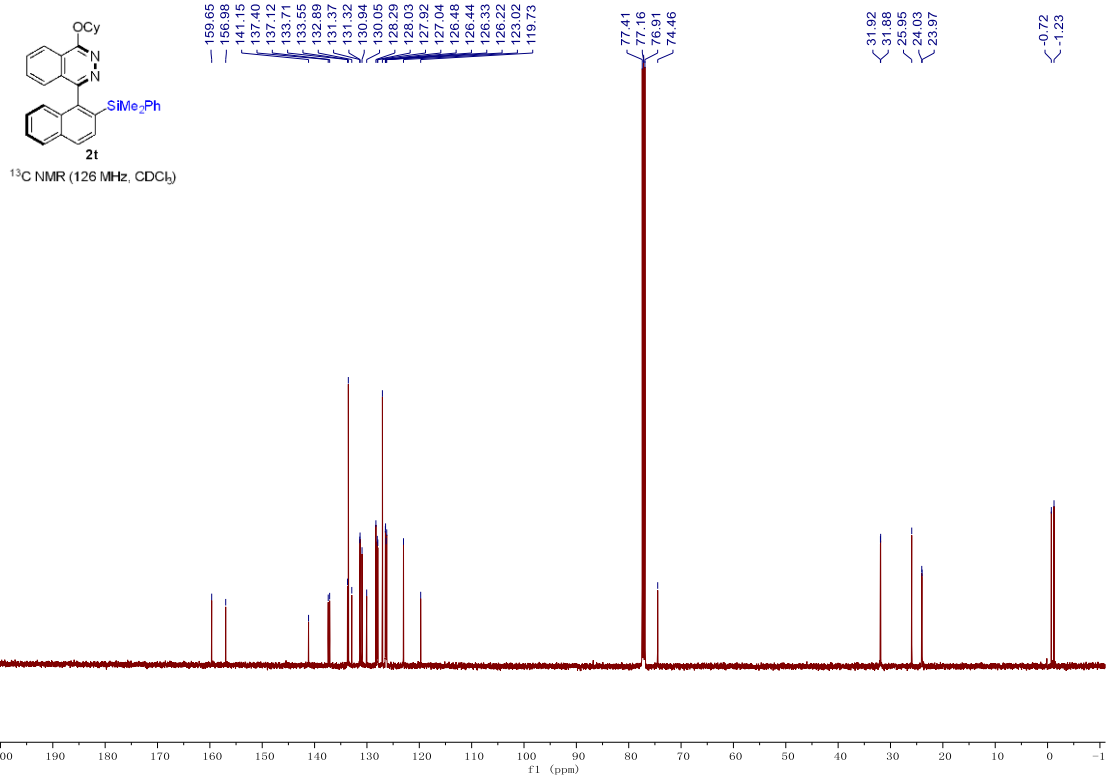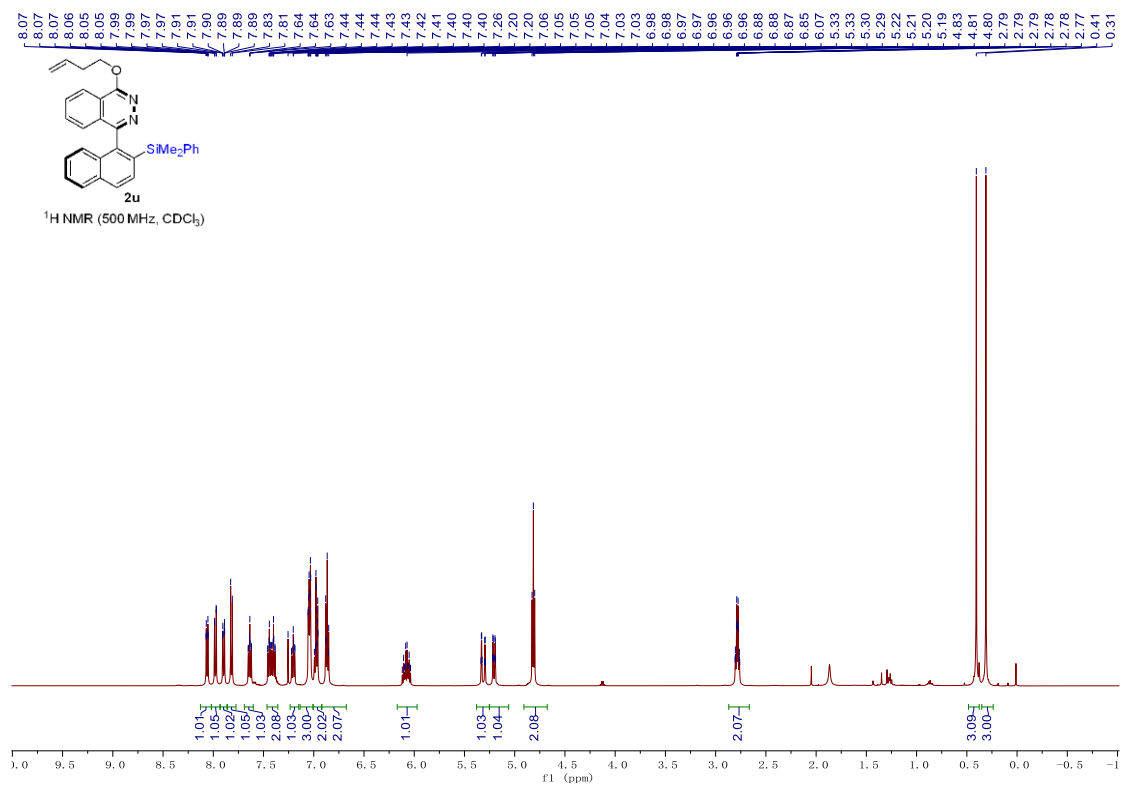

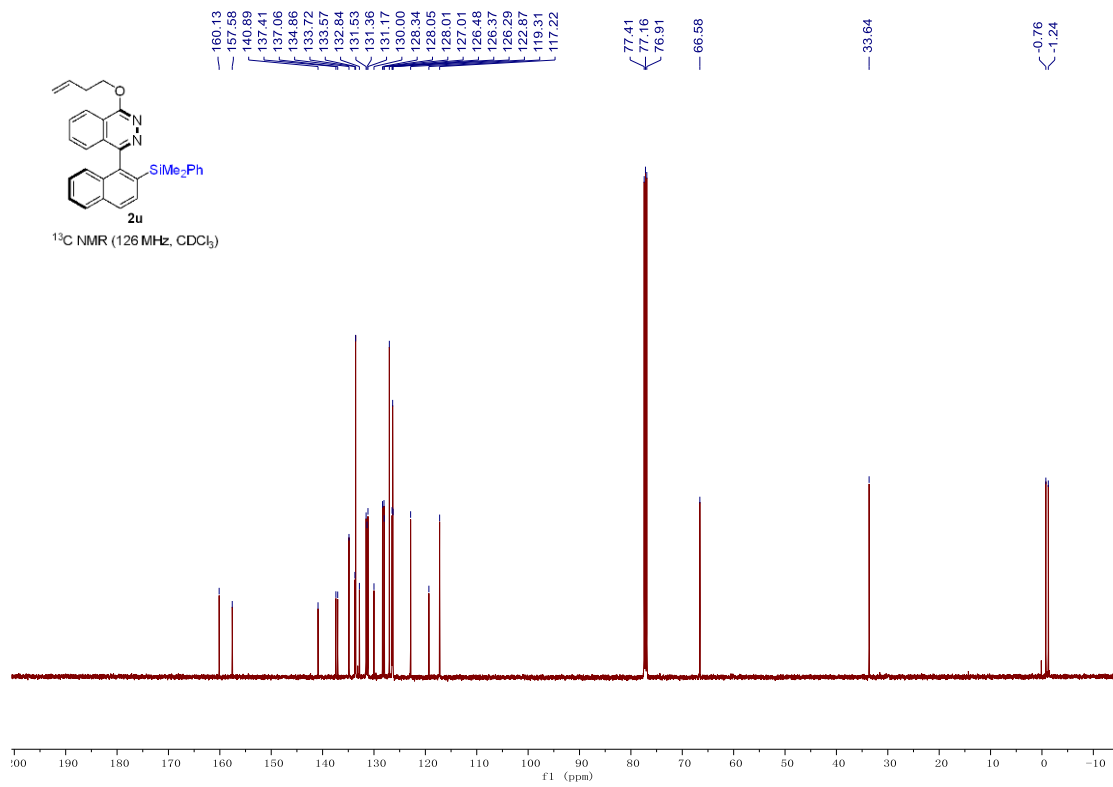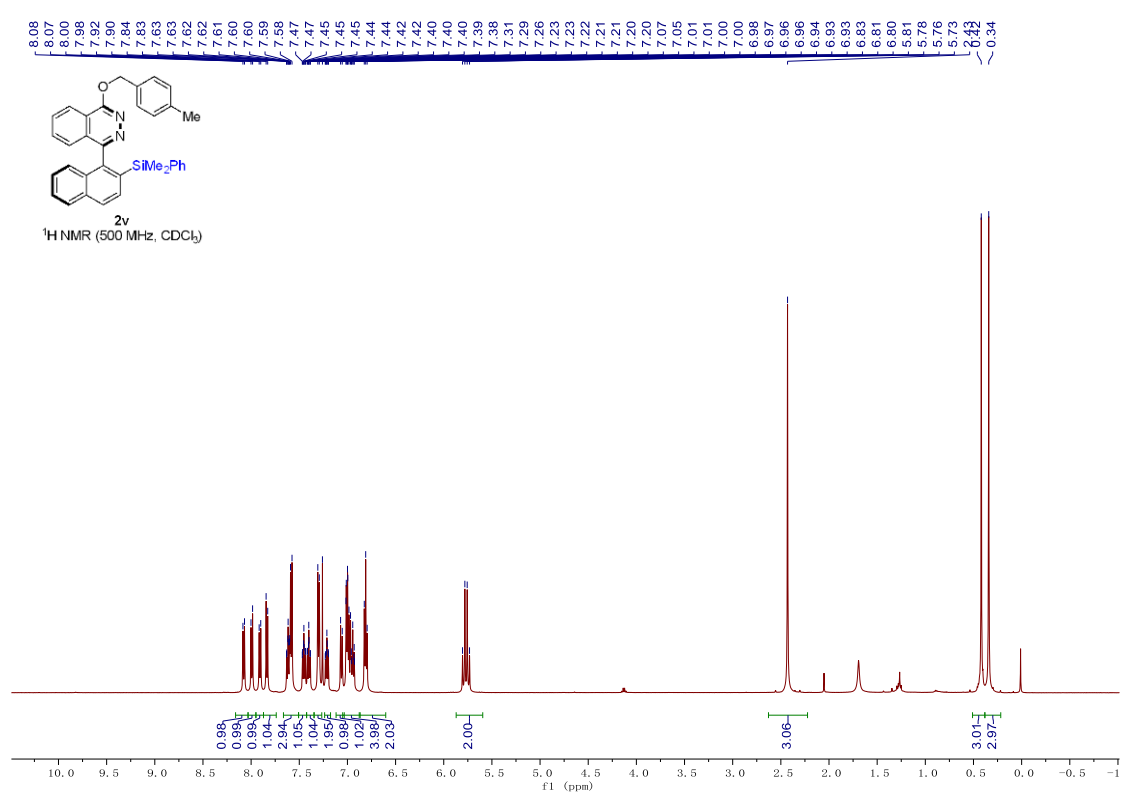

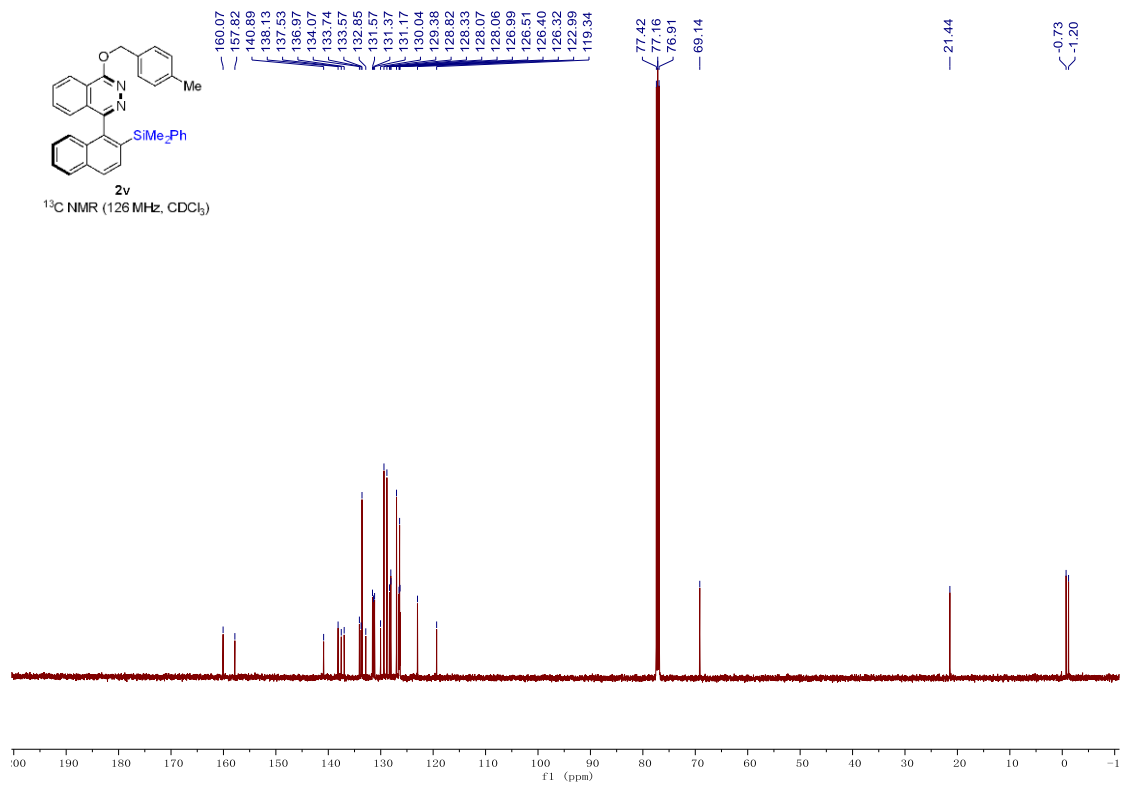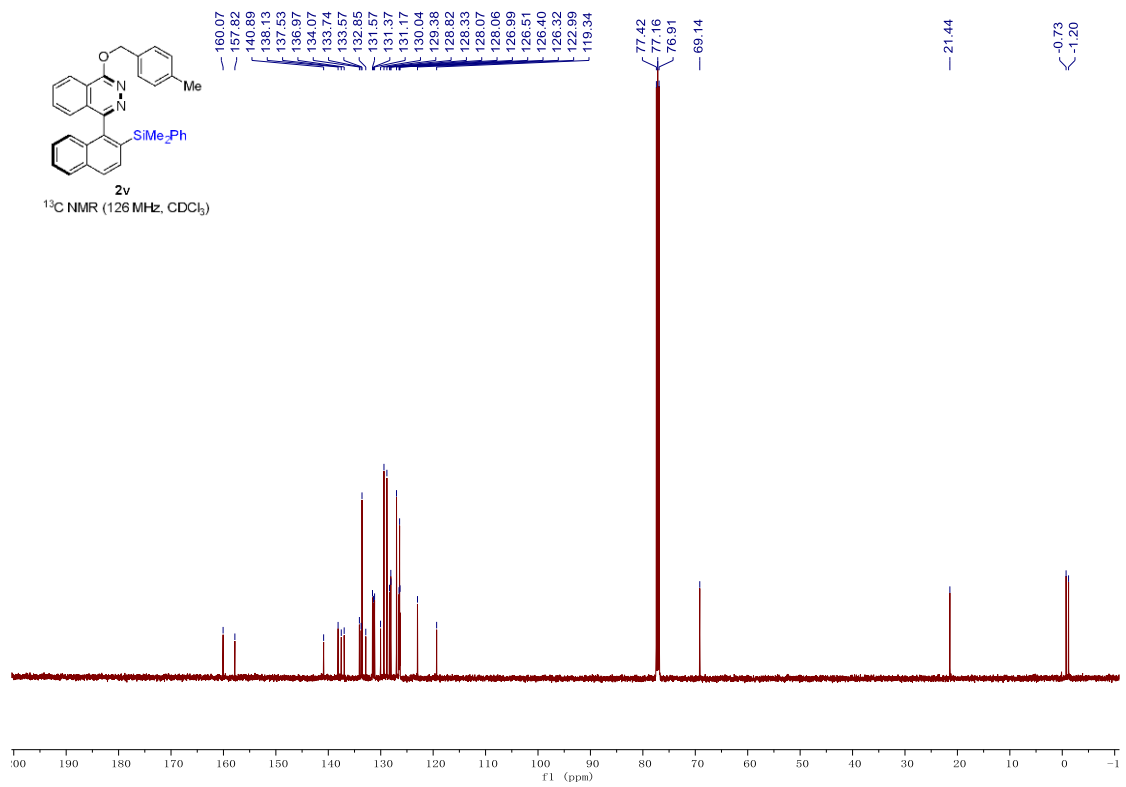

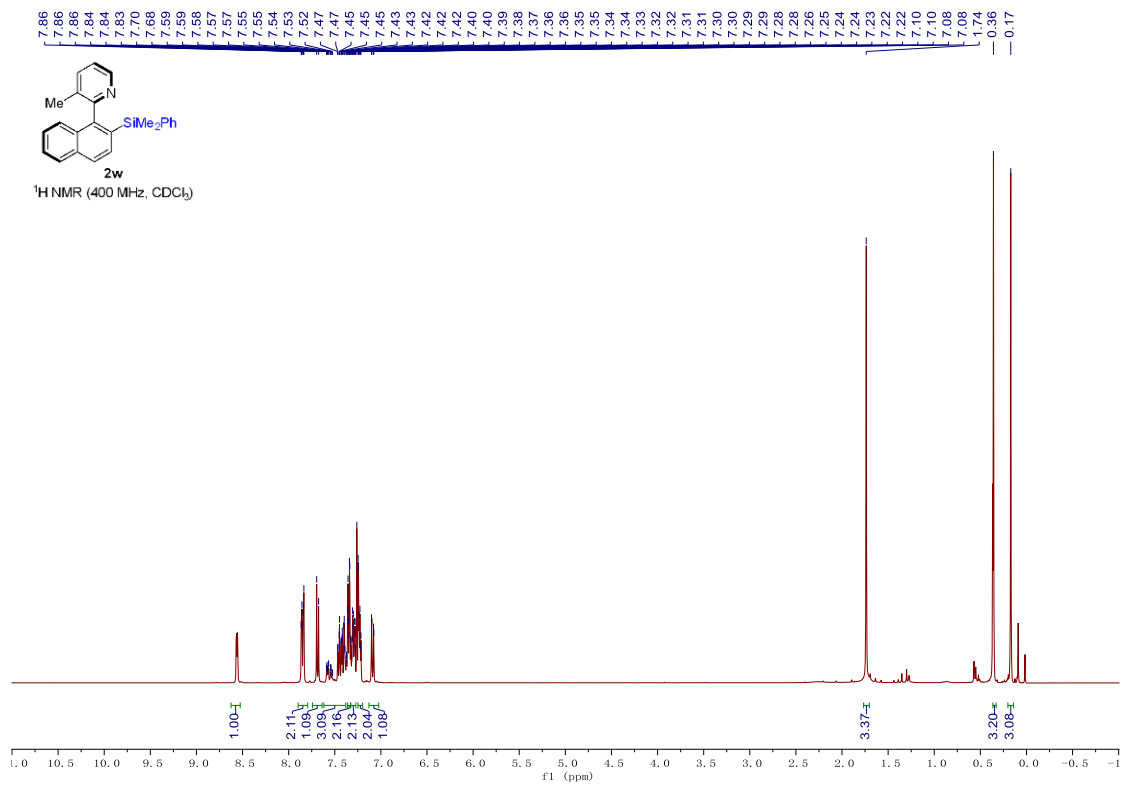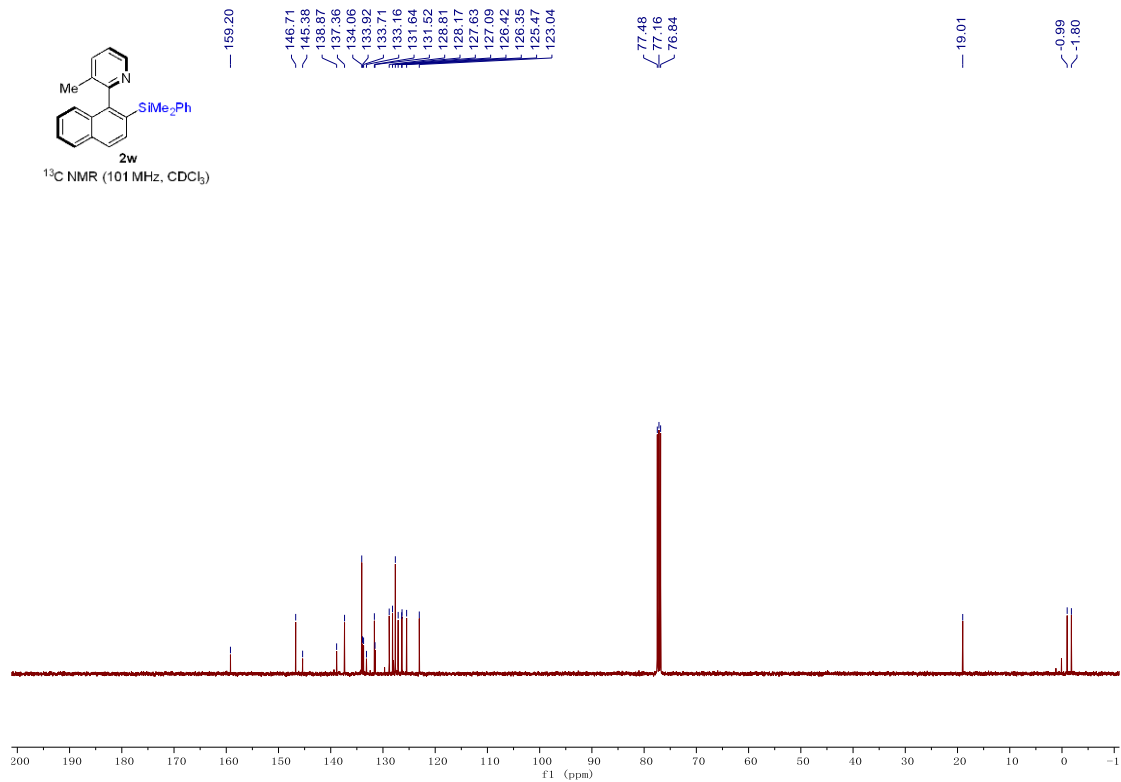

## HPLC Chromatograms

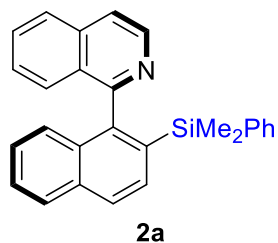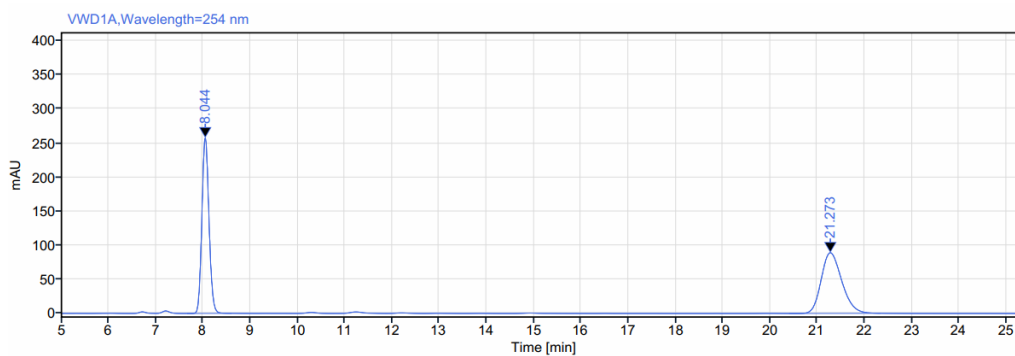

Signal: VWD1A, Wavelength=254 nm

| RT [min]   | Type | Width [min] | Area           | Height | Area% | Name |
|------------|------|-------------|----------------|--------|-------|------|
| 8.044      | MM m | 0.94        | 2684.39        | 257.83 | 49.92 |      |
| 21.273     | MM m | 1.93        | 2693.06        | 89.13  | 50.08 |      |
| <b>Sum</b> |      |             | <b>5377.45</b> |        |       |      |

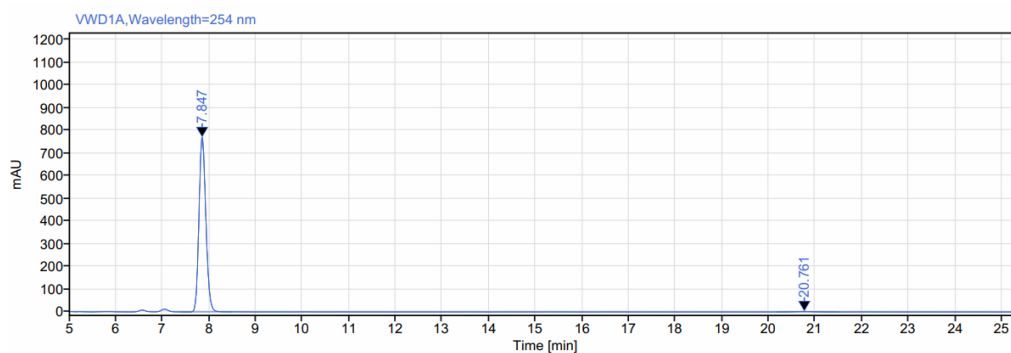

Signal: VWD1A, Wavelength=254 nm

| RT [min]   | Type | Width [min] | Area           | Height | Area% | Name |
|------------|------|-------------|----------------|--------|-------|------|
| 7.847      | MM m | 1.10        | 7915.26        | 769.16 | 99.26 |      |
| 20.761     | MM m | 1.34        | 58.72          | 2.01   | 0.74  |      |
| <b>Sum</b> |      |             | <b>7973.97</b> |        |       |      |

HPLC (Chiralpak IC-3):  $t_R = 7.85$  (major),  $20.76$  (minor)

Condition: 96:4, *n*-Hexane:*i*-PrOH, flow rate 1.0 mL/min, 25 °C, 254 nm.

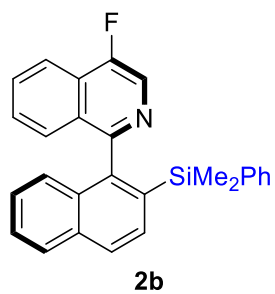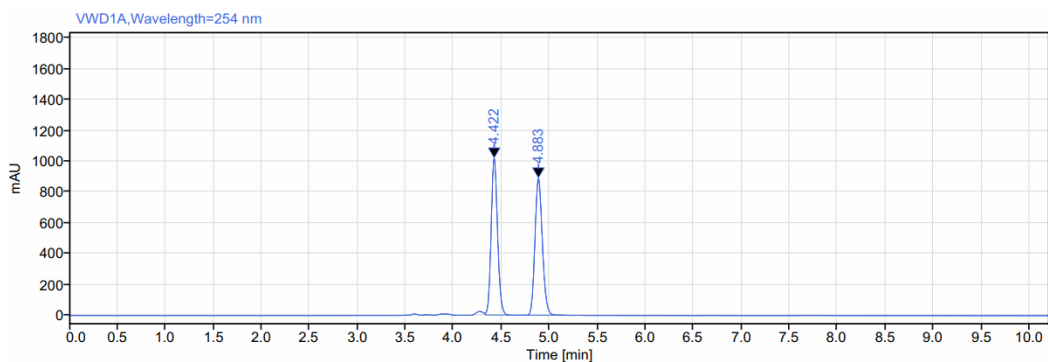

Signal: VWD1A,Wavelength=254 nm

| RT [min]   | Type | Width [min] | Area           | Height  | Area% | Name |
|------------|------|-------------|----------------|---------|-------|------|
| 4.422      | MM m | 0.35        | 4721.91        | 1017.57 | 49.84 |      |
| 4.883      | MM m | 0.49        | 4753.13        | 888.88  | 50.16 |      |
| <b>Sum</b> |      |             | <b>9475.03</b> |         |       |      |

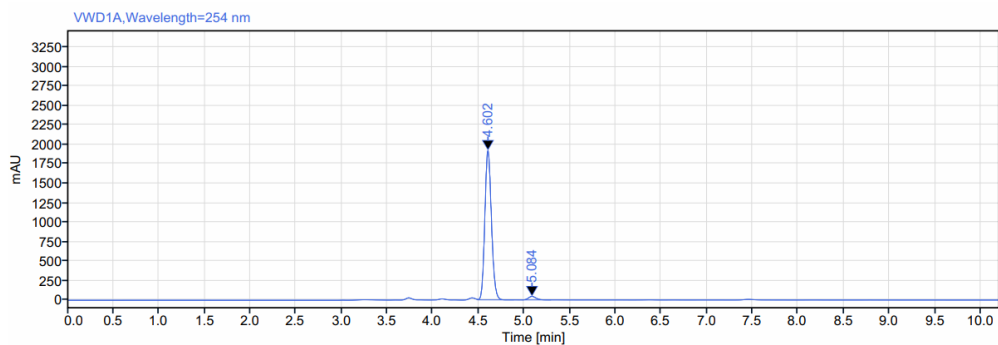

Signal: VWD1A,Wavelength=254 nm

| RT [min]   | Type | Width [min] | Area           | Height  | Area% | Name |
|------------|------|-------------|----------------|---------|-------|------|
| 4.602      | MM m | 0.40        | 9610.73        | 1922.95 | 97.36 |      |
| 5.084      | MM m | 0.32        | 260.53         | 45.20   | 2.64  |      |
| <b>Sum</b> |      |             | <b>9871.27</b> |         |       |      |

HPLC (Chiralpak IC-3):  $t_R = 4.60$  (major), 5.08 (minor)

Condition: 90:10, *n*-Hexane:*i*-PrOH, flow rate 1.0 mL/min, 25 °C, 254 nm.

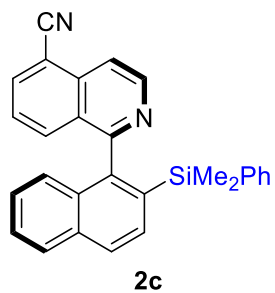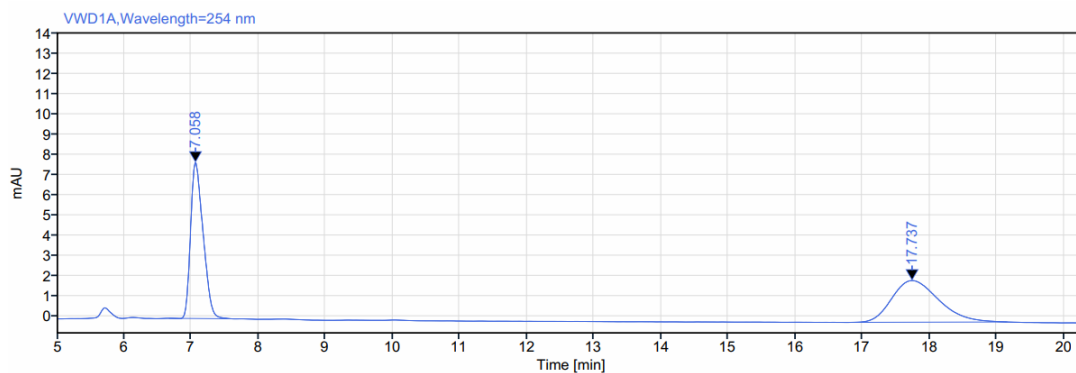

Signal: VWD1A, Wavelength=254 nm

| RT [min]   | Type | Width [min] | Area          | Height | Area% | Name |
|------------|------|-------------|---------------|--------|-------|------|
| 7.058      | MM m | 1.03        | 99.64         | 7.71   | 49.88 |      |
| 17.737     | MM m | 2.46        | 100.10        | 2.06   | 50.12 |      |
| <b>Sum</b> |      |             | <b>199.74</b> |        |       |      |

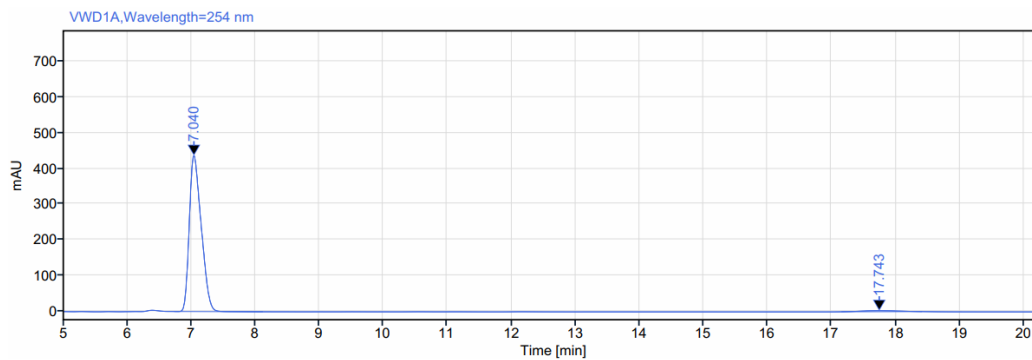

Signal: VWD1A, Wavelength=254 nm

| RT [min]   | Type | Width [min] | Area           | Height | Area% | Name |
|------------|------|-------------|----------------|--------|-------|------|
| 7.040      | MM m | 1.38        | 5626.87        | 435.42 | 97.98 |      |
| 17.743     | MM m | 1.26        | 116.04         | 2.85   | 2.02  |      |
| <b>Sum</b> |      |             | <b>5742.92</b> |        |       |      |

HPLC (Chiralpak OD-3):  $t_R = 7.04$  (major),  $17.74$  (minor)

Condition: 70:30, *n*-Hexane:*i*-PrOH, flow rate 0.7 mL/min, 25 °C, 254 nm.

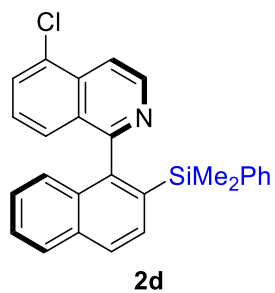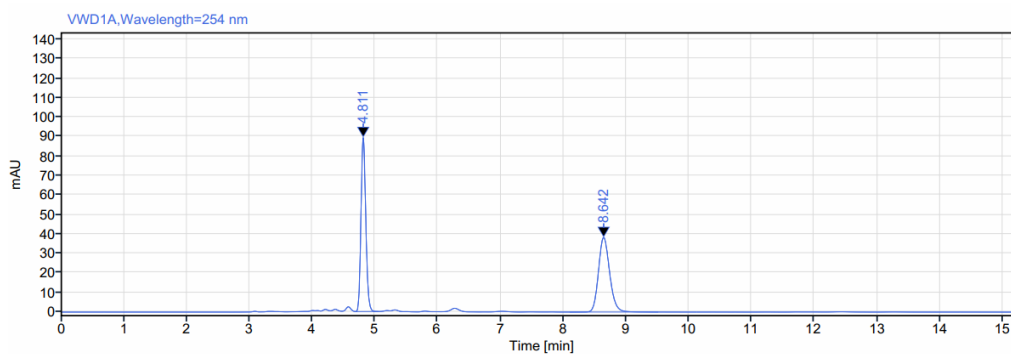

Signal: VWD1A,Wavelength=254 nm

| RT [min]   | Type | Width [min] | Area          | Height | Area% | Name |
|------------|------|-------------|---------------|--------|-------|------|
| 4.811      | MM m | 0.37        | 474.54        | 89.39  | 50.04 |      |
| 8.642      | MM m | 1.41        | 473.86        | 38.31  | 49.96 |      |
| <b>Sum</b> |      |             | <b>948.41</b> |        |       |      |

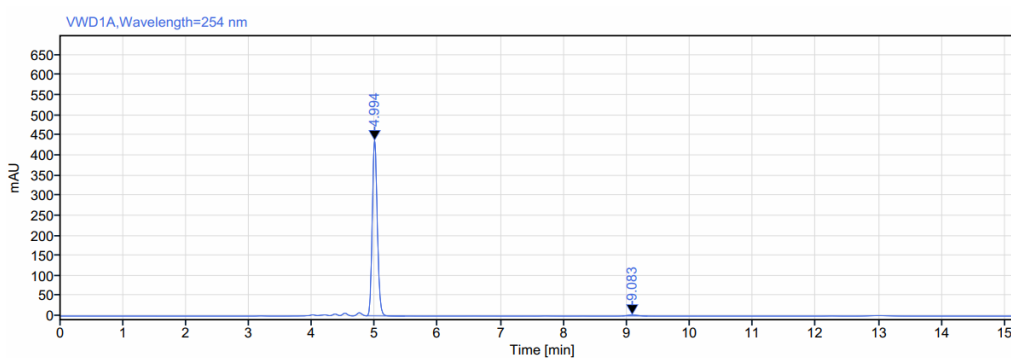

Signal: VWD1A,Wavelength=254 nm

| RT [min]   | Type | Width [min] | Area           | Height | Area% | Name |
|------------|------|-------------|----------------|--------|-------|------|
| 4.994      | MM m | 0.62        | 2442.96        | 436.18 | 98.90 |      |
| 9.083      | MM m | 0.40        | 27.24          | 2.38   | 1.10  |      |
| <b>Sum</b> |      |             | <b>2470.21</b> |        |       |      |

HPLC (Chiralpak IC-3):  $t_R = 4.99$  (major), 9.08 (minor)

Condition: 90:10, *n*-Hexane:*i*-PrOH, flow rate 1.0 mL/min, 25 °C, 254 nm.

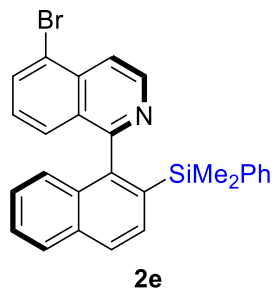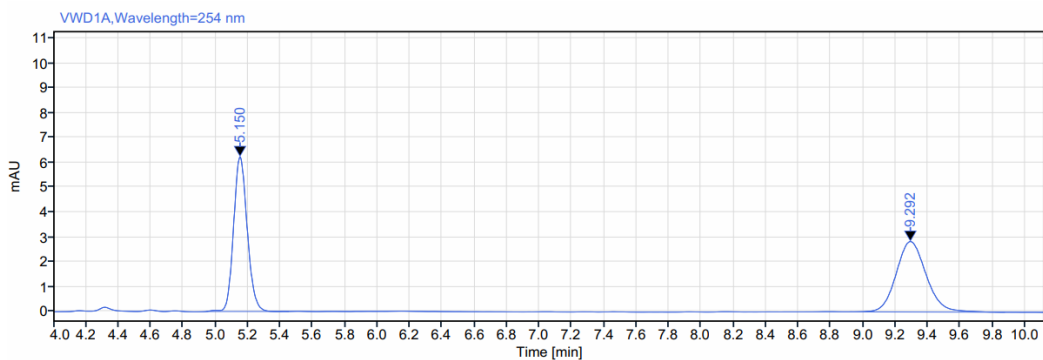

Signal: VWD1A,Wavelength=254 nm

| RT [min]   | Type | Width [min] | Area         | Height | Area% | Name |
|------------|------|-------------|--------------|--------|-------|------|
| 5.150      | MM m | 0.51        | 36.50        | 6.22   | 50.01 |      |
| 9.292      | MM m | 0.96        | 36.47        | 2.83   | 49.99 |      |
| <b>Sum</b> |      |             | <b>72.97</b> |        |       |      |

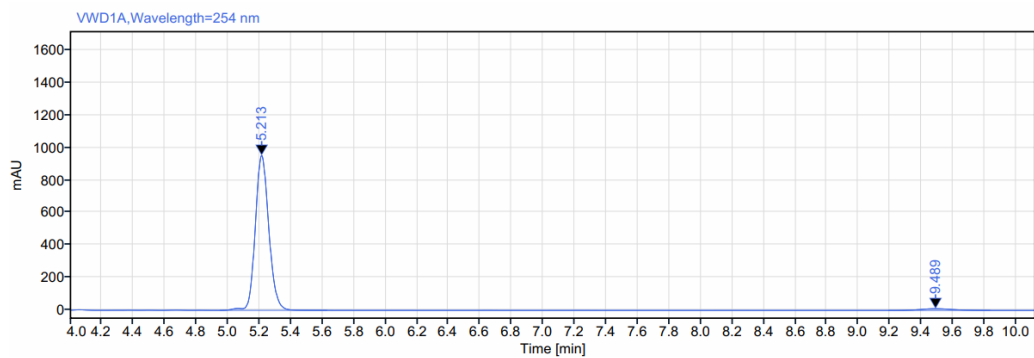

Signal: VWD1A,Wavelength=254 nm

| RT [min]   | Type | Width [min] | Area           | Height | Area% | Name |
|------------|------|-------------|----------------|--------|-------|------|
| 5.213      | MM m | 0.68        | 5689.62        | 951.95 | 97.58 |      |
| 9.489      | MM m | 0.65        | 140.92         | 10.39  | 2.42  |      |
| <b>Sum</b> |      |             | <b>5830.54</b> |        |       |      |

HPLC (Chiralpak IC-3):  $t_R = 5.21$  (major), 9.49 (minor)

Condition: 90:10, *n*-Hexane:*i*-PrOH, flow rate 1.0 mL/min, 25 °C, 254 nm.

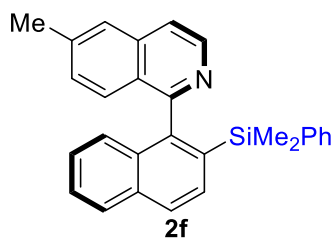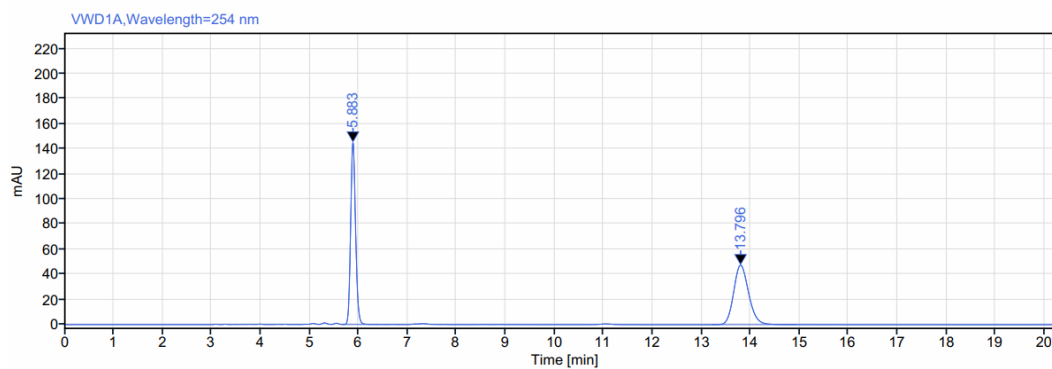

Signal: VWD1A,Wavelength=254 nm

| RT [min]   | Type | Width [min] | Area           | Height | Area% | Name |
|------------|------|-------------|----------------|--------|-------|------|
| 5.883      | MM m | 0.72        | 1011.14        | 145.23 | 50.16 |      |
| 13.796     | MM m | 1.74        | 1004.77        | 47.44  | 49.84 |      |
| <b>Sum</b> |      |             | <b>2015.91</b> |        |       |      |

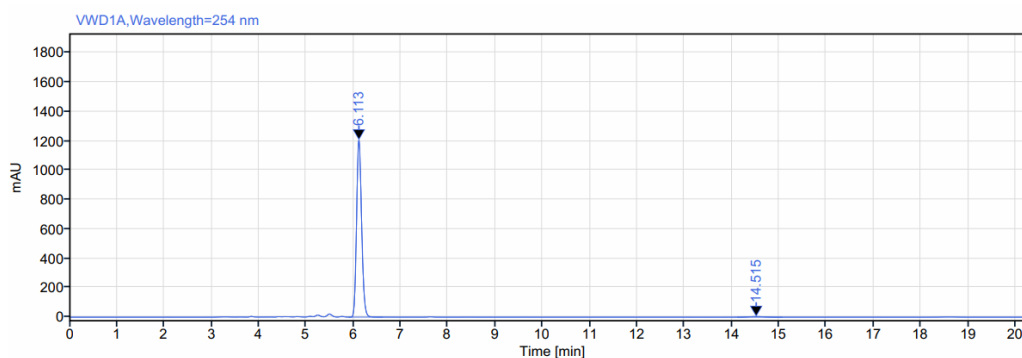

Signal: VWD1A,Wavelength=254 nm

| RT [min]   | Type | Width [min] | Area           | Height  | Area% | Name |
|------------|------|-------------|----------------|---------|-------|------|
| 6.113      | MM m | 0.72        | 8934.30        | 1207.05 | 99.00 |      |
| 14.515     | MM m | 0.96        | 90.22          | 3.96    | 1.00  |      |
| <b>Sum</b> |      |             | <b>9024.52</b> |         |       |      |

HPLC (Chiralpak IC-3):  $t_R = 6.11$  (major),  $14.52$  (minor)

Condition: 90:10, *n*-Hexane:*i*-PrOH, flow rate 1.0 mL/min, 25 °C, 254 nm.

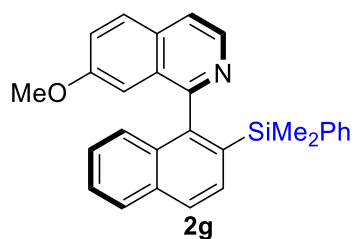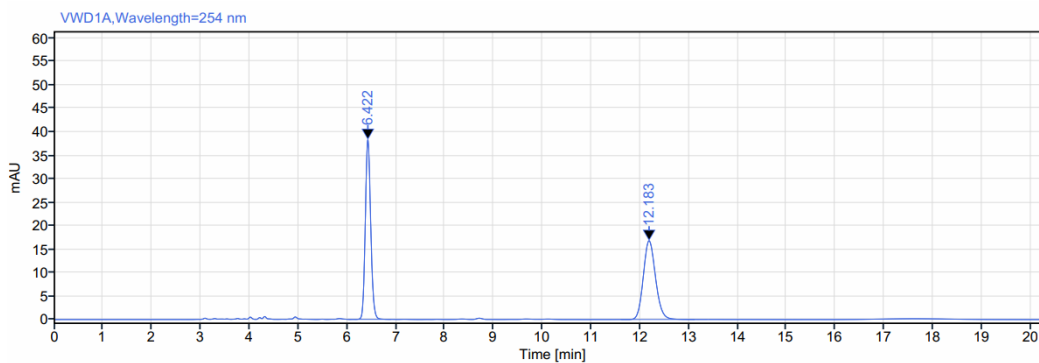

Signal: VWD1A, Wavelength=254 nm

| RT [min]   | Type | Width [min] | Area          | Height | Area% | Name |
|------------|------|-------------|---------------|--------|-------|------|
| 6.422      | MM m | 0.87        | 294.56        | 38.36  | 50.23 |      |
| 12.183     | MM m | 1.51        | 291.84        | 16.81  | 49.77 |      |
| <b>Sum</b> |      |             | <b>586.41</b> |        |       |      |

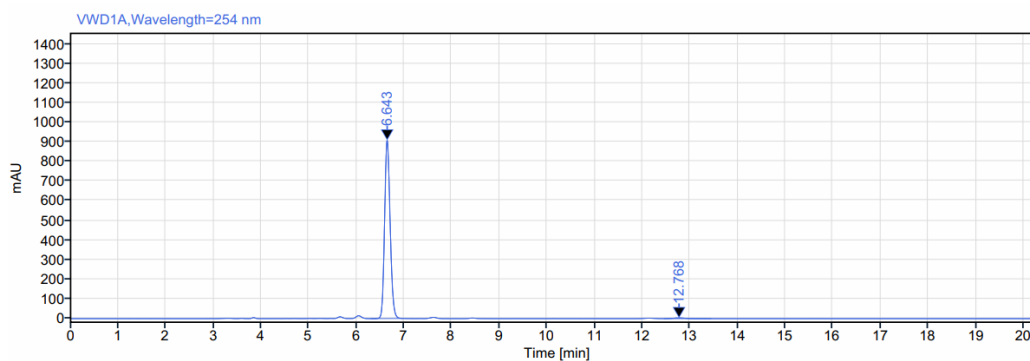

Signal: VWD1A, Wavelength=254 nm

| RT [min]   | Type | Width [min] | Area           | Height | Area% | Name |
|------------|------|-------------|----------------|--------|-------|------|
| 6.643      | MM m | 0.67        | 7335.00        | 907.96 | 99.09 |      |
| 12.768     | MM m | 0.99        | 67.07          | 3.67   | 0.91  |      |
| <b>Sum</b> |      |             | <b>7402.07</b> |        |       |      |

HPLC (Chiralpak IC-3):  $t_R = 6.64$  (major),  $12.77$  (minor)

Condition: 90:10, *n*-Hexane:*i*-PrOH, flow rate 1.0 mL/min, 25 °C, 254 nm.

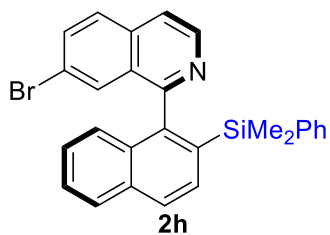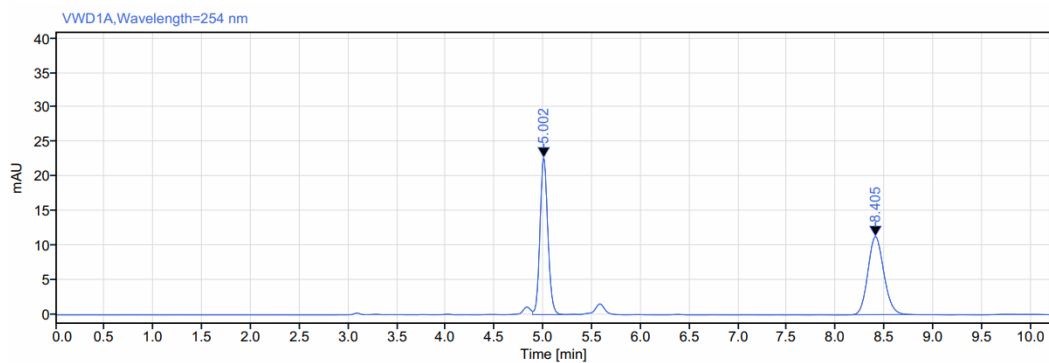

Signal: VWD1A,Wavelength=254 nm

| RT [min]   | Type | Width [min] | Area          | Height | Area% | Name |
|------------|------|-------------|---------------|--------|-------|------|
| 5.002      | MM m | 0.36        | 127.74        | 22.68  | 49.88 |      |
| 8.405      | MM m | 0.62        | 128.34        | 11.30  | 50.12 |      |
| <b>Sum</b> |      |             | <b>256.08</b> |        |       |      |

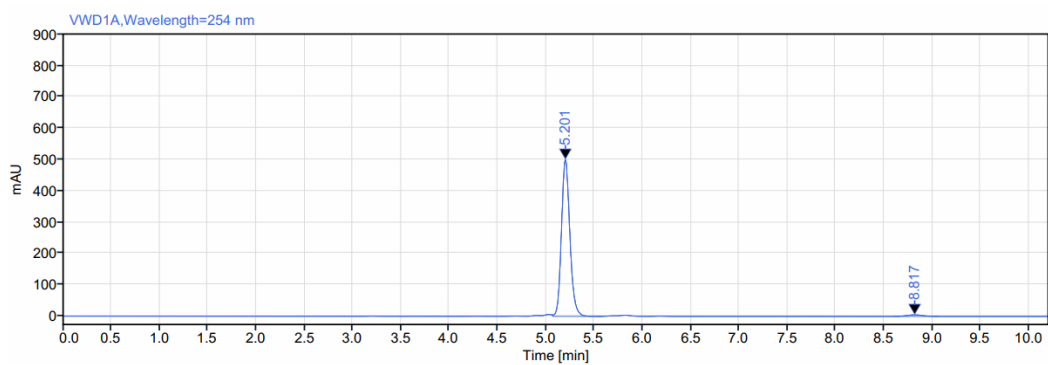

Signal: VWD1A,Wavelength=254 nm

| RT [min]   | Type | Width [min] | Area           | Height | Area% | Name |
|------------|------|-------------|----------------|--------|-------|------|
| 5.201      | MM m | 0.51        | 3050.86        | 501.11 | 98.09 |      |
| 8.817      | MM m | 0.46        | 59.32          | 5.12   | 1.91  |      |
| <b>Sum</b> |      |             | <b>3110.19</b> |        |       |      |

HPLC (Chiralpak IC-3):  $t_R = 5.20$  (major), 8.82 (minor)

Condition: 90:10, *n*-Hexane:*i*-PrOH, flow rate 1.0 mL/min, 25 °C, 254 nm.

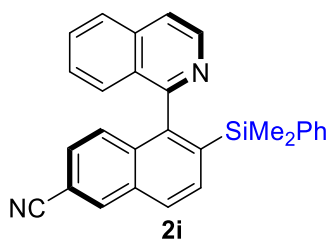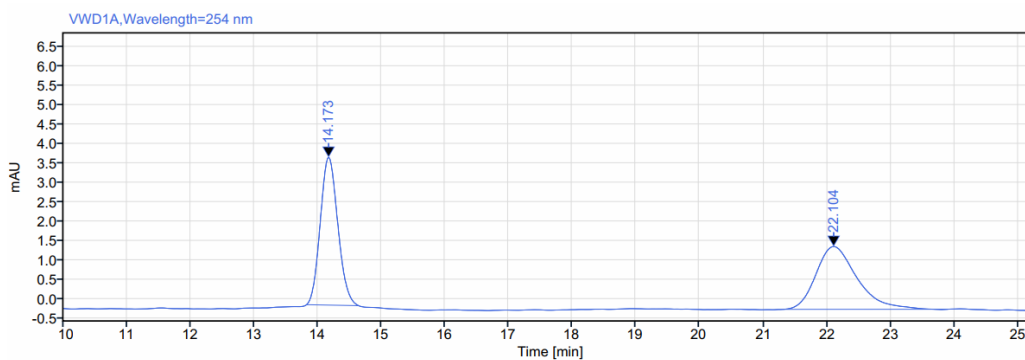

Signal: VWD1A,Wavelength=254 nm

| RT [min]   | Type | Width [min] | Area          | Height | Area% | Name |
|------------|------|-------------|---------------|--------|-------|------|
| 14.173     | MM m | 0.82        | 73.00         | 3.81   | 50.19 |      |
| 22.104     | MM m | 2.58        | 72.44         | 1.62   | 49.81 |      |
| <b>Sum</b> |      |             | <b>145.44</b> |        |       |      |

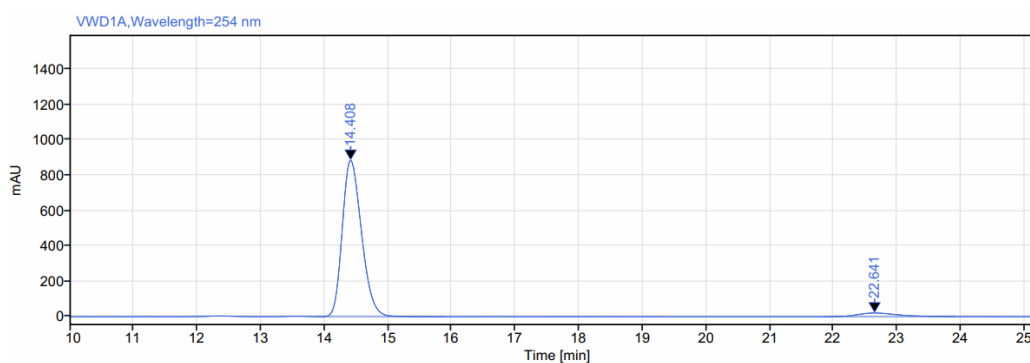

Signal: VWD1A,Wavelength=254 nm

| RT [min]   | Type | Width [min] | Area            | Height | Area% | Name |
|------------|------|-------------|-----------------|--------|-------|------|
| 14.408     | MM m | 2.04        | 18596.17        | 885.36 | 95.42 |      |
| 22.641     | MM m | 2.07        | 893.31          | 20.58  | 4.58  |      |
| <b>Sum</b> |      |             | <b>19489.48</b> |        |       |      |

HPLC (Chiralpak IC-3):  $t_R = 14.41$  (major),  $22.64$  (minor)

Condition: 80:20, *n*-Hexane:*i*-PrOH, flow rate 1.0 mL/min, 25 °C, 254 nm.

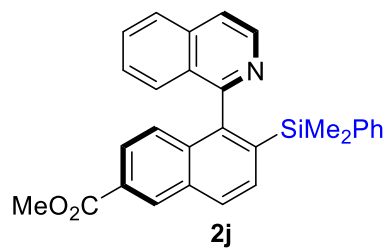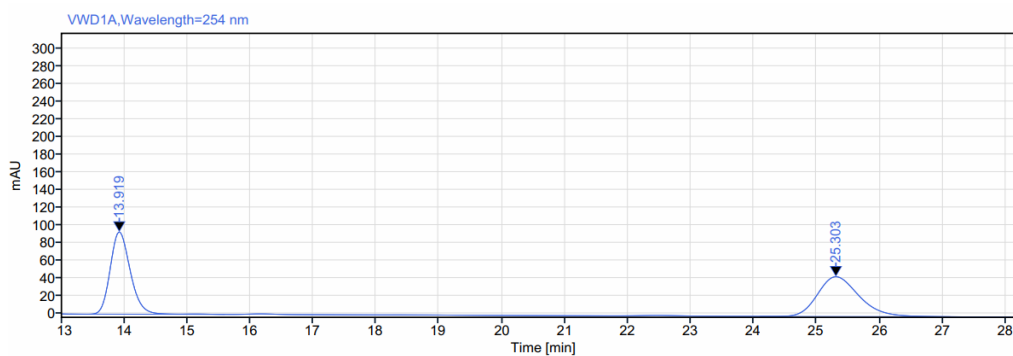

Signal: VWD1A,Wavelength=254 nm

| RT [min]   | Type | Width [min] | Area           | Height | Area% | Name |
|------------|------|-------------|----------------|--------|-------|------|
| 13.919     | MM m | 2.45        | 2060.51        | 92.94  | 50.05 |      |
| 25.303     | MM m | 3.02        | 2056.52        | 44.96  | 49.95 |      |
| <b>Sum</b> |      |             | <b>4117.03</b> |        |       |      |

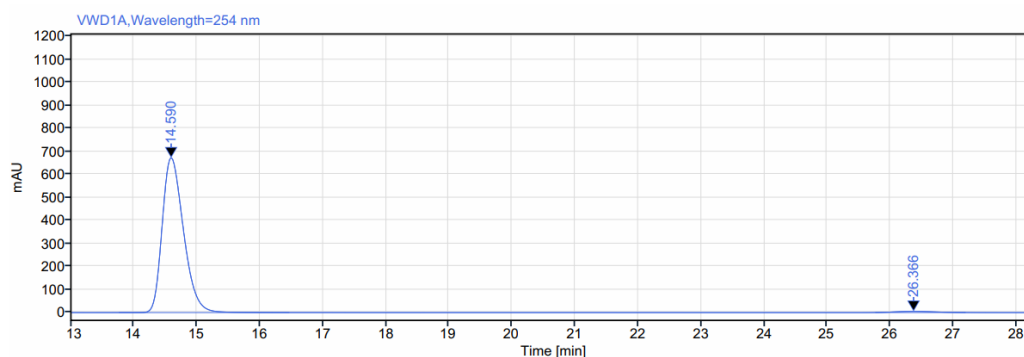

Signal: VWD1A,Wavelength=254 nm

| RT [min]   | Type | Width [min] | Area            | Height | Area% | Name |
|------------|------|-------------|-----------------|--------|-------|------|
| 14.590     | MM m | 2.70        | 15795.13        | 673.52 | 98.66 |      |
| 26.366     | MM m | 1.43        | 214.71          | 5.15   | 1.34  |      |
| <b>Sum</b> |      |             | <b>16009.84</b> |        |       |      |

HPLC (Chiralpak IC-3):  $t_R = 14.59$  (major),  $26.34$  (minor)

Condition: 90:10, *n*-Hexane:*i*-PrOH, flow rate 1.0 mL/min, 25 °C, 254 nm.

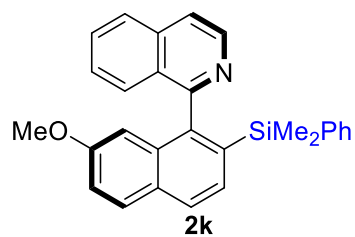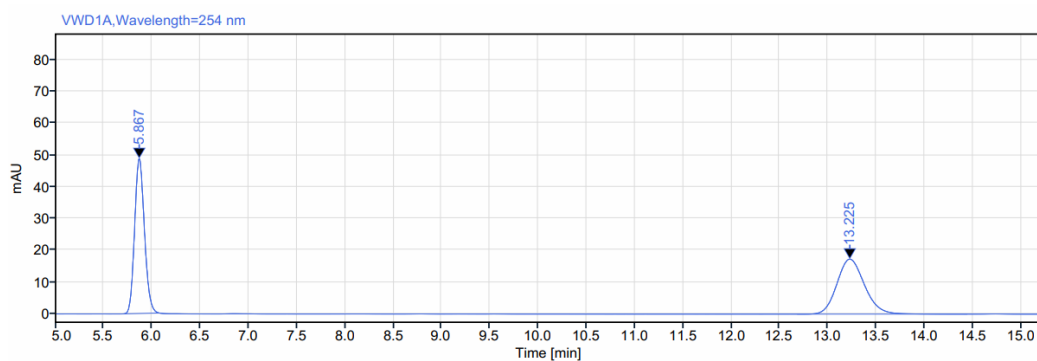

Signal: VWD1A,Wavelength=254 nm

| RT [min]   | Type | Width [min] | Area          | Height | Area% | Name |
|------------|------|-------------|---------------|--------|-------|------|
| 5.867      | MM m | 0.39        | 344.24        | 48.77  | 50.08 |      |
| 13.225     | MM m | 1.76        | 343.08        | 17.32  | 49.92 |      |
| <b>Sum</b> |      |             | <b>687.32</b> |        |       |      |

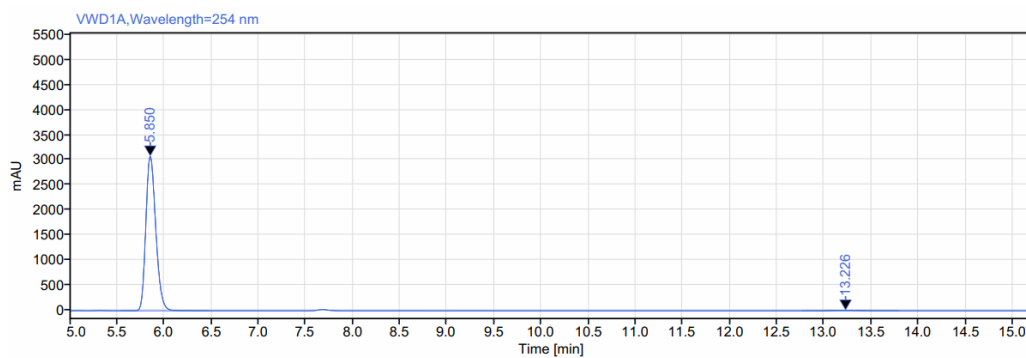

Signal: VWD1A,Wavelength=254 nm

| RT [min]   | Type | Width [min] | Area            | Height  | Area% | Name |
|------------|------|-------------|-----------------|---------|-------|------|
| 5.850      | MM m | 0.94        | 22485.31        | 3075.07 | 99.27 |      |
| 13.226     | MM m | 1.03        | 165.27          | 8.42    | 0.73  |      |
| <b>Sum</b> |      |             | <b>22650.58</b> |         |       |      |

HPLC (Chiralpak IC-3):  $t_R = 5.85$  (major), 13.23 (minor)

Condition: 90:10, *n*-Hexane:*i*-PrOH, flow rate 1.0 mL/min, 25 °C, 254 nm.

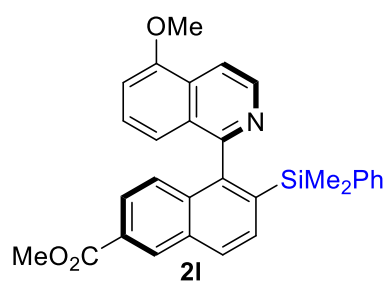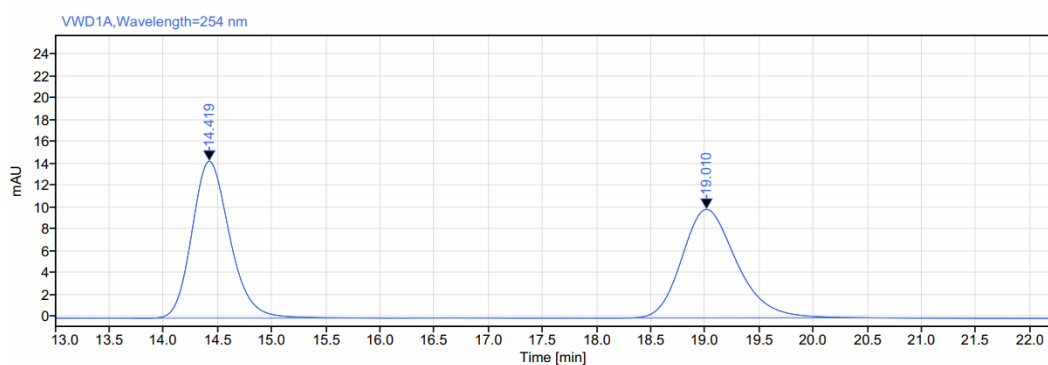

Signal: VWD1A,Wavelength=254 nm

| RT [min]   | Type | Width [min] | Area          | Height | Area% | Name |
|------------|------|-------------|---------------|--------|-------|------|
| 14.419     | MM m | 2.38        | 347.83        | 14.33  | 49.94 |      |
| 19.010     | MM m | 2.21        | 348.64        | 9.92   | 50.06 |      |
| <b>Sum</b> |      |             | <b>696.47</b> |        |       |      |

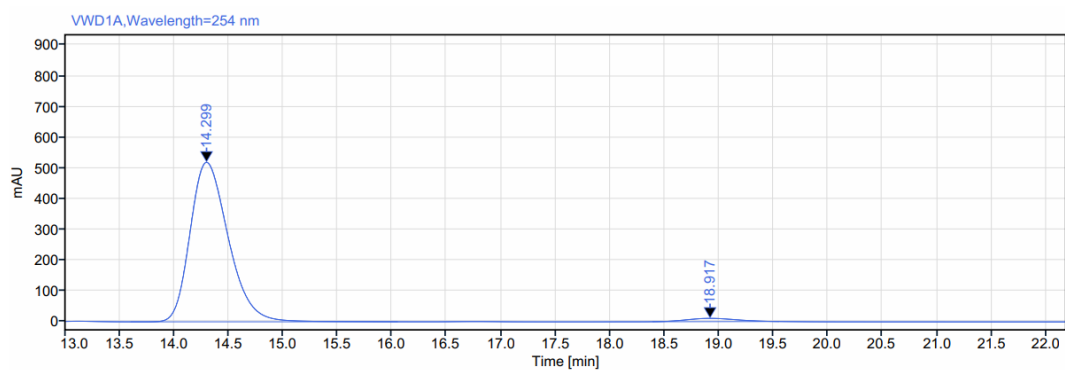

Signal: VWD1A,Wavelength=254 nm

| RT [min]   | Type | Width [min] | Area            | Height | Area% | Name |
|------------|------|-------------|-----------------|--------|-------|------|
| 14.299     | MM m | 2.45        | 12639.93        | 519.08 | 97.42 |      |
| 18.917     | MM m | 1.16        | 334.10          | 10.58  | 2.58  |      |
| <b>Sum</b> |      |             | <b>12974.03</b> |        |       |      |

HPLC (Chiralpak IC-3):  $t_R$  = 14.30 (major), 18.92 (minor)

Condition: 85:15, *n*-Hexane:*i*-PrOH, flow rate 1.0 mL/min, 25 °C, 254 nm.

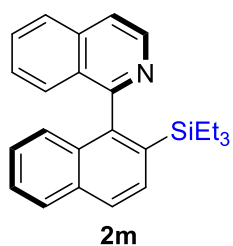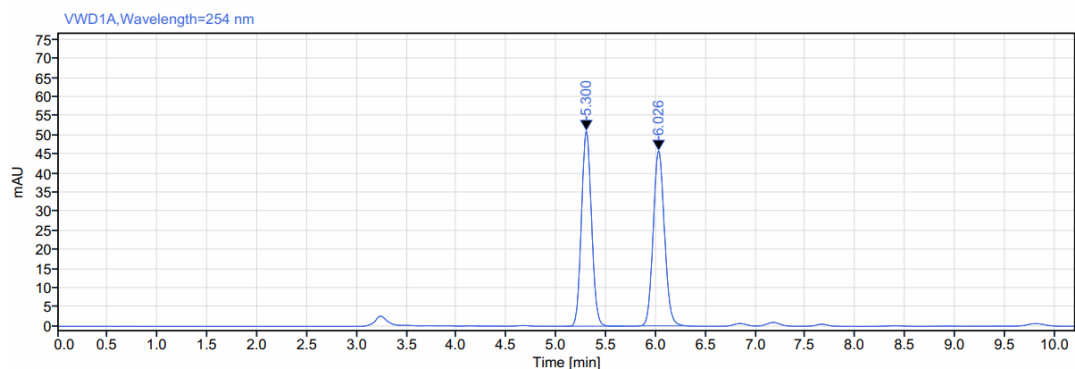

Signal: VWD1A,Wavelength=254 nm

| RT [min]   | Type | Width [min] | Area          | Height | Area% | Name |
|------------|------|-------------|---------------|--------|-------|------|
| 5.300      | MM m | 0.59        | 358.74        | 51.13  | 49.92 |      |
| 6.026      | MM m | 0.46        | 359.86        | 45.79  | 50.08 |      |
| <b>Sum</b> |      |             | <b>718.61</b> |        |       |      |

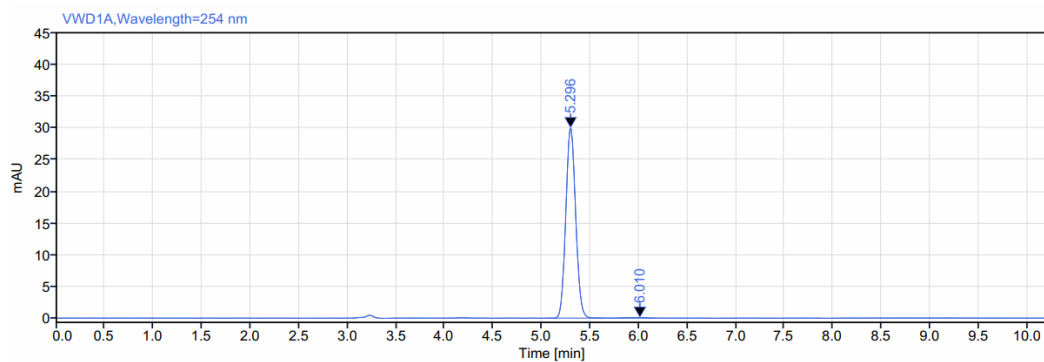

Signal: VWD1A,Wavelength=254 nm

| RT [min]   | Type | Width [min] | Area          | Height | Area% | Name |
|------------|------|-------------|---------------|--------|-------|------|
| 5.296      | MM m | 0.62        | 212.80        | 30.11  | 99.61 |      |
| 6.010      | MM m | 0.38        | 0.82          | 0.08   | 0.39  |      |
| <b>Sum</b> |      |             | <b>213.63</b> |        |       |      |

HPLC (Chiralpak IC-3):  $t_R = 5.30$  (major),  $6.01$  (minor)

Condition: 96:4, *n*-Hexane:*i*-PrOH, flow rate 1.0 mL/min, 25 °C, 254 nm.

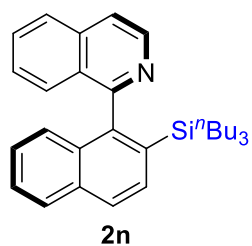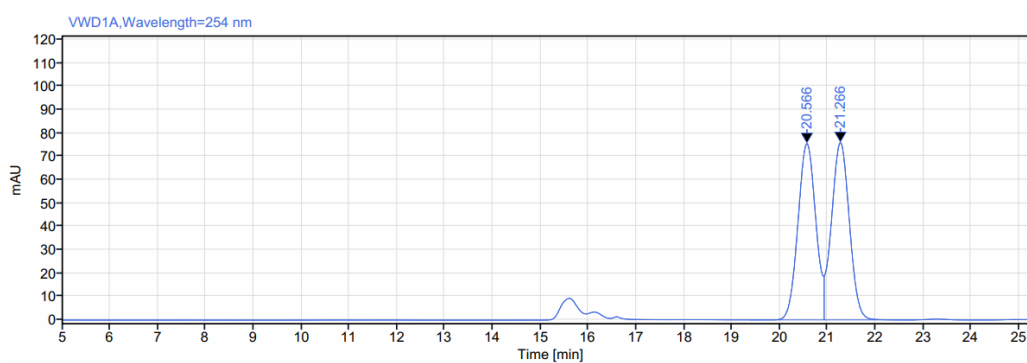

Signal: VWD1A,Wavelength=254 nm

| RT [min]   | Type | Width [min] | Area           | Height | Area% | Name |
|------------|------|-------------|----------------|--------|-------|------|
| 20.566     | MM m | 1.56        | 1956.71        | 75.50  | 49.81 |      |
| 21.266     | MM m | 1.91        | 1971.56        | 75.92  | 50.19 |      |
| <b>Sum</b> |      |             | <b>3928.27</b> |        |       |      |

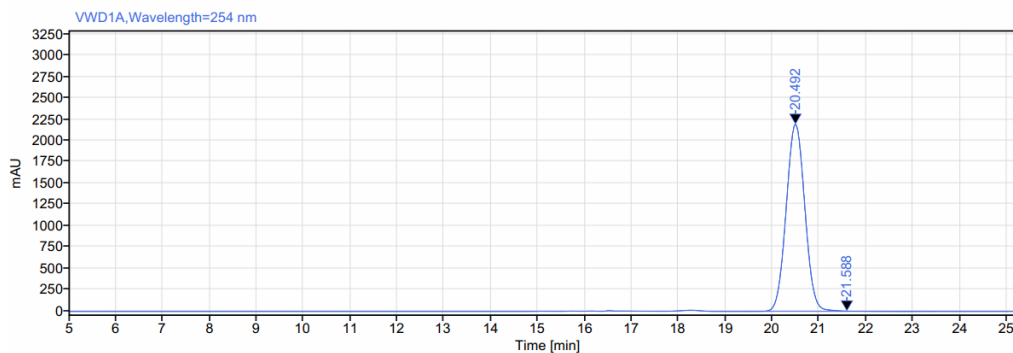

Signal: VWD1A,Wavelength=254 nm

| RT [min]   | Type | Width [min] | Area            | Height  | Area% | Name |
|------------|------|-------------|-----------------|---------|-------|------|
| 20.492     | MM m | 2.17        | 60586.26        | 2189.64 | 99.87 |      |
| 21.588     | MM m | 1.86        | 76.40           | 2.57    | 0.13  |      |
| <b>Sum</b> |      |             | <b>60662.65</b> |         |       |      |

HPLC (Chiralpak IC-3):  $t_R = 20.50$  (major),  $21.59$  (minor)

Condition: 99:1, *n*-Hexane:*i*-PrOH, flow rate 0.2 mL/min, 25 °C, 254 nm.

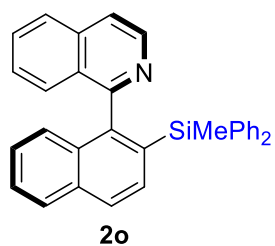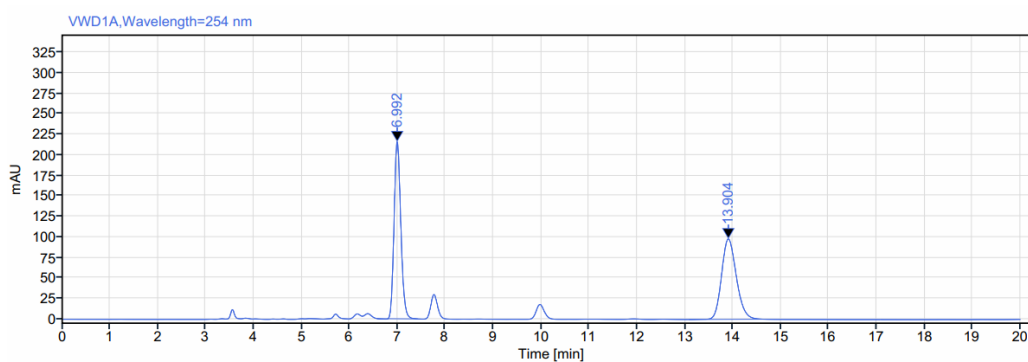

Signal: VWD1A,Wavelength=254 nm

| RT [min]   | Type | Width [min] | Area           | Height | Area% | Name |
|------------|------|-------------|----------------|--------|-------|------|
| 6.992      | MM m | 0.85        | 2103.51        | 215.53 | 50.12 |      |
| 13.904     | MM m | 1.58        | 2093.20        | 97.94  | 49.88 |      |
| <b>Sum</b> |      |             | <b>4196.71</b> |        |       |      |

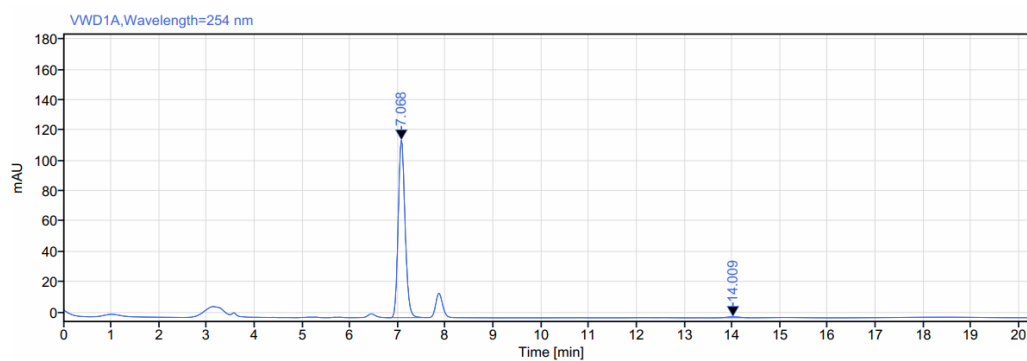

Signal: VWD1A,Wavelength=254 nm

| RT [min]   | Type | Width [min] | Area           | Height | Area% | Name |
|------------|------|-------------|----------------|--------|-------|------|
| 7.068      | MM m | 0.85        | 1170.49        | 116.81 | 99.07 |      |
| 14.009     | MM m | 0.61        | 11.00          | 0.59   | 0.93  |      |
| <b>Sum</b> |      |             | <b>1181.49</b> |        |       |      |

HPLC (Chiralpak IC-3):  $t_R = 7.07$  (major), 14.01 (minor)

Condition: 96:4, *n*-Hexane:*i*-PrOH, flow rate 1.0 mL/min, 25 °C, 254 nm.

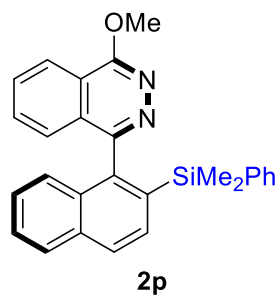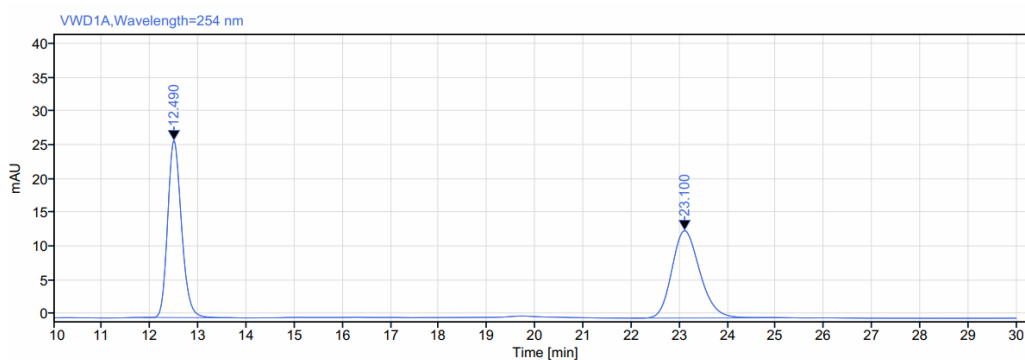

Signal: VWD1A,Wavelength=254 nm

| RT [min]   | Type | Width [min] | Area           | Height | Area% | Name |
|------------|------|-------------|----------------|--------|-------|------|
| 12.490     | MM m | 2.03        | 522.97         | 26.15  | 49.98 |      |
| 23.100     | MM m | 3.35        | 523.44         | 12.92  | 50.02 |      |
| <b>Sum</b> |      |             | <b>1046.40</b> |        |       |      |

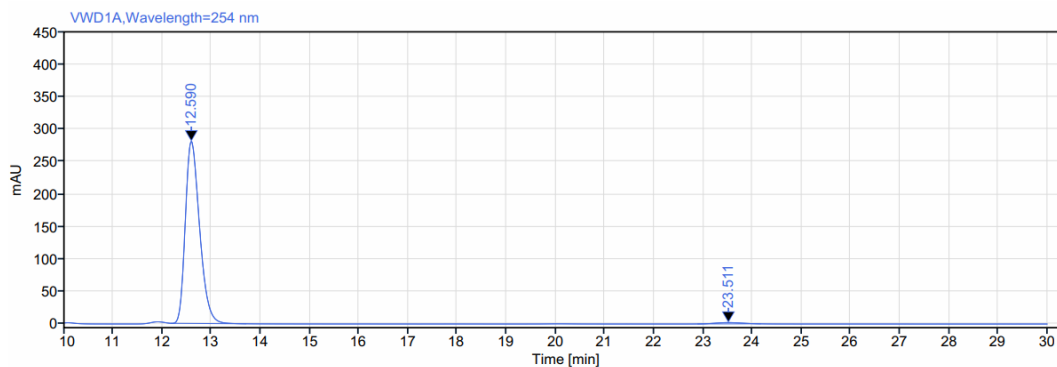

Signal: VWD1A,Wavelength=254 nm

| RT [min]   | Type | Width [min] | Area           | Height | Area% | Name |
|------------|------|-------------|----------------|--------|-------|------|
| 12.590     | MM m | 1.54        | 5673.94        | 281.12 | 98.67 |      |
| 23.511     | MM m | 1.29        | 76.51          | 2.05   | 1.33  |      |
| <b>Sum</b> |      |             | <b>5750.45</b> |        |       |      |

HPLC (Chiralpak IC-3):  $t_R = 12.59$  (major), 23.51 (minor)

Condition: 90:10, *n*-Hexane:*i*-PrOH, flow rate 1.0 mL/min, 25 °C, 254 nm.

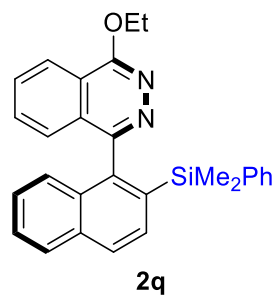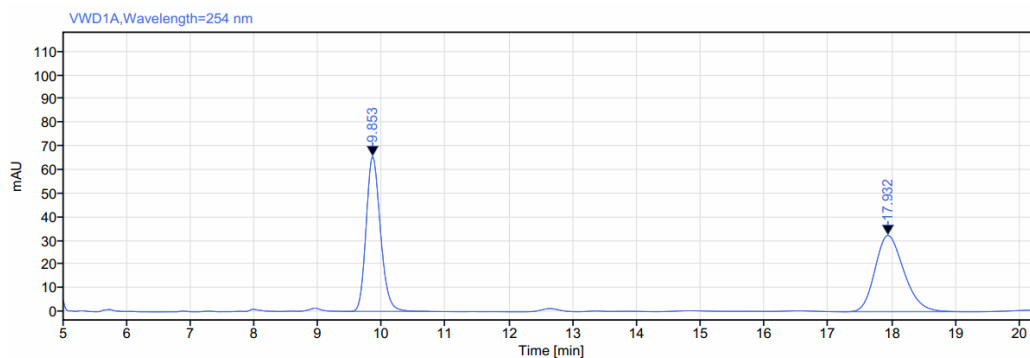

Signal: VWD1A,Wavelength=254 nm

| RT [min]   | Type | Width [min] | Area           | Height | Area% | Name |
|------------|------|-------------|----------------|--------|-------|------|
| 9.853      | MM m | 1.34        | 1020.49        | 65.46  | 50.10 |      |
| 17.932     | MM m | 1.91        | 1016.45        | 32.26  | 49.90 |      |
| <b>Sum</b> |      |             | <b>2036.94</b> |        |       |      |

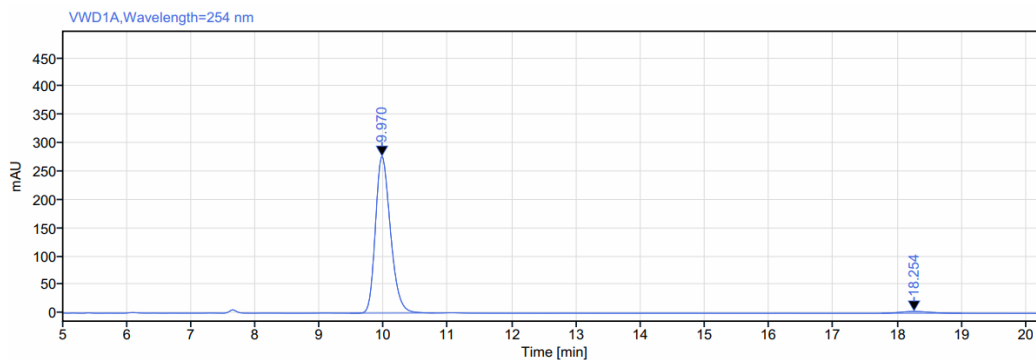

Signal: VWD1A,Wavelength=254 nm

| RT [min]   | Type | Width [min] | Area           | Height | Area% | Name |
|------------|------|-------------|----------------|--------|-------|------|
| 9.970      | MM m | 1.31        | 4494.18        | 276.57 | 97.85 |      |
| 18.254     | MM m | 1.25        | 98.62          | 3.14   | 2.15  |      |
| <b>Sum</b> |      |             | <b>4592.80</b> |        |       |      |

HPLC (Chiralpak IC-3):  $t_R = 9.97$  (major), 18.25 (minor)

Condition: 90:10, *n*-Hexane:*i*-PrOH, flow rate 1.0 mL/min, 25 °C, 254 nm.

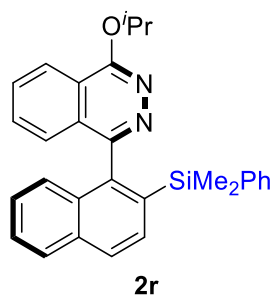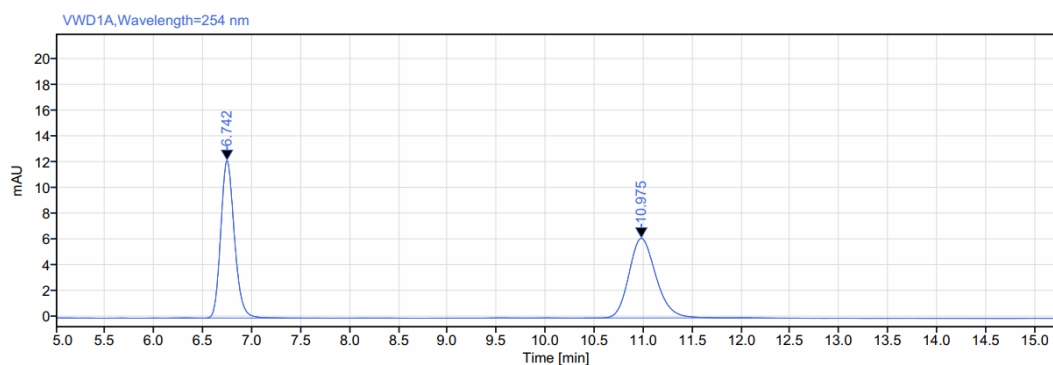

Signal: VWD1A,Wavelength=254 nm

| RT [min]   | Type | Width [min] | Area          | Height | Area% | Name |
|------------|------|-------------|---------------|--------|-------|------|
| 6.742      | MM m | 1.26        | 117.70        | 12.16  | 49.97 |      |
| 10.975     | MM m | 1.71        | 117.84        | 6.15   | 50.03 |      |
| <b>Sum</b> |      |             | <b>235.53</b> |        |       |      |

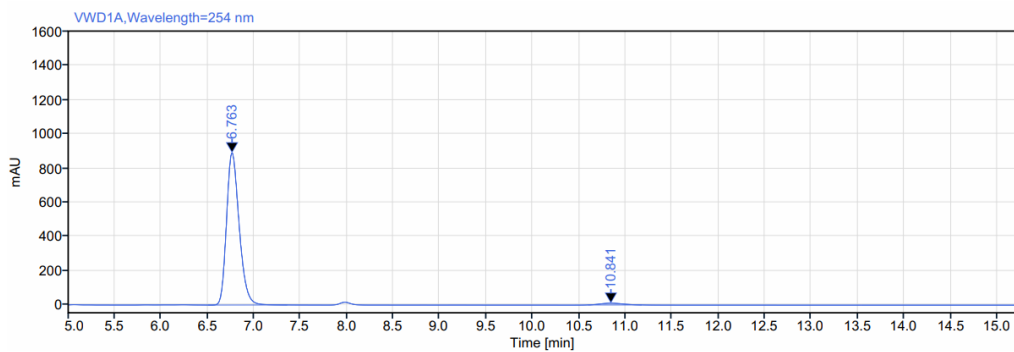

Signal: VWD1A,Wavelength=254 nm

| RT [min]   | Type | Width [min] | Area           | Height | Area% | Name |
|------------|------|-------------|----------------|--------|-------|------|
| 6.763      | MM m | 0.85        | 8424.83        | 891.48 | 98.01 |      |
| 10.841     | MM m | 0.58        | 171.20         | 10.31  | 1.99  |      |
| <b>Sum</b> |      |             | <b>8596.04</b> |        |       |      |

HPLC (Chiralpak IC-3):  $t_R = 6.76$  (major), 10.84 (minor)

Condition: 90:10, *n*-Hexane:*i*-PrOH, flow rate 1.0 mL/min, 25 °C, 254 nm.

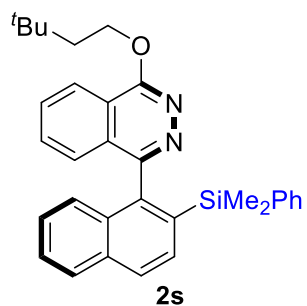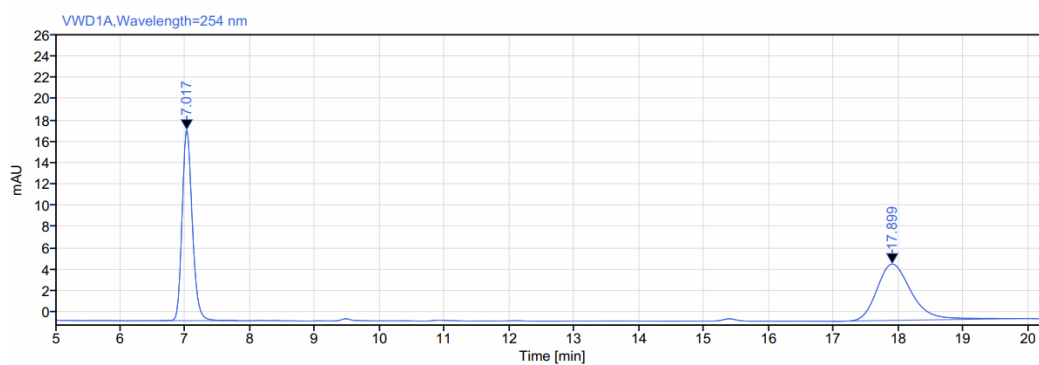

Signal: VWD1A,Wavelength=254 nm

| RT [min]   | Type | Width [min] | Area          | Height | Area% | Name |
|------------|------|-------------|---------------|--------|-------|------|
| 7.017      | MM m | 1.18        | 195.50        | 17.90  | 50.03 |      |
| 17.899     | MM m | 2.93        | 195.26        | 5.29   | 49.97 |      |
| <b>Sum</b> |      |             | <b>390.77</b> |        |       |      |

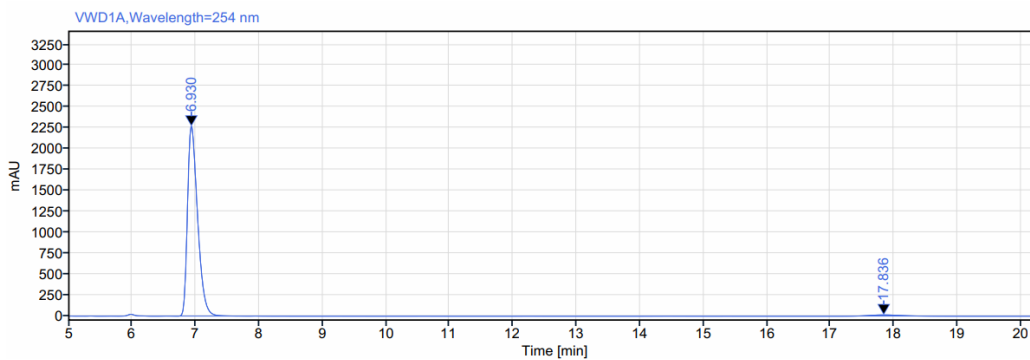

Signal: VWD1A,Wavelength=254 nm

| RT [min]   | Type | Width [min] | Area            | Height  | Area% | Name |
|------------|------|-------------|-----------------|---------|-------|------|
| 6.930      | MM m | 1.12        | 25097.46        | 2273.20 | 98.41 |      |
| 17.836     | MM m | 0.97        | 404.32          | 13.40   | 1.59  |      |
| <b>Sum</b> |      |             | <b>25501.78</b> |         |       |      |

HPLC (Chiralpak IC-3):  $t_R = 6.93$  (major),  $17.84$  (minor)

Condition: 90:10, *n*-Hexane:*i*-PrOH, flow rate 1.0 mL/min, 25 °C, 254 nm.

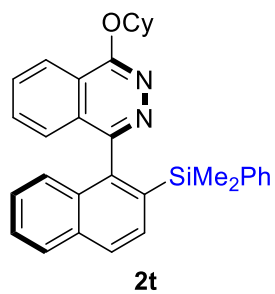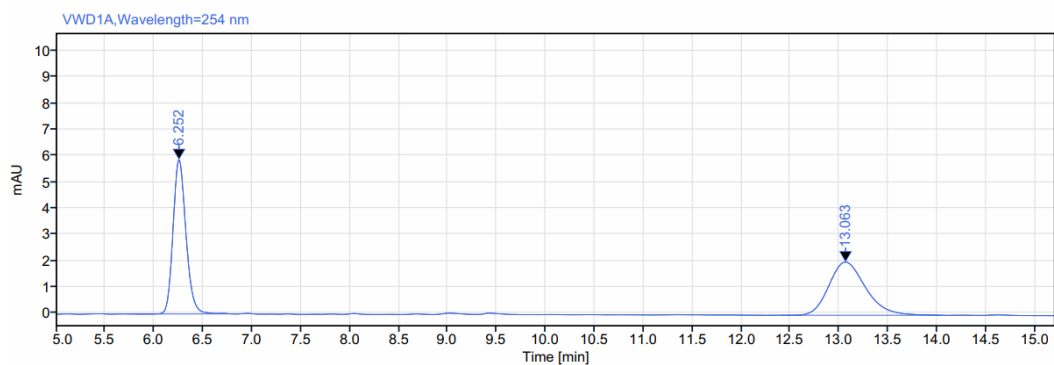

Signal: VWD1A,Wavelength=254 nm

| RT [min]   | Type | Width [min] | Area          | Height | Area% | Name |
|------------|------|-------------|---------------|--------|-------|------|
| 6.252      | MM m | 0.99        | 53.96         | 5.87   | 50.61 |      |
| 13.063     | MM m | 1.64        | 52.65         | 2.02   | 49.39 |      |
| <b>Sum</b> |      |             | <b>106.61</b> |        |       |      |

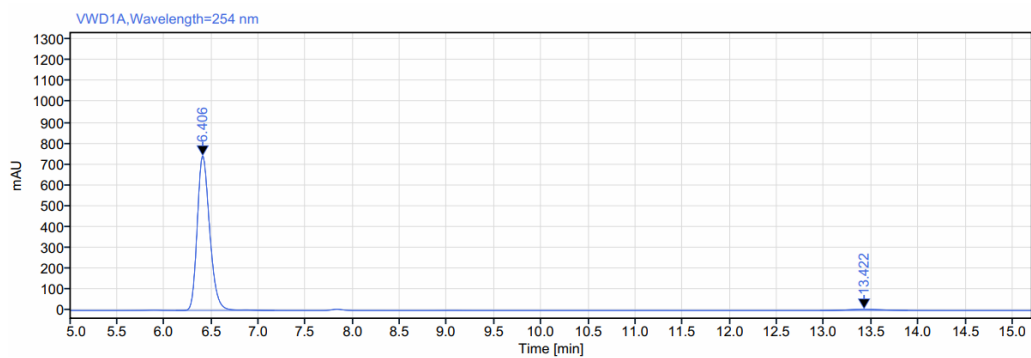

Signal: VWD1A,Wavelength=254 nm

| RT [min]   | Type | Width [min] | Area           | Height | Area% | Name |
|------------|------|-------------|----------------|--------|-------|------|
| 6.406      | MM m | 1.05        | 6813.21        | 740.72 | 98.07 |      |
| 13.422     | MM m | 0.93        | 134.05         | 5.57   | 1.93  |      |
| <b>Sum</b> |      |             | <b>6947.26</b> |        |       |      |

HPLC (Chiralpak IC-3):  $t_R = 6.41$  (major), 13.42 (minor)

Condition: 90:10, *n*-Hexane:*i*-PrOH, flow rate 1.0 mL/min, 25 °C, 254 nm.

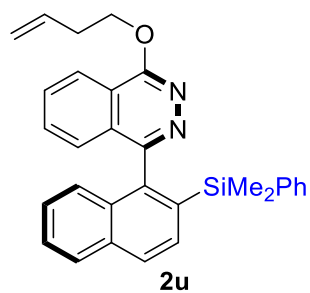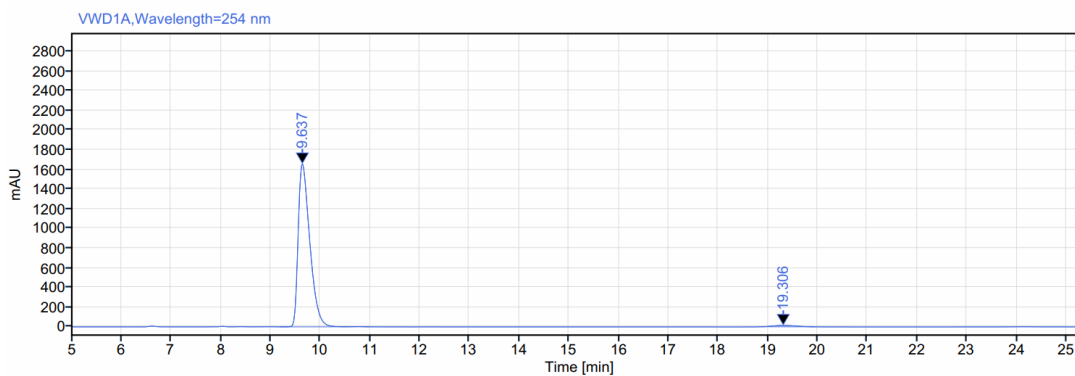

Signal: VWD1A,Wavelength=254 nm

| RT [min]   | Type | Width [min] | Area            | Height  | Area% | Name |
|------------|------|-------------|-----------------|---------|-------|------|
| 9.637      | VM m | 1.79        | 26897.34        | 1656.98 | 98.38 |      |
| 19.306     | MM m | 1.08        | 442.97          | 13.86   | 1.62  |      |
| <b>Sum</b> |      |             | <b>27340.32</b> |         |       |      |

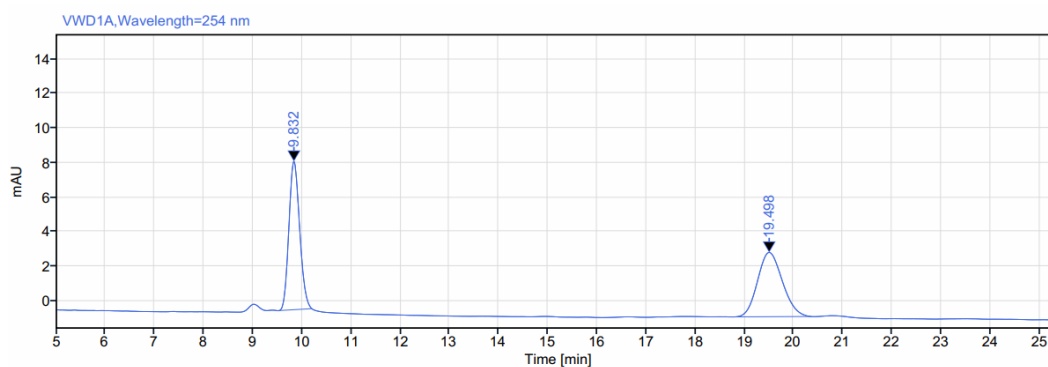

Signal: VWD1A,Wavelength=254 nm

| RT [min]   | Type | Width [min] | Area          | Height | Area% | Name |
|------------|------|-------------|---------------|--------|-------|------|
| 9.832      | MM m | 0.71        | 129.98        | 8.56   | 49.96 |      |
| 19.498     | MM m | 1.61        | 130.19        | 3.71   | 50.04 |      |
| <b>Sum</b> |      |             | <b>260.17</b> |        |       |      |

HPLC (Chiralpak IC-3):  $t_R = 9.83$  (major), 19.50 (minor)

Condition: 90:10, *n*-Hexane:*i*-PrOH, flow rate 1.0 mL/min, 25 °C, 254 nm.

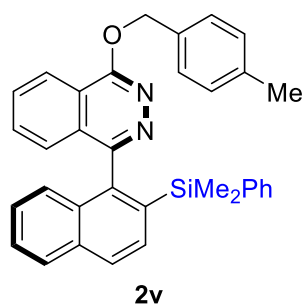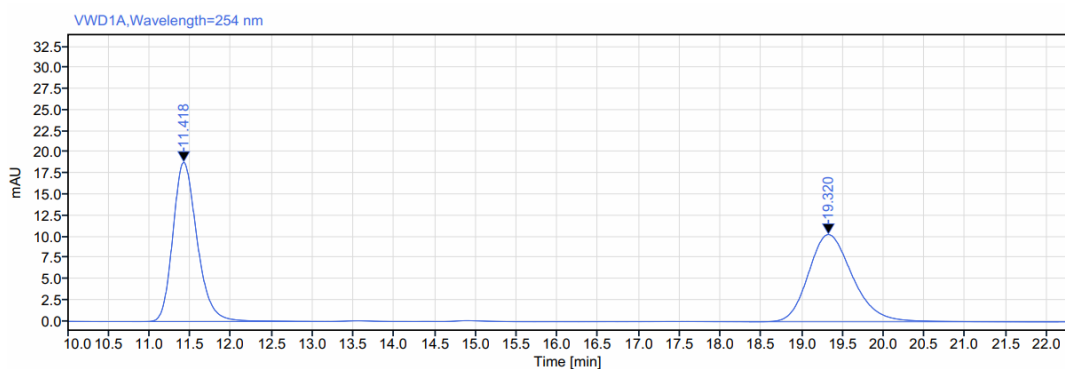

Signal: VWD1A,Wavelength=254 nm

| RT [min]   | Type | Width [min] | Area          | Height | Area% | Name |
|------------|------|-------------|---------------|--------|-------|------|
| 11.418     | MM m | 2.18        | 389.61        | 18.85  | 50.08 |      |
| 19.320     | MM m | 3.79        | 388.42        | 10.33  | 49.92 |      |
| <b>Sum</b> |      |             | <b>778.03</b> |        |       |      |

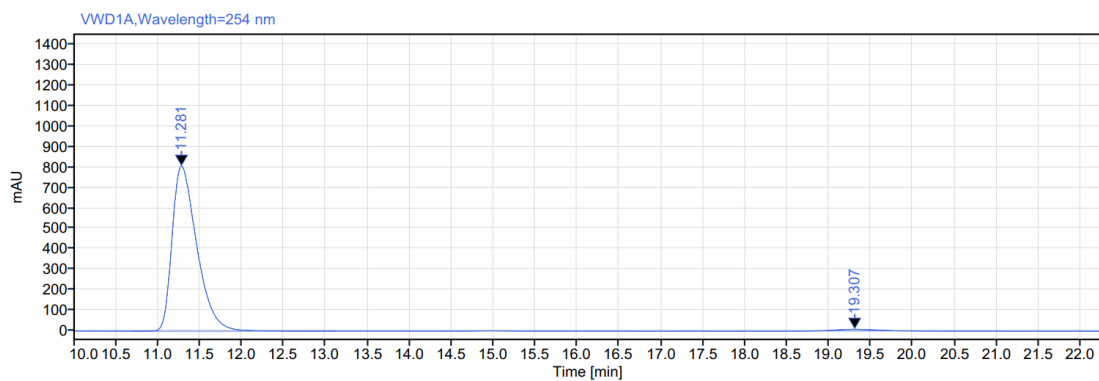

Signal: VWD1A,Wavelength=254 nm

| RT [min]   | Type | Width [min] | Area            | Height | Area% | Name |
|------------|------|-------------|-----------------|--------|-------|------|
| 11.281     | MM m | 2.43        | 16482.03        | 804.92 | 98.39 |      |
| 19.307     | MM m | 1.04        | 269.12          | 8.44   | 1.61  |      |
| <b>Sum</b> |      |             | <b>16751.15</b> |        |       |      |

HPLC (Chiralpak IC-3):  $t_R = 11.28$  (major),  $19.30$  (minor)

Condition: 90:10, *n*-Hexane:*i*-PrOH, flow rate 1.0 mL/min, 25 °C, 254 nm.

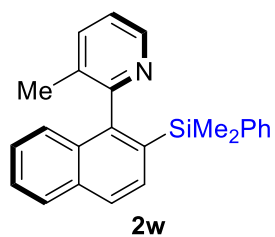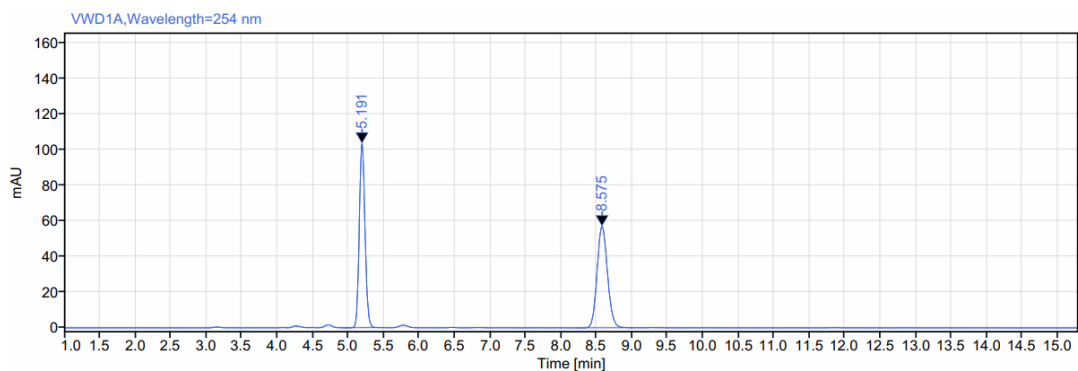

Signal: VWD1A,Wavelength=254 nm

| RT [min]   | Type | Width [min] | Area           | Height | Area% | Name |
|------------|------|-------------|----------------|--------|-------|------|
| 5.191      | MM m | 0.52        | 581.65         | 103.74 | 49.95 |      |
| 8.575      | MM m | 0.79        | 582.85         | 57.12  | 50.05 |      |
| <b>Sum</b> |      |             | <b>1164.49</b> |        |       |      |

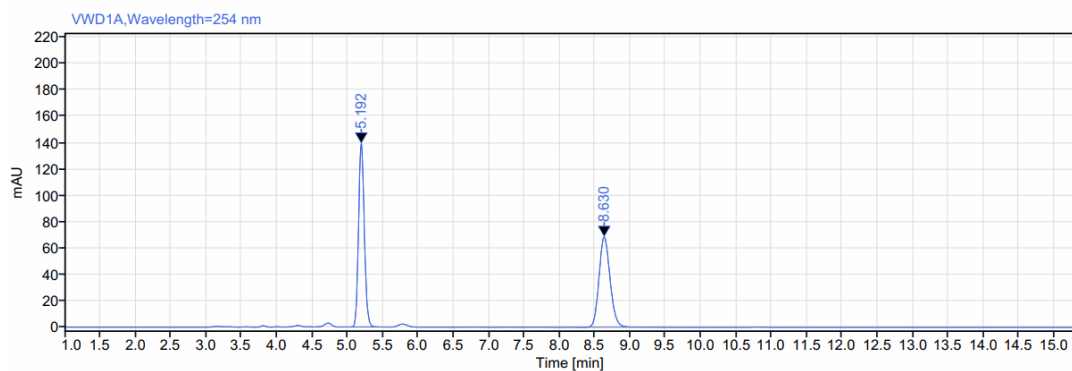

Signal: VWD1A,Wavelength=254 nm

| RT [min]   | Type | Width [min] | Area           | Height | Area% | Name |
|------------|------|-------------|----------------|--------|-------|------|
| 5.192      | MM m | 0.50        | 790.66         | 139.33 | 51.54 |      |
| 8.630      | MM m | 0.87        | 743.51         | 68.54  | 48.46 |      |
| <b>Sum</b> |      |             | <b>1534.16</b> |        |       |      |

HPLC (Chiralpak IC-3):  $t_R = 5.19$  (major),  $8.63$  (minor)

Condition: 90:10, *n*-Hexane:*i*-PrOH, flow rate 1.0 mL/min, 25 °C, 254 nm.
